# Supplementary material for: Base-free regio- and stereoselective photochemical synthesis of enol ethers from 1,3-dicarbonyl compounds
Source: Royal Society of Chemistry journal article supplement (doi:10.1039/d3cc03317a), 2023-01-01

## Electronic Supporting Information

### **Base-free regio- and stereoselective photochemical synthesis of enol ethers from 1,3-dicarbonyl compounds**

Keyong Zhu<sup>a</sup>, Wen-Jing Yu<sup>b</sup>, Xinlong Zhou<sup>a</sup>, Chaogui Xu<sup>a</sup>, Guanzhen Zhao<sup>a</sup>, Yun Chai<sup>a\*</sup>, Shi-Jun Li<sup>b\*</sup>, Yuanqing Xu<sup>a</sup>,  
and Pan Li<sup>a\*</sup>

<sup>a</sup>College of Chemistry and Molecular Sciences, Henan University, Kaifeng, 475004, P. R. China

<sup>b</sup>College of Chemistry, Institute of Green Catalysis, Zhengzhou University, Zhengzhou, 450001, P. R. China

Email: chaiyun@henu.edu.cn

Email: lishijunzong@zzu.edu.cn

Email: panli@henu.edu.cn

#### **Table of Contents**

|                                                                                                                                                                                                                                                                                  |            |
|----------------------------------------------------------------------------------------------------------------------------------------------------------------------------------------------------------------------------------------------------------------------------------|------------|
| General Information.....                                                                                                                                                                                                                                                         | ESI2       |
| The Reaction Equipment and Light Source.....                                                                                                                                                                                                                                     | ESI2       |
| Confirm the Structure of <b>3aa</b> , <b>3aa'</b> , or <b>3aa''</b> .....                                                                                                                                                                                                        | ESI3       |
| Gram Scale Experiment.....                                                                                                                                                                                                                                                       | ESI3       |
| Control Experiments.....                                                                                                                                                                                                                                                         | ESI4       |
| Radical Trapping Experiments.....                                                                                                                                                                                                                                                | ESI4-ESI5  |
| Computational Details.....                                                                                                                                                                                                                                                       | ESI5-ESI19 |
| Typical Experimental Procedure A and Data of the Enol Ethers.....                                                                                                                                                                                                                | SI19-SI27  |
| Typical Experimental Procedure B and Data of the Enol Ethers.....                                                                                                                                                                                                                | SI27-SI34  |
| Typical Experimental Procedure C and Data of the Enol Ethers.....                                                                                                                                                                                                                | SI35-SI36  |
| Copies of <sup>1</sup> H and <sup>13</sup> C{ <sup>1</sup> H} NMR Spectra of All the Products, NOESY Spectra of Products <b>3aa</b> ,<br><b>3ba</b> , <b>3ca</b> , <b>3ea</b> , <b>3fa</b> , <b>3ga</b> , <b>3ha</b> , <b>3ia</b> , <b>3ja</b> , <b>3ka</b> and <b>3ab</b> ..... | SI37-SI84  |

### General Information:

All reagents purchased from commercial sources were used as received. The silica gel for column chromatography was supplied as 300–400 meshes. The  $^1\text{H}$  and  $^{13}\text{C}$  NMR spectra were recorded on a Bruker AVANCE III spectrometer and are referenced to the residual solvent signals (7.26 ppm for  $^1\text{H}$  and 77.0 ppm for  $^{13}\text{C}$  in  $\text{CDCl}_3$ ; 2.50 ppm for  $^1\text{H}$  and 39.5 ppm for  $^{13}\text{C}$  in  $d_6$ -DMSO, 3.31 ppm for  $^1\text{H}$  and 49.0 ppm for  $^{13}\text{C}$  in  $\text{CD}_3\text{OD}$ ). The HRMS spectra were recorded on a Bruker MicroTOF Q II spectrometer.

### The Reaction Equipment and Light Source

We use RLH-18 8-position photo reaction system, which manufactured by Beijing Rogertech Co.ltd base in Beijing PRC. This Photo reactor we used have equipped 8 blue light 10W LED. This blue light 10 WLED's energy peak wavelength is 455 nm, peak width at half-height is 25 nm, irradiance@10 W is  $172 \text{ mW/cm}^2$ . Irradiation vessel is borosilicate glass test tube, LED irradiate through a high-reflection channel to the test tube, path length is 2 cm. No filter between LED and test tube. We conducted the photoreaction in room temperature (about  $20^\circ\text{C}$ – $30^\circ\text{C}$ ). In summer, we controlled the temperature of the reaction mixture to keep in about  $25^\circ\text{C}$  using low-temperature cycle.

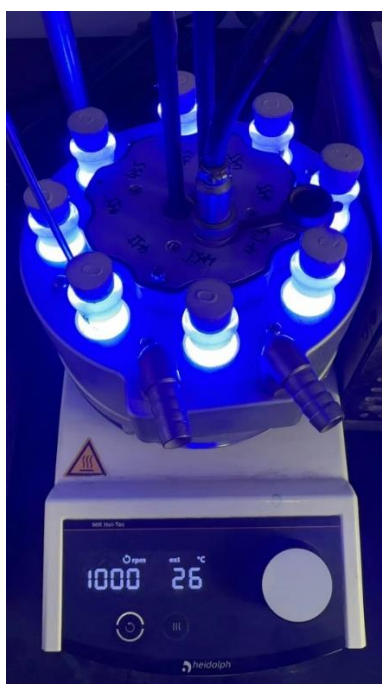

**Figure S1.** The Reaction Equipment and Light Source ( $\lambda_{\text{max}} = 455 \text{ nm}$ ,  $\Delta\lambda = 25 \text{ nm}$ )

### Confirm the Structure of 3aa, 3aa', or 3aa''

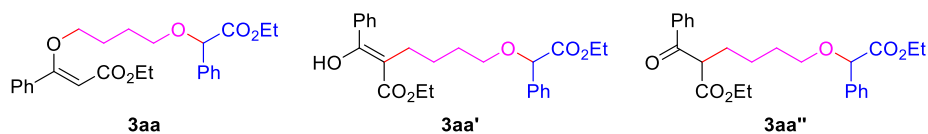

There are two single peaks (5.52 ppm, 4.84 ppm) in the <sup>1</sup>H NMR, and the maximum chemical shift of carbon is less than 171 ppm. Because **3aa''** only includes one single peak in the <sup>1</sup>H NMR and carbonyl group in the <sup>13</sup>C NMR should be more than 190 ppm, **3aa''** should be excluded. In general, OH group chemical shift of **3aa'** should be more than 10 ppm owing to intramolecular hydrogen bond of 1,3-dicarbonyl compound. Additionally, HSQC Spectra (Figure S2) indicated that the two single peaks of hydrogen linked to carbon atoms. Therefore, **3aa'** should be excluded. Based on the above analysis, the structure should be **3aa**.

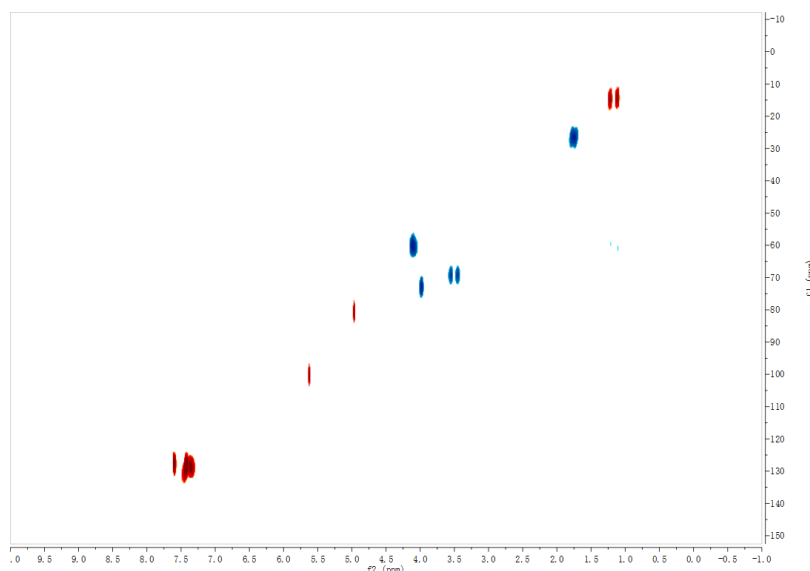

Figure S2. HSQC Spectra

### Gram Scale Experiment

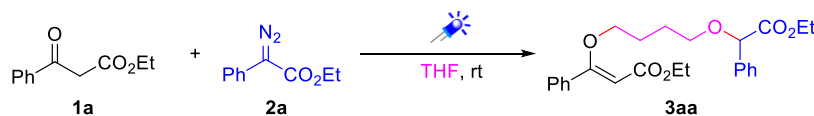

To a 100 mL Schlenk flask was added ethyl 3-oxo-3-phenylpropanoate **1a** (5 mmol, 960 mg) and THF (50 mL), followed by ethyl 2-diazo-2-phenylacetate **2a** (7.5 mmol, 1.4 g). Then Schlenk tube was tightly screw capped. The mixture was stirred under the blue LEDs for 18 h. The solvents were evaporated in vacuo, and the residue was purified by flash column chromatography, eluting with petroleum ether and ethyl acetate (10:1) to afford the desired product **3aa** (1.49 g, 70% yield).

## Control Experiments

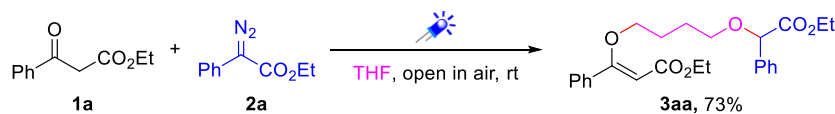

To a 10 mL Schlenk flask was added ethyl 3-oxo-3-phenylpropanoate **1a** (0.4 mmol, 77 mg) and THF (2 mL), followed by ethyl 2-diazo-2-phenylacetate **2a** (0.6 mmol, 114 mg). Then Schlenk tube was open in air. The mixture was stirred under the blue LEDs for 6 h. The solvents were evaporated in vacuo, and the residue was purified by flash column chromatography, eluting with petroleum ether and ethyl acetate (10:1) to afford the desired product **3aa** (124 mg, 73% yield).

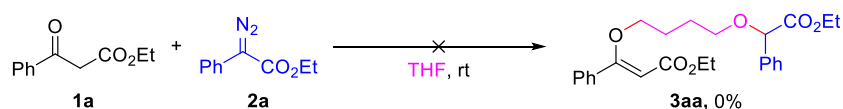

To a 10 mL Schlenk flask was added ethyl 3-oxo-3-phenylpropanoate **1a** (0.4 mmol, 77 mg) and THF (2 mL), followed by ethyl 2-diazo-2-phenylacetate **2a** (0.6 mmol, 114 mg). Then Schlenk tube was open in air. The mixture was stirred without blue LEDs for 6 h. The **3aa** was not detected.

## Radical Trapping Experiments

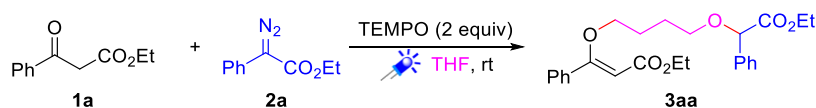

To a 10 mL Schlenk flask was added ethyl 3-oxo-3-phenylpropanoate **1a** (0.4 mmol, 77 mg) and THF (2 mL), followed by ethyl 2-diazo-2-phenylacetate **2a** (0.6 mmol, 114 mg) and TEMPO (0.8 mmol, 125 mg). Then Schlenk tube was tightly screw capped. The mixture was stirred under the blue LEDs for 6 h. The solvents were evaporated in vacuo, and the residue was purified by flash column chromatography, eluting with petroleum ether and ethyl acetate (10:1) to afford the desired product **3aa** (123 mg, 72% yield).

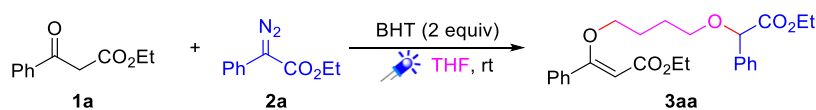

To a 10 mL Schlenk flask was added ethyl 3-oxo-3-phenylpropanoate **1a** (0.4 mmol, 77



mg) and THF (2 mL), followed by ethyl 2-diazo-2-phenylacetate **2a** (0.6 mmol, 114 mg) and BHT (0.8 mmol, 176 mg). Then Schlenk tube was tightly screw capped. The mixture was stirred under the blue LEDs for 6 h. The solvents were evaporated in vacuo, and the residue was purified by flash column chromatography, eluting with petroleum ether and ethyl acetate (10:1) to afford the desired product **3aa** (128 mg, 75% yield).

### Computational Details

All the theoretical calculations in the study were performed using Gaussian16 program package.<sup>1</sup> All the geometries were optimized at the M06-2X<sup>2</sup>/6-31G(d, p) level, and the solvent effect was utilized the polarizable continuum model using the integral equation formalism model (IEFPCM) in THF solvent.<sup>3</sup> And the harmonic vibrational frequency calculations were performed at the same level to confirm the local minima and transition state.

### References

- (1) Frisch, M. J.; Trucks, G. W.; Schlegel, H. B.; Scuseria, G. E.; Robb, M. A.; Cheeseman, J. R.; Scalmani, G.; Barone, V.; Petersson, G. A.; Nakatsuji, H.; Li, X.; Caricato, M.; Marenich, A. V.; Bloino, J.; Janesko, B. G.; Gomperts, R.; Mennucci, B.; Hratchian, H. P.; Ortiz, J. V.; Izmaylov, A. F.; Sonnenberg, J. L.; Williams-Young, D.; Ding, F.; Lipparini, F.; Egidi, F.; Goings, J.; Peng, B.; Petrone, A.; Henderson, T.; Ranasinghe, D.; Zakrzewski, V. G.; Gao, J.; Rega, N.; Zheng, G.; Liang, W.; Hada, M.; Ehara, M.; Toyota, K.; Fukuda, R.; Hasegawa, J.; Ishida, M.; Nakajima, T.; Honda, Y.; Kitao, O.; Nakai, H.; Vreven, T.; Throssell, K.; Montgomery, J. A., Jr.; Peralta, J. E.; Ogliaro, F.; Bearpark, M. J.; Heyd, J. J.; Brothers, E. N.; Kudin, K. N.; Staroverov, V. N.; Keith, T. A.; Kobayashi, R.; Normand, J.; Raghavachari, K.; Rendell, A. P.; Burant, J. C.; Iyengar, S. S.; Tomasi, J.; Cossi, M.; Millam, J. M.; Klene, M.; Adamo, C.; Cammi, R.; Ochterski, J. W.; Martin, R. L.; Morokuma, K.; Farkas, O.; Foresman, J. B.; and Fox, D. J.; *Gaussian 16, Revision A.03*, Gaussian, Inc., Wallingford CT, **2016**.
- (2) Zhao, Y.; Truhlar, D. G. *Theor. Chem. Acc.* **2008**, *120*, 215–241.
- (3) Scalmani, G.; Frisch, M. J. *J. Chem. Phys.* **2010**, *132*, 11411–11424.

**Table S1. The charges of the enolate species.**

|                 | O        | C        |
|-----------------|----------|----------|
| Mulliken charge | -0.656 e | -0.366 e |
| NPA charge      | -0.731   | -0.630   |

**Table S2. The free energies for the species.**

| Species | G(au)       |
|---------|-------------|
| Carb    | -537.071256 |

|      |              |
|------|--------------|
| THF  | -232.258114  |
| TS1  | -769.318636  |
| M1   | -769.364624  |
| R1   | -651.657947  |
| M2   | -1421.013908 |
| TS2  | -1420.989636 |
| M3   | -1421.019177 |
| TS3  | -1421.000904 |
| TS3' | -1420.990011 |
| P1   | -1421.063405 |
| P2   | -1421.091027 |

**Table S3. Reaction Coordinates**

| <b>Carbene</b> |                 |                 |                 |
|----------------|-----------------|-----------------|-----------------|
| C              | -3.525404000000 | -0.266488000000 | -0.667144000000 |
| C              | -2.345622000000 | -0.986392000000 | -0.763591000000 |
| C              | -1.156622000000 | -0.518641000000 | -0.152584000000 |
| C              | -1.200667000000 | 0.704297000000  | 0.567987000000  |
| C              | -2.379090000000 | 1.420464000000  | 0.668328000000  |
| C              | -3.535463000000 | 0.932632000000  | 0.048427000000  |
| H              | -4.433429000000 | -0.626357000000 | -1.137626000000 |
| H              | -2.296684000000 | -1.923393000000 | -1.308602000000 |
| H              | -0.296182000000 | 1.068235000000  | 1.048176000000  |
| H              | -2.412521000000 | 2.353343000000  | 1.219844000000  |
| H              | -4.459034000000 | 1.498378000000  | 0.126404000000  |
| C              | 0.020126000000  | -1.303489000000 | -0.317608000000 |
| C              | 1.218205000000  | -0.825735000000 | 0.348988000000  |
| O              | 1.500779000000  | -1.155955000000 | 1.488933000000  |
| O              | 2.010936000000  | -0.086601000000 | -0.441892000000 |
| C              | 3.271925000000  | 0.303682000000  | 0.135175000000  |
| C              | 4.014665000000  | 1.100891000000  | -0.913215000000 |
| H              | 3.818751000000  | -0.595772000000 | 0.430751000000  |
| H              | 3.080007000000  | 0.892438000000  | 1.036812000000  |
| H              | 4.975618000000  | 1.432068000000  | -0.513243000000 |
| H              | 4.198857000000  | 0.492663000000  | -1.801493000000 |
| H              | 3.438576000000  | 1.981516000000  | -1.205934000000 |
| <b>THF</b>     |                 |                 |                 |
| C              | -1.160548000000 | 0.425737000000  | 0.137066000000  |
| O              | 0.000000000000  | 1.245939000000  | -0.000001000000 |
| C              | 1.160549000000  | 0.425737000000  | -0.137065000000 |
| C              | 0.726671000000  | -0.989757000000 | 0.237998000000  |
| C              | -0.726672000000 | -0.989756000000 | -0.237999000000 |
| H              | -1.512784000000 | 0.462944000000  | 1.177209000000  |

|            |                 |                 |                 |
|------------|-----------------|-----------------|-----------------|
| H          | -1.950614000000 | 0.820859000000  | -0.508688000000 |
| H          | 1.512788000000  | 0.462944000000  | -1.177207000000 |
| H          | 1.950613000000  | 0.820857000000  | 0.508692000000  |
| H          | 1.343272000000  | -1.758025000000 | -0.232271000000 |
| H          | 0.768765000000  | -1.125415000000 | 1.323360000000  |
| H          | -0.768766000000 | -1.125412000000 | -1.323361000000 |
| H          | -1.343274000000 | -1.758024000000 | 0.232269000000  |
| <b>TS1</b> |                 |                 |                 |
| C          | 0.765368000000  | -2.612870000000 | -0.895078000000 |
| O          | 0.017114000000  | -2.055980000000 | 0.179430000000  |
| C          | 0.893183000000  | -1.738080000000 | 1.263738000000  |
| C          | 2.319606000000  | -2.040303000000 | 0.783321000000  |
| C          | 2.166736000000  | -2.037497000000 | -0.740824000000 |
| H          | 0.779269000000  | -3.710969000000 | -0.820248000000 |
| H          | 0.274154000000  | -2.321501000000 | -1.827196000000 |
| H          | 0.763818000000  | -0.675896000000 | 1.500912000000  |
| H          | 0.618273000000  | -2.331244000000 | 2.143426000000  |
| H          | 3.039914000000  | -1.304922000000 | 1.146656000000  |
| H          | 2.637862000000  | -3.029335000000 | 1.127711000000  |
| H          | 2.179875000000  | -1.012061000000 | -1.120803000000 |
| H          | 2.930230000000  | -2.625438000000 | -1.254619000000 |
| C          | -4.120553000000 | 0.136701000000  | 0.805260000000  |
| C          | -3.233597000000 | 1.135562000000  | 1.219428000000  |
| C          | -2.007004000000 | 1.261904000000  | 0.589453000000  |
| C          | -1.651377000000 | 0.397300000000  | -0.475297000000 |
| C          | -2.571646000000 | -0.599612000000 | -0.873558000000 |
| C          | -3.794368000000 | -0.733468000000 | -0.237483000000 |
| H          | -3.507298000000 | 1.800827000000  | 2.030871000000  |
| H          | -1.311663000000 | 2.038996000000  | 0.895665000000  |
| H          | -2.280647000000 | -1.256715000000 | -1.686482000000 |
| H          | -4.495350000000 | -1.502038000000 | -0.543491000000 |
| C          | -0.407995000000 | 0.456386000000  | -1.172828000000 |
| C          | 0.513194000000  | 1.514628000000  | -0.808547000000 |
| O          | 0.384400000000  | 2.633616000000  | -1.282266000000 |
| O          | 1.553596000000  | 1.139958000000  | -0.047847000000 |
| C          | 2.564693000000  | 2.145907000000  | 0.157132000000  |
| H          | 2.128862000000  | 2.976480000000  | 0.719798000000  |
| H          | 2.882849000000  | 2.527995000000  | -0.816213000000 |
| H          | -5.080499000000 | 0.037075000000  | 1.303009000000  |
| C          | 3.701976000000  | 1.490148000000  | 0.906243000000  |
| H          | 3.356595000000  | 1.097395000000  | 1.866016000000  |
| H          | 4.122446000000  | 0.668657000000  | 0.320595000000  |
| H          | 4.491129000000  | 2.221695000000  | 1.094100000000  |
| <b>M1</b>  |                 |                 |                 |

|           |                 |                 |                 |
|-----------|-----------------|-----------------|-----------------|
| C         | -3.809342000000 | 1.077330000000  | 0.065526000000  |
| C         | -2.420343000000 | 1.027775000000  | 0.070576000000  |
| C         | -1.732353000000 | -0.204194000000 | 0.028928000000  |
| C         | -2.512747000000 | -1.382281000000 | -0.016954000000 |
| C         | -3.899449000000 | -1.314939000000 | -0.020618000000 |
| C         | -4.567295000000 | -0.090457000000 | 0.019664000000  |
| H         | -4.303049000000 | 2.044737000000  | 0.099542000000  |
| H         | -1.857272000000 | 1.955723000000  | 0.110911000000  |
| H         | -2.005133000000 | -2.338223000000 | -0.050720000000 |
| H         | -4.469369000000 | -2.239565000000 | -0.055989000000 |
| H         | -5.651239000000 | -0.048548000000 | 0.016299000000  |
| C         | -0.295051000000 | -0.254663000000 | 0.029307000000  |
| C         | 0.573893000000  | -1.357337000000 | -0.024733000000 |
| O         | 0.272033000000  | -2.551387000000 | -0.068579000000 |
| O         | 1.902412000000  | -0.964342000000 | -0.011435000000 |
| C         | 2.854452000000  | -2.025692000000 | -0.069400000000 |
| C         | 4.228441000000  | -1.395966000000 | 0.021398000000  |
| H         | 2.726542000000  | -2.580228000000 | -1.004780000000 |
| H         | 2.674509000000  | -2.724318000000 | 0.753122000000  |
| H         | 5.001569000000  | -2.165941000000 | -0.033918000000 |
| H         | 4.383610000000  | -0.690855000000 | -0.799836000000 |
| H         | 4.342597000000  | -0.858732000000 | 0.966833000000  |
| C         | 0.908286000000  | 1.575477000000  | -1.205387000000 |
| O         | 0.345359000000  | 1.027844000000  | 0.047020000000  |
| C         | 1.099146000000  | 1.496127000000  | 1.238398000000  |
| C         | 2.266369000000  | 2.248956000000  | 0.630578000000  |
| C         | 1.707341000000  | 2.759512000000  | -0.705956000000 |
| H         | 1.524475000000  | 0.784009000000  | -1.633026000000 |
| H         | 0.049740000000  | 1.806846000000  | -1.834362000000 |
| H         | 0.401883000000  | 2.125874000000  | 1.792697000000  |
| H         | 1.367478000000  | 0.602985000000  | 1.796261000000  |
| H         | 2.604751000000  | 3.056348000000  | 1.280607000000  |
| H         | 3.093926000000  | 1.557489000000  | 0.453159000000  |
| H         | 1.055415000000  | 3.623417000000  | -0.550234000000 |
| H         | 2.493059000000  | 3.034181000000  | -1.410576000000 |
| <b>1a</b> |                 |                 |                 |
| C         | 0.797774000000  | 1.603646000000  | -0.359209000000 |
| O         | 1.333581000000  | 2.672760000000  | -0.151762000000 |
| C         | 1.541448000000  | 0.316254000000  | -0.202968000000 |
| C         | 2.851637000000  | 0.368524000000  | 0.283050000000  |
| C         | 0.972452000000  | -0.918693000000 | -0.529438000000 |
| C         | 3.584565000000  | -0.799798000000 | 0.443748000000  |
| H         | 3.274801000000  | 1.336435000000  | 0.530238000000  |
| C         | 1.709551000000  | -2.088528000000 | -0.370667000000 |

|           |                 |                 |                 |
|-----------|-----------------|-----------------|-----------------|
| H         | -0.043121000000 | -0.981394000000 | -0.910550000000 |
| C         | 3.013161000000  | -2.029640000000 | 0.116081000000  |
| H         | 4.599822000000  | -0.755661000000 | 0.823617000000  |
| H         | 1.265870000000  | -3.044854000000 | -0.626350000000 |
| H         | 3.585066000000  | -2.943672000000 | 0.240329000000  |
| C         | -0.658715000000 | 1.547074000000  | -0.801882000000 |
| H         | -1.020428000000 | 2.575886000000  | -0.867795000000 |
| H         | -0.757708000000 | 1.077322000000  | -1.783347000000 |
| C         | -1.497461000000 | 0.810852000000  | 0.220330000000  |
| O         | -1.330188000000 | 0.894282000000  | 1.414388000000  |
| O         | -2.441821000000 | 0.060683000000  | -0.352267000000 |
| C         | -3.293689000000 | -0.668707000000 | 0.554660000000  |
| C         | -4.257768000000 | -1.473557000000 | -0.286323000000 |
| H         | -3.806833000000 | 0.047553000000  | 1.202112000000  |
| H         | -2.663785000000 | -1.303122000000 | 1.184001000000  |
| H         | -4.916797000000 | -2.053221000000 | 0.363472000000  |
| H         | -4.871196000000 | -0.816973000000 | -0.906935000000 |
| H         | -3.715998000000 | -2.164659000000 | -0.935956000000 |
| <b>M2</b> |                 |                 |                 |
| C         | -0.310849000000 | -1.795876000000 | -2.538487000000 |
| C         | 0.428094000000  | -0.846071000000 | -1.841393000000 |
| C         | 1.428938000000  | -1.231013000000 | -0.922577000000 |
| C         | 1.643560000000  | -2.615219000000 | -0.734114000000 |
| C         | 0.903122000000  | -3.549594000000 | -1.445641000000 |
| C         | -0.078710000000 | -3.157084000000 | -2.357472000000 |
| H         | -1.083407000000 | -1.461590000000 | -3.225161000000 |
| H         | 0.208311000000  | 0.208447000000  | -1.982565000000 |
| H         | 2.400726000000  | -2.933370000000 | -0.027939000000 |
| H         | 1.096116000000  | -4.607157000000 | -1.281866000000 |
| H         | -0.655062000000 | -3.896051000000 | -2.904478000000 |
| C         | 2.197162000000  | -0.241795000000 | -0.209333000000 |
| C         | 3.281471000000  | -0.422483000000 | 0.672244000000  |
| O         | 3.654202000000  | -1.473248000000 | 1.194964000000  |
| O         | 3.922482000000  | 0.770586000000  | 0.953383000000  |
| C         | 5.000123000000  | 0.678559000000  | 1.885262000000  |
| C         | 5.561259000000  | 2.074172000000  | 2.057091000000  |
| H         | 5.754145000000  | -0.016575000000 | 1.503798000000  |
| H         | 4.629583000000  | 0.272555000000  | 2.831592000000  |
| H         | 6.396700000000  | 2.061084000000  | 2.760979000000  |
| H         | 5.921416000000  | 2.463965000000  | 1.101126000000  |
| H         | 4.795312000000  | 2.752370000000  | 2.442965000000  |
| C         | 2.971694000000  | 1.550164000000  | -1.786722000000 |
| O         | 2.051033000000  | 1.092435000000  | -0.723488000000 |
| C         | 1.605141000000  | 2.221443000000  | 0.135810000000  |

|            |                 |                 |                 |
|------------|-----------------|-----------------|-----------------|
| C          | 2.470181000000  | 3.371219000000  | -0.341018000000 |
| C          | 2.712651000000  | 3.040748000000  | -1.820959000000 |
| H          | 3.975988000000  | 1.292696000000  | -1.448229000000 |
| H          | 2.689150000000  | 0.991256000000  | -2.678130000000 |
| H          | 0.543849000000  | 2.341043000000  | -0.086640000000 |
| H          | 1.781257000000  | 1.905977000000  | 1.161201000000  |
| H          | 1.971592000000  | 4.330740000000  | -0.200496000000 |
| H          | 3.416940000000  | 3.370677000000  | 0.205114000000  |
| H          | 1.825279000000  | 3.263260000000  | -2.419490000000 |
| H          | 3.563684000000  | 3.580733000000  | -2.237880000000 |
| C          | -2.155242000000 | 1.148737000000  | -0.023385000000 |
| O          | -1.542239000000 | 1.778507000000  | -0.867965000000 |
| C          | -3.593190000000 | 1.442746000000  | 0.252526000000  |
| C          | -4.215429000000 | 2.451091000000  | -0.491073000000 |
| C          | -4.321263000000 | 0.758615000000  | 1.230889000000  |
| C          | -5.546890000000 | 2.771803000000  | -0.260254000000 |
| H          | -3.636436000000 | 2.971770000000  | -1.246279000000 |
| C          | -5.654197000000 | 1.081415000000  | 1.462612000000  |
| H          | -3.860232000000 | -0.031148000000 | 1.814599000000  |
| C          | -6.267361000000 | 2.086528000000  | 0.718250000000  |
| H          | -6.025280000000 | 3.554604000000  | -0.839477000000 |
| H          | -6.213968000000 | 0.547472000000  | 2.222972000000  |
| H          | -7.307683000000 | 2.336333000000  | 0.900726000000  |
| C          | -1.449436000000 | 0.075551000000  | 0.785233000000  |
| H          | -1.605647000000 | 0.224574000000  | 1.858939000000  |
| C          | -1.934857000000 | -1.313094000000 | 0.419624000000  |
| O          | -2.827625000000 | -1.548048000000 | -0.361668000000 |
| O          | -1.267214000000 | -2.239918000000 | 1.101923000000  |
| C          | -1.665804000000 | -3.604677000000 | 0.864920000000  |
| C          | -0.731857000000 | -4.484072000000 | 1.663668000000  |
| H          | -1.599123000000 | -3.800693000000 | -0.207294000000 |
| H          | -2.709117000000 | -3.719082000000 | 1.175382000000  |
| H          | -0.984098000000 | -5.534505000000 | 1.500712000000  |
| H          | 0.300427000000  | -4.317504000000 | 1.347550000000  |
| H          | -0.811847000000 | -4.268714000000 | 2.731747000000  |
| H          | -0.373532000000 | 0.123440000000  | 0.595125000000  |
| <b>TS2</b> |                 |                 |                 |
| C          | 1.818193000000  | 2.160070000000  | 2.931141000000  |
| C          | 1.159989000000  | 1.481647000000  | 1.907897000000  |
| C          | 1.545258000000  | 0.176843000000  | 1.585042000000  |
| C          | 2.599174000000  | -0.431934000000 | 2.276009000000  |
| C          | 3.252075000000  | 0.250812000000  | 3.296037000000  |
| C          | 2.857522000000  | 1.546575000000  | 3.626183000000  |
| H          | 1.524408000000  | 3.175574000000  | 3.174667000000  |

|   |                 |                 |                 |
|---|-----------------|-----------------|-----------------|
| H | 0.368035000000  | 1.977418000000  | 1.347988000000  |
| H | 2.921674000000  | -1.433354000000 | 2.003009000000  |
| H | 4.070704000000  | -0.223763000000 | 3.826568000000  |
| H | 3.370616000000  | 2.082118000000  | 4.418559000000  |
| C | 0.813229000000  | -0.557447000000 | 0.512830000000  |
| C | 1.627865000000  | -1.411337000000 | -0.414593000000 |
| O | 2.746024000000  | -1.121619000000 | -0.765403000000 |
| O | 0.945779000000  | -2.475818000000 | -0.855005000000 |
| C | 1.626961000000  | -3.297796000000 | -1.829015000000 |
| C | 0.710150000000  | -4.453874000000 | -2.154069000000 |
| H | 2.575370000000  | -3.627740000000 | -1.397930000000 |
| H | 1.845192000000  | -2.680996000000 | -2.704647000000 |
| H | 1.184464000000  | -5.101658000000 | -2.894151000000 |
| H | 0.503691000000  | -5.047001000000 | -1.259519000000 |
| H | -0.235303000000 | -4.092873000000 | -2.566029000000 |
| C | -0.093869000000 | -2.441497000000 | 1.983525000000  |
| O | -0.329370000000 | -1.296041000000 | 1.069452000000  |
| C | -1.561958000000 | -1.501358000000 | 0.240359000000  |
| C | -1.940990000000 | -2.932502000000 | 0.551789000000  |
| C | -1.447038000000 | -3.123998000000 | 1.991209000000  |
| H | 0.688955000000  | -3.053135000000 | 1.530673000000  |
| H | 0.228076000000  | -2.011636000000 | 2.930166000000  |
| H | -2.273522000000 | -0.761222000000 | 0.608833000000  |
| H | -1.281120000000 | -1.304959000000 | -0.792245000000 |
| H | -3.017610000000 | -3.077081000000 | 0.453771000000  |
| H | -1.420785000000 | -3.613643000000 | -0.126220000000 |
| H | -2.115809000000 | -2.631745000000 | 2.701333000000  |
| H | -1.350076000000 | -4.174146000000 | 2.268241000000  |
| C | -1.577786000000 | 2.356777000000  | -0.487495000000 |
| O | -1.385112000000 | 3.210393000000  | 0.395922000000  |
| C | -2.890542000000 | 1.590169000000  | -0.444164000000 |
| C | -3.569840000000 | 1.562288000000  | 0.777670000000  |
| C | -3.405747000000 | 0.853294000000  | -1.515809000000 |
| C | -4.709269000000 | 0.779602000000  | 0.943659000000  |
| H | -3.168248000000 | 2.155106000000  | 1.592962000000  |
| C | -4.548812000000 | 0.073999000000  | -1.355285000000 |
| H | -2.920397000000 | 0.888350000000  | -2.485925000000 |
| C | -5.196235000000 | 0.023111000000  | -0.121337000000 |
| H | -5.216259000000 | 0.755444000000  | 1.903527000000  |
| H | -4.936970000000 | -0.492646000000 | -2.196133000000 |
| H | -6.081822000000 | -0.592088000000 | 0.004458000000  |
| C | -0.634779000000 | 1.922415000000  | -1.457725000000 |
| H | -0.914857000000 | 1.189362000000  | -2.202341000000 |
| C | 0.725374000000  | 2.396261000000  | -1.522272000000 |

|           |                 |                 |                 |
|-----------|-----------------|-----------------|-----------------|
| O         | 1.265787000000  | 3.285324000000  | -0.883201000000 |
| O         | 1.447410000000  | 1.628244000000  | -2.404291000000 |
| C         | 2.852525000000  | 1.871369000000  | -2.424107000000 |
| C         | 3.461408000000  | 0.906967000000  | -3.420166000000 |
| H         | 3.258466000000  | 1.712616000000  | -1.419144000000 |
| H         | 3.043176000000  | 2.914262000000  | -2.698526000000 |
| H         | 4.540771000000  | 1.065216000000  | -3.485942000000 |
| H         | 3.279518000000  | -0.122661000000 | -3.102453000000 |
| H         | 3.028653000000  | 1.054166000000  | -4.413082000000 |
| H         | 0.139718000000  | 0.426109000000  | -0.344140000000 |
| <b>M3</b> |                 |                 |                 |
| C         | -1.696003000000 | -4.163343000000 | -1.492217000000 |
| C         | -1.239749000000 | -2.930349000000 | -1.037690000000 |
| C         | -2.144524000000 | -1.883280000000 | -0.840491000000 |
| C         | -3.501656000000 | -2.069618000000 | -1.107354000000 |
| C         | -3.952892000000 | -3.304175000000 | -1.566621000000 |
| C         | -3.052420000000 | -4.350398000000 | -1.755303000000 |
| H         | -0.993452000000 | -4.975133000000 | -1.648990000000 |
| H         | -0.185530000000 | -2.752307000000 | -0.837166000000 |
| H         | -4.201755000000 | -1.249659000000 | -0.977030000000 |
| H         | -5.006978000000 | -3.448160000000 | -1.779254000000 |
| H         | -3.407742000000 | -5.310657000000 | -2.115080000000 |
| C         | -1.595036000000 | -0.599258000000 | -0.291255000000 |
| C         | -2.377028000000 | 0.665922000000  | -0.585033000000 |
| O         | -2.818372000000 | 0.902579000000  | -1.680833000000 |
| O         | -2.435330000000 | 1.489079000000  | 0.459516000000  |
| C         | -2.784271000000 | 2.854365000000  | 0.146607000000  |
| C         | -2.491565000000 | 3.677800000000  | 1.378941000000  |
| H         | -3.838021000000 | 2.891970000000  | -0.141480000000 |
| H         | -2.170280000000 | 3.155936000000  | -0.705605000000 |
| H         | -2.706990000000 | 4.730162000000  | 1.180248000000  |
| H         | -3.104632000000 | 3.354054000000  | 2.223984000000  |
| H         | -1.436235000000 | 3.584131000000  | 1.650711000000  |
| C         | -2.540166000000 | -1.066270000000 | 2.029710000000  |
| O         | -1.381211000000 | -0.776934000000 | 1.159996000000  |
| C         | -0.350506000000 | 0.060709000000  | 1.866959000000  |
| C         | -1.056424000000 | 0.425111000000  | 3.155871000000  |
| C         | -1.985600000000 | -0.768229000000 | 3.408051000000  |
| H         | -3.340331000000 | -0.383136000000 | 1.737682000000  |
| H         | -2.812797000000 | -2.103438000000 | 1.843455000000  |
| H         | 0.498940000000  | -0.609436000000 | 1.986724000000  |
| H         | -0.110765000000 | 0.878887000000  | 1.190260000000  |
| H         | -0.338995000000 | 0.574379000000  | 3.963657000000  |
| H         | -1.639236000000 | 1.339397000000  | 3.020319000000  |



|            |                 |                 |                 |
|------------|-----------------|-----------------|-----------------|
| H          | -1.423139000000 | -1.627289000000 | 3.782417000000  |
| H          | -2.789145000000 | -0.541097000000 | 4.109350000000  |
| C          | 2.299861000000  | -0.185751000000 | -0.283662000000 |
| O          | 1.262880000000  | -0.901444000000 | -0.344162000000 |
| C          | 3.600882000000  | -0.922860000000 | -0.032797000000 |
| C          | 3.539649000000  | -2.164749000000 | 0.606396000000  |
| C          | 4.849844000000  | -0.436528000000 | -0.432143000000 |
| C          | 4.696918000000  | -2.891015000000 | 0.868668000000  |
| H          | 2.564042000000  | -2.546429000000 | 0.889822000000  |
| C          | 6.009200000000  | -1.166230000000 | -0.182185000000 |
| H          | 4.916966000000  | 0.506037000000  | -0.965802000000 |
| C          | 5.937821000000  | -2.392329000000 | 0.475820000000  |
| H          | 4.632251000000  | -3.848783000000 | 1.376410000000  |
| H          | 6.969695000000  | -0.779625000000 | -0.508812000000 |
| H          | 6.842371000000  | -2.958756000000 | 0.674388000000  |
| C          | 2.371965000000  | 1.209987000000  | -0.390203000000 |
| H          | 3.328144000000  | 1.701163000000  | -0.277904000000 |
| C          | 1.272318000000  | 2.063199000000  | -0.693135000000 |
| O          | 0.074083000000  | 1.785264000000  | -0.814510000000 |
| O          | 1.677624000000  | 3.363220000000  | -0.849417000000 |
| C          | 0.654789000000  | 4.305303000000  | -1.156908000000 |
| C          | 1.327726000000  | 5.643213000000  | -1.384321000000 |
| H          | -0.061814000000 | 4.356373000000  | -0.327661000000 |
| H          | 0.103315000000  | 3.975727000000  | -2.043623000000 |
| H          | 0.581167000000  | 6.405509000000  | -1.619838000000 |
| H          | 1.873699000000  | 5.955945000000  | -0.490937000000 |
| H          | 2.033795000000  | 5.579529000000  | -2.215682000000 |
| H          | -0.572736000000 | -0.416767000000 | -0.653520000000 |
| <b>TS3</b> |                 |                 |                 |
| C          | -5.828556000000 | -0.918891000000 | -1.191666000000 |
| C          | -4.466377000000 | -0.659638000000 | -1.296898000000 |
| C          | -3.716485000000 | -0.363385000000 | -0.156423000000 |
| C          | -4.339976000000 | -0.332064000000 | 1.091073000000  |
| C          | -5.704814000000 | -0.588412000000 | 1.195208000000  |
| C          | -6.449227000000 | -0.882427000000 | 0.055848000000  |
| H          | -6.405803000000 | -1.144655000000 | -2.082011000000 |
| H          | -3.976944000000 | -0.686821000000 | -2.266685000000 |
| H          | -3.768949000000 | -0.093477000000 | 1.983690000000  |
| H          | -6.185285000000 | -0.556331000000 | 2.167368000000  |
| H          | -7.513022000000 | -1.079520000000 | 0.138783000000  |
| C          | -2.226660000000 | -0.167229000000 | -0.314478000000 |
| C          | -1.593439000000 | 0.645202000000  | 0.818580000000  |
| O          | -2.004973000000 | 1.742226000000  | 1.109327000000  |
| O          | -0.550794000000 | 0.049624000000  | 1.384580000000  |

|   |                 |                 |                 |
|---|-----------------|-----------------|-----------------|
| C | 0.206942000000  | 0.849979000000  | 2.325732000000  |
| C | 1.388455000000  | 0.014451000000  | 2.758713000000  |
| H | -0.450740000000 | 1.111964000000  | 3.158661000000  |
| H | 0.508735000000  | 1.766172000000  | 1.809915000000  |
| H | 1.985767000000  | 0.573451000000  | 3.482633000000  |
| H | 1.055674000000  | -0.914976000000 | 3.227987000000  |
| H | 2.018548000000  | -0.221240000000 | 1.896602000000  |
| C | -1.742741000000 | -2.512051000000 | 0.387046000000  |
| O | -1.585120000000 | -1.430334000000 | -0.556175000000 |
| C | 0.176300000000  | -1.373982000000 | -1.078850000000 |
| C | 0.581754000000  | -2.627880000000 | -0.353813000000 |
| C | -0.668512000000 | -3.476928000000 | -0.076249000000 |
| H | -1.561917000000 | -2.139648000000 | 1.399453000000  |
| H | -2.757272000000 | -2.905405000000 | 0.299070000000  |
| H | -0.067032000000 | -1.395669000000 | -2.131242000000 |
| H | 0.327033000000  | -0.417779000000 | -0.622069000000 |
| H | 1.296843000000  | -3.175422000000 | -0.969169000000 |
| H | 1.072929000000  | -2.348954000000 | 0.583779000000  |
| H | -0.998648000000 | -3.971586000000 | -0.994264000000 |
| H | -0.474662000000 | -4.243775000000 | 0.675536000000  |
| C | 2.668232000000  | 0.000228000000  | -0.977848000000 |
| O | 2.137489000000  | -0.913478000000 | -1.690296000000 |
| C | 4.040530000000  | -0.317637000000 | -0.432540000000 |
| C | 4.379113000000  | -1.659468000000 | -0.233987000000 |
| C | 4.986287000000  | 0.667950000000  | -0.131742000000 |
| C | 5.621794000000  | -2.010099000000 | 0.283708000000  |
| H | 3.648966000000  | -2.418843000000 | -0.494159000000 |
| C | 6.234957000000  | 0.318794000000  | 0.374988000000  |
| H | 4.753253000000  | 1.711480000000  | -0.318791000000 |
| C | 6.553692000000  | -1.020446000000 | 0.591217000000  |
| H | 5.866177000000  | -3.055591000000 | 0.444924000000  |
| H | 6.963668000000  | 1.093223000000  | 0.593321000000  |
| H | 7.526702000000  | -1.291924000000 | 0.988682000000  |
| C | 2.105859000000  | 1.219288000000  | -0.594704000000 |
| H | -2.005584000000 | 0.410537000000  | -1.220200000000 |
| H | 2.640179000000  | 1.822881000000  | 0.127098000000  |
| C | 0.890786000000  | 1.805605000000  | -1.093797000000 |
| O | 0.116993000000  | 1.384936000000  | -1.951893000000 |
| O | 0.635972000000  | 2.989894000000  | -0.460443000000 |
| C | -0.527930000000 | 3.701630000000  | -0.887415000000 |
| C | -0.775893000000 | 4.797337000000  | 0.126426000000  |
| H | -1.378351000000 | 3.017860000000  | -0.939606000000 |
| H | -0.353584000000 | 4.104213000000  | -1.891558000000 |
| H | -1.645214000000 | 5.390721000000  | -0.166986000000 |

|             |                 |                 |                 |
|-------------|-----------------|-----------------|-----------------|
| H           | -0.971090000000 | 4.355147000000  | 1.106508000000  |
| H           | 0.088551000000  | 5.461448000000  | 0.203136000000  |
| <b>TS3'</b> |                 |                 |                 |
| C           | -4.883139000000 | -2.875523000000 | -1.421873000000 |
| C           | -3.767286000000 | -2.045062000000 | -1.407921000000 |
| C           | -3.644021000000 | -1.053187000000 | -0.432501000000 |
| C           | -4.642981000000 | -0.900158000000 | 0.529724000000  |
| C           | -5.760170000000 | -1.730699000000 | 0.512898000000  |
| C           | -5.880713000000 | -2.718605000000 | -0.460754000000 |
| H           | -4.976888000000 | -3.641010000000 | -2.184737000000 |
| H           | -2.986213000000 | -2.165307000000 | -2.153502000000 |
| H           | -4.562213000000 | -0.126942000000 | 1.288392000000  |
| H           | -6.535341000000 | -1.603826000000 | 1.260926000000  |
| H           | -6.753044000000 | -3.363591000000 | -0.473690000000 |
| C           | -2.376012000000 | -0.230920000000 | -0.397400000000 |
| C           | -2.551425000000 | 1.109645000000  | 0.322650000000  |
| O           | -3.387620000000 | 1.905972000000  | -0.022398000000 |
| O           | -1.666601000000 | 1.300869000000  | 1.297263000000  |
| C           | -1.647764000000 | 2.607291000000  | 1.920527000000  |
| C           | -0.287208000000 | 2.762702000000  | 2.560683000000  |
| H           | -2.465576000000 | 2.648433000000  | 2.644536000000  |
| H           | -1.831989000000 | 3.358309000000  | 1.148146000000  |
| H           | -0.214394000000 | 3.743255000000  | 3.037284000000  |
| H           | -0.125958000000 | 1.996815000000  | 3.323119000000  |
| H           | 0.494854000000  | 2.685598000000  | 1.798339000000  |
| C           | -1.419662000000 | -1.697590000000 | 1.378715000000  |
| O           | -1.288167000000 | -1.020906000000 | 0.108098000000  |
| C           | 0.411848000000  | -0.326118000000 | 0.007980000000  |
| C           | 0.908177000000  | -0.968093000000 | 1.278680000000  |
| C           | 0.000817000000  | -2.161950000000 | 1.620648000000  |
| H           | -1.762349000000 | -0.984013000000 | 2.133618000000  |
| H           | -2.138766000000 | -2.510423000000 | 1.263693000000  |
| H           | 0.618615000000  | -0.763937000000 | -0.964413000000 |
| H           | 0.063264000000  | 0.693311000000  | 0.051062000000  |
| H           | 1.937854000000  | -1.305904000000 | 1.147044000000  |
| H           | 0.884347000000  | -0.229794000000 | 2.084974000000  |
| H           | 0.225767000000  | -3.003707000000 | 0.959818000000  |
| H           | 0.142508000000  | -2.486243000000 | 2.652831000000  |
| C           | 2.986843000000  | -0.327213000000 | -1.200281000000 |
| O           | 2.559178000000  | -0.980778000000 | -2.166339000000 |
| C           | 4.139044000000  | -0.912041000000 | -0.409202000000 |
| C           | 4.340975000000  | -2.294022000000 | -0.480218000000 |
| C           | 5.006974000000  | -0.140679000000 | 0.369957000000  |
| C           | 5.375868000000  | -2.897617000000 | 0.226049000000  |

|            |                 |                 |                 |
|------------|-----------------|-----------------|-----------------|
| H          | 3.670933000000  | -2.876649000000 | -1.104049000000 |
| C          | 6.052052000000  | -0.741389000000 | 1.067818000000  |
| H          | 4.884923000000  | 0.937009000000  | 0.411704000000  |
| C          | 6.235141000000  | -2.120995000000 | 1.002567000000  |
| H          | 5.517318000000  | -3.972501000000 | 0.169227000000  |
| H          | 6.726215000000  | -0.130644000000 | 1.660093000000  |
| H          | 7.047513000000  | -2.589172000000 | 1.549603000000  |
| C          | 2.408066000000  | 0.875366000000  | -0.696825000000 |
| H          | 2.815170000000  | 1.331727000000  | 0.196147000000  |
| C          | 1.463558000000  | 1.667252000000  | -1.431114000000 |
| O          | 0.885799000000  | 1.404821000000  | -2.474926000000 |
| O          | 1.138040000000  | 2.804653000000  | -0.722063000000 |
| C          | 0.078567000000  | 3.594571000000  | -1.261247000000 |
| C          | 0.091385000000  | 4.929714000000  | -0.546774000000 |
| H          | -0.877282000000 | 3.070220000000  | -1.114770000000 |
| H          | 0.219335000000  | 3.713460000000  | -2.338344000000 |
| H          | -0.725808000000 | 5.557810000000  | -0.909436000000 |
| H          | -0.024322000000 | 4.801089000000  | 0.533222000000  |
| H          | 1.036094000000  | 5.447724000000  | -0.727609000000 |
| H          | -2.063212000000 | 0.023772000000  | -1.417024000000 |
| <b>3aa</b> |                 |                 |                 |
| C          | 6.102761000000  | -0.269036000000 | 1.214867000000  |
| C          | 4.715994000000  | -0.264668000000 | 1.090145000000  |
| C          | 4.115474000000  | -0.207641000000 | -0.169354000000 |
| C          | 4.926808000000  | -0.119395000000 | -1.304254000000 |
| C          | 6.313164000000  | -0.119829000000 | -1.177338000000 |
| C          | 6.906529000000  | -0.201723000000 | 0.080290000000  |
| H          | 6.553311000000  | -0.320756000000 | 2.201000000000  |
| H          | 4.087825000000  | -0.293040000000 | 1.974640000000  |
| H          | 4.477351000000  | -0.056031000000 | -2.288132000000 |
| H          | 6.931544000000  | -0.057005000000 | -2.067178000000 |
| H          | 7.987621000000  | -0.205730000000 | 0.175138000000  |
| C          | 2.600859000000  | -0.124953000000 | -0.258874000000 |
| C          | 1.982622000000  | -0.892563000000 | -1.443430000000 |
| O          | 2.572533000000  | -1.496261000000 | -2.305751000000 |
| O          | 0.652133000000  | -0.805027000000 | -1.377732000000 |
| C          | -0.086771000000 | -1.556002000000 | -2.359857000000 |
| C          | -1.549572000000 | -1.422802000000 | -2.003558000000 |
| H          | 0.254019000000  | -2.595058000000 | -2.327897000000 |
| H          | 0.138772000000  | -1.154850000000 | -3.352010000000 |
| H          | -2.159877000000 | -2.006648000000 | -2.696159000000 |
| H          | -1.727820000000 | -1.792894000000 | -0.989321000000 |
| H          | -1.867608000000 | -0.378586000000 | -2.046101000000 |
| C          | 1.941522000000  | -1.898248000000 | 1.208839000000  |

|             |                 |                 |                 |
|-------------|-----------------|-----------------|-----------------|
| O           | 1.948208000000  | -0.500257000000 | 0.933439000000  |
| C           | -0.867538000000 | -0.507100000000 | 1.610060000000  |
| C           | -0.513039000000 | -1.950427000000 | 1.930623000000  |
| C           | 0.951045000000  | -2.151184000000 | 2.330476000000  |
| H           | 1.636956000000  | -2.463894000000 | 0.315056000000  |
| H           | 2.948014000000  | -2.233482000000 | 1.488388000000  |
| H           | -0.522207000000 | 0.173002000000  | 2.390386000000  |
| H           | -0.444857000000 | -0.182347000000 | 0.656150000000  |
| H           | -1.155931000000 | -2.277642000000 | 2.755266000000  |
| H           | -0.750719000000 | -2.587783000000 | 1.068401000000  |
| H           | 1.204528000000  | -1.499652000000 | 3.175455000000  |
| H           | 1.088092000000  | -3.182296000000 | 2.671636000000  |
| C           | -2.916854000000 | 0.347210000000  | 0.643745000000  |
| O           | -2.303673000000 | -0.449015000000 | 1.528308000000  |
| C           | -4.200554000000 | -0.241612000000 | 0.178661000000  |
| C           | -4.385801000000 | -1.628239000000 | 0.225303000000  |
| C           | -5.236035000000 | 0.568045000000  | -0.302058000000 |
| C           | -5.571222000000 | -2.195325000000 | -0.230495000000 |
| H           | -3.593062000000 | -2.254737000000 | 0.620203000000  |
| C           | -6.419968000000 | -0.000869000000 | -0.757476000000 |
| H           | -5.123082000000 | 1.647228000000  | -0.296406000000 |
| C           | -6.588928000000 | -1.384065000000 | -0.727408000000 |
| H           | -5.700983000000 | -3.272113000000 | -0.196876000000 |
| H           | -7.216843000000 | 0.637581000000  | -1.124331000000 |
| H           | -7.514740000000 | -1.826139000000 | -1.081282000000 |
| C           | -2.465670000000 | 1.526116000000  | 0.148022000000  |
| H           | 2.316363000000  | 0.924887000000  | -0.413587000000 |
| H           | -2.994557000000 | 1.946410000000  | -0.697728000000 |
| C           | -1.384598000000 | 2.357235000000  | 0.683641000000  |
| O           | -0.912436000000 | 2.316853000000  | 1.803449000000  |
| O           | -0.995302000000 | 3.270756000000  | -0.229182000000 |
| C           | 0.005272000000  | 4.199528000000  | 0.211381000000  |
| C           | 0.272401000000  | 5.150261000000  | -0.934349000000 |
| H           | 0.902870000000  | 3.643993000000  | 0.499676000000  |
| H           | -0.360638000000 | 4.721643000000  | 1.100586000000  |
| H           | 1.036400000000  | 5.874946000000  | -0.644141000000 |
| H           | 0.626383000000  | 4.605202000000  | -1.812439000000 |
| H           | -0.636239000000 | 5.693109000000  | -1.204251000000 |
| <b>3aa'</b> |                 |                 |                 |
| C           | -6.531747000000 | -1.723571000000 | -1.212695000000 |
| C           | -5.267533000000 | -1.171971000000 | -1.390444000000 |
| C           | -4.743249000000 | -0.275583000000 | -0.455313000000 |
| C           | -5.501818000000 | 0.056471000000  | 0.667100000000  |
| C           | -6.769988000000 | -0.493712000000 | 0.845613000000  |

|   |                 |                 |                 |
|---|-----------------|-----------------|-----------------|
| C | -7.287246000000 | -1.383471000000 | -0.091458000000 |
| H | -6.928082000000 | -2.416632000000 | -1.947701000000 |
| H | -4.671349000000 | -1.442303000000 | -2.258089000000 |
| H | -5.113938000000 | 0.755803000000  | 1.400703000000  |
| H | -7.352521000000 | -0.225883000000 | 1.721165000000  |
| H | -8.274931000000 | -1.810496000000 | 0.049463000000  |
| C | -3.316544000000 | 0.203002000000  | -0.678618000000 |
| C | -2.972350000000 | 1.462472000000  | 0.122646000000  |
| O | -3.694584000000 | 2.431917000000  | 0.163781000000  |
| O | -1.778031000000 | 1.400842000000  | 0.709963000000  |
| C | -1.380390000000 | 2.581244000000  | 1.435395000000  |
| C | -0.039599000000 | 2.289487000000  | 2.068594000000  |
| H | -2.151070000000 | 2.807945000000  | 2.177229000000  |
| H | -1.333253000000 | 3.418924000000  | 0.733431000000  |
| H | 0.294240000000  | 3.161320000000  | 2.636670000000  |
| H | -0.113940000000 | 1.439978000000  | 2.752432000000  |
| H | 0.707091000000  | 2.069669000000  | 1.301340000000  |
| C | -2.427958000000 | -1.531220000000 | 0.703510000000  |
| O | -2.369660000000 | -0.827462000000 | -0.532693000000 |
| C | 0.599453000000  | -0.904986000000 | -0.192299000000 |
| C | 0.121588000000  | -1.718586000000 | 1.011699000000  |
| C | -1.213384000000 | -2.436589000000 | 0.802131000000  |
| H | -2.444596000000 | -0.821062000000 | 1.543185000000  |
| H | -3.349715000000 | -2.126129000000 | 0.744397000000  |
| H | 0.559190000000  | -1.514434000000 | -1.100895000000 |
| H | -0.061923000000 | -0.046623000000 | -0.337151000000 |
| H | 0.880198000000  | -2.470457000000 | 1.253797000000  |
| H | 0.041539000000  | -1.054187000000 | 1.883373000000  |
| H | -1.166869000000 | -3.055166000000 | -0.102456000000 |
| H | -1.384216000000 | -3.119224000000 | 1.642106000000  |
| C | 3.072071000000  | -1.529616000000 | -0.158375000000 |
| O | 2.734378000000  | -2.642203000000 | -0.507191000000 |
| C | 4.507070000000  | -1.216298000000 | 0.133737000000  |
| C | 5.446488000000  | -2.240685000000 | -0.025197000000 |
| C | 4.930193000000  | 0.049827000000  | 0.552421000000  |
| C | 6.790678000000  | -2.005019000000 | 0.231315000000  |
| H | 5.099382000000  | -3.214669000000 | -0.353101000000 |
| C | 6.278371000000  | 0.284552000000  | 0.807767000000  |
| H | 4.220386000000  | 0.861856000000  | 0.680469000000  |
| C | 7.207403000000  | -0.740730000000 | 0.648915000000  |
| H | 7.515702000000  | -2.802244000000 | 0.105884000000  |
| H | 6.602677000000  | 1.267704000000  | 1.131637000000  |
| H | 8.257605000000  | -0.554729000000 | 0.849825000000  |
| C | 2.040666000000  | -0.407031000000 | -0.010512000000 |

|   |                 |                |                 |
|---|-----------------|----------------|-----------------|
| H | 2.151882000000  | 0.054684000000 | 0.977526000000  |
| C | 2.329677000000  | 0.638545000000 | -1.069166000000 |
| O | 2.618402000000  | 0.381781000000 | -2.214565000000 |
| O | 2.184852000000  | 1.882060000000 | -0.597896000000 |
| C | 2.369248000000  | 2.947350000000 | -1.551631000000 |
| C | 2.151553000000  | 4.247786000000 | -0.812548000000 |
| H | 1.654392000000  | 2.810187000000 | -2.367262000000 |
| H | 3.377947000000  | 2.869569000000 | -1.966288000000 |
| H | 2.288488000000  | 5.087900000000 | -1.496705000000 |
| H | 1.138896000000  | 4.294980000000 | -0.404616000000 |
| H | 2.865034000000  | 4.347998000000 | 0.008539000000  |
| H | -3.227039000000 | 0.520243000000 | -1.725631000000 |

### Typical Experimental Procedure A and Data of the Enol Ethers

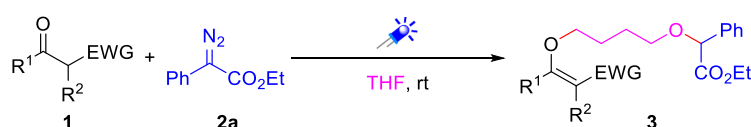

To a 10 mL Schlenk flask was added ethyl 1,3-dicarbonyl **1** (0.4 mmol) and THF (2 mL), followed by ethyl 2-diazo-2-phenylacetate **2a** (0.6 mmol, 114 mg). Then Schlenk tube was tightly screw capped. The mixture was stirred under the blue LEDs for 6 h. The solvents were evaporated in vacuo, and the residue was purified by flash column chromatography, eluting with petroleum ether and ethyl acetate (10:1) to afford the desired product **3**.

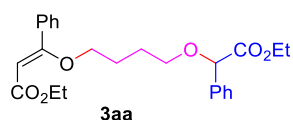

**Ethyl (Z)-3-(4-(2-ethoxy-2-oxo-1-phenylethoxy)butoxy)-3-phenylacrylate (3aa, new compound):** The reaction was performed following the general procedure. The residue was purified by flash column chromatography (10:1 PE/EA) to give the product as a colorless oil (133 mg, 78%);  $^1\text{H NMR}$  (400 MHz,  $\text{CDCl}_3$ )  $\delta$  7.61 – 7.48 (m, 2 H), 7.47 – 7.28 (m, 8 H), 5.52 (s, 1 H), 4.84 (s, 1 H), 4.30 – 4.07 (m, 4 H), 4.01 – 3.97 (m, 2 H), 3.71 – 3.42 (m, 2 H), 2.00 – 1.79 (m, 4 H), 1.29 (t,  $J = 7.1$  Hz, 3 H), 1.20 (t,  $J = 7.1$  Hz, 3 H).  $^{13}\text{C}\{^1\text{H}\}$  NMR (100 MHz,  $d_6$ -DMSO)  $\delta$  170.5, 166.8, 164.3, 136.9, 134.6, 130.4, 128.6, 128.4, 128.3, 127.04, 126.95, 99.8, 80.0, 72.4, 68.7, 60.5, 59.1, 26.3, 25.5, 14.2, 13.9. HRMS (ESI)  $m/z$ :  $[\text{M} + \text{H}]^+$  Calcd for  $\text{C}_{25}\text{H}_{31}\text{O}_6$  427.2115, found 427.2113.

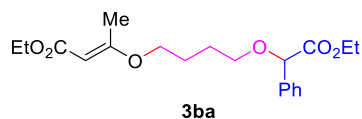

**Ethyl (*E*)-3-(4-(2-ethoxy-2-oxo-1-phenylethoxy)butoxy)but-2-enoate (3ba, new compound):**

The reaction was performed following the general procedure. The residue was purified by flash column chromatography (10:1 PE/EA) to give the product as a colorless oil (61 mg, 42%); <sup>1</sup>H NMR (400 MHz, CDCl<sub>3</sub>) δ 7.48 – 7.40 (m, 2 H), 7.39 – 7.27 (m, 3 H), 4.98 (s, 1 H), 4.84 (s, 1 H), 4.28 – 4.03 (m, 4 H), 3.77 (dd, *J* = 6.1, 5.2 Hz, 2 H), 3.58 (dt, *J* = 8.9, 6.1 Hz, 1 H), 3.48 (dt, *J* = 8.9, 6.0 Hz, 1 H), 2.26 (s, 3 H), 1.94 – 1.63 (m, 4 H), 1.26 (t, *J* = 7.1 Hz, 3 H), 1.21 (t, *J* = 7.1 Hz, 3 H). <sup>13</sup>C{<sup>1</sup>H} NMR (100 MHz, CDCl<sub>3</sub>) δ 172.1, 170.7, 167.8, 136.5, 128.4, 128.3, 126.9, 91.0, 80.9, 69.0, 67.6, 60.9, 59.0, 26.0, 25.3, 18.8, 14.2, 13.9. HRMS (ESI) *m/z*: [M + Na]<sup>+</sup> Calcd for C<sub>20</sub>H<sub>28</sub>NaO<sub>6</sub> 387.1778, found 387.1786.

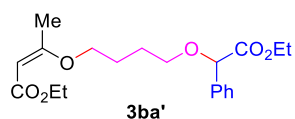

**Ethyl (*Z*)-3-(4-(2-ethoxy-2-oxo-1-phenylethoxy)butoxy)but-2-enoate (3ba', new compound):**

The reaction was performed following the general procedure. The residue was purified by flash column chromatography (10:1 PE/EA) to give the product as a colorless oil (61 mg, 42%); <sup>1</sup>H NMR (400 MHz, CDCl<sub>3</sub>) δ 7.48 – 7.41 (m, 2 H), 7.39 – 7.30 (m, 3 H), 4.86 (s, 1 H), 4.84 (s, 1 H), 4.21 – 4.03 (m, 6 H), 3.63 – 3.58 (m, 1 H), 3.52 – 3.47 (m, 1 H), 1.96 (s, 3 H), 1.91 – 1.72 (m, 4 H), 1.25 – 1.22 (m, 3 H), 1.21 – 1.18 (m, 3 H). <sup>13</sup>C{<sup>1</sup>H} NMR (100 MHz, CDCl<sub>3</sub>) δ 170.8, 167.4, 165.3, 136.6, 128.4 (2C, overlap), 127.0, 95.7, 80.8, 69.1, 68.4, 60.9, 58.8, 26.4, 25.7, 19.4, 14.3, 13.9. HRMS (ESI) *m/z*: [M + Na]<sup>+</sup> Calcd for C<sub>20</sub>H<sub>28</sub>NaO<sub>6</sub> 387.1778, found 387.1788.

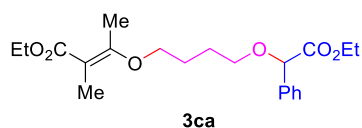

**Ethyl (*E*)-3-(4-(2-ethoxy-2-oxo-1-phenylethoxy)butoxy)-2-methylbut-2-enoate (3ca, new compound):**

The reaction was performed following the general procedure. The residue was purified by flash column chromatography (10:1 PE/EA) to give the product as a colorless oil (139 mg, 92%); <sup>1</sup>H NMR (400 MHz, CDCl<sub>3</sub>) δ 7.51 – 7.41 (m, 2 H), 7.40 – 7.29 (m, 3 H), 4.84



(s, 1 H), 4.21 – 4.11 (m, 4 H), 3.99 – 3.85 (m, 2 H), 3.66 – 3.54 (m, 1 H), 3.51 – 3.46 (m, 1 H), 2.33 (d,  $J = 1.2$  Hz, 3 H), 1.84 – 1.74 (m, 7 H), 1.27 (t,  $J = 7.1$  Hz, 3 H), 1.20 (t,  $J = 7.1$  Hz, 3 H).  $^{13}\text{C}\{^1\text{H}\}$  NMR (100 MHz,  $\text{CDCl}_3$ )  $\delta$  170.8, 169.7, 163.9, 136.6, 128.5, 128.4, 127.0, 106.0, 81.0, 69.2, 66.8, 61.0, 59.5, 26.5, 26.0, 15.1, 14.3, 14.0, 11.5. HRMS (ESI)  $m/z$ :  $[\text{M} + \text{Na}]^+$  Calcd for  $\text{C}_{21}\text{H}_{30}\text{NaO}_6$  401.1935, found 401.1930.

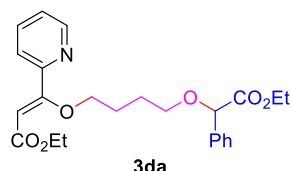

**Ethyl (Z)-3-(4-(2-ethoxy-2-oxo-1-phenylethoxy)butoxy)-3-(pyridin-2-yl)acrylate (3da, new compound):** The reaction was performed following the general procedure. The residue was purified by flash column chromatography (10:1 PE/EA) to give the product as a colorless oil (137 mg, 80%);  $^1\text{H}$  NMR (400 MHz,  $\text{CDCl}_3$ )  $\delta$  8.60 – 8.59 (m, 1 H), 7.72 – 7.71 (m, 2 H), 7.44 (dd,  $J = 7.7, 1.6$  Hz, 2 H), 7.40 – 7.27 (m, 4 H), 6.46 (s, 1 H), 4.85 (s, 1 H), 4.22 – 4.11 (m, 6 H), 3.61 (dt,  $J = 8.9, 6.1$  Hz, 1 H), 3.51 (dt,  $J = 9.0, 6.1$  Hz, 1 H), 2.01 – 1.79 (m, 4 H), 1.29 (t,  $J = 7.1$  Hz, 3 H), 1.20 (t,  $J = 7.1$  Hz, 3 H).  $^{13}\text{C}\{^1\text{H}\}$  NMR (100 MHz,  $d_6$ -DMSO)  $\delta$  170.5, 164.5, 163.7, 151.8, 149.5, 137.5, 136.9, 128.40, 128.36, 127.0, 125.1, 121.1, 99.8, 80.0, 73.5, 68.7, 60.6, 59.5, 26.4, 25.6, 14.1, 13.9. HRMS (ESI)  $m/z$ :  $[\text{M} + \text{H}]^+$  Calcd for  $\text{C}_{24}\text{H}_{30}\text{NO}_6$  428.2068, found 428.2058.

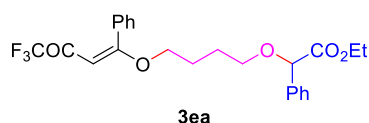

**Ethyl (E)-2-phenyl-2-(4-((4,4,4-trifluoro-3-oxo-1-phenylbut-1-en-1-yl)oxy)butoxy)acetate (3ea, new compound):** The reaction was performed following the general procedure. The residue was purified by flash column chromatography (10:1 PE/EA) to give the product as a colorless oil (92 mg, 51%);  $^1\text{H}$  NMR (400 MHz,  $d_6$ -DMSO)  $\delta$  8.04 – 7.91 (m, 2 H), 7.82 – 7.62 (m, 1 H), 7.57 – 7.53 (m, 2 H), 7.44 – 7.27 (m, 5 H), 6.63 (s, 1 H), 4.99 (s, 1 H), 4.20 – 4.04 (m, 4 H), 3.57 (dt,  $J = 9.0, 6.3$  Hz, 1 H), 3.49 (dt,  $J = 9.1, 6.1$  Hz, 1 H), 1.91 – 1.76 (m, 2 H), 1.75 –

1.63 (m, 2 H), 1.13 (t,  $J = 7.1$  Hz, 3 H).  $^{13}\text{C}\{^1\text{H}\}$  NMR (100 MHz,  $d_6$ -DMSO)  $\delta$  189.2, 170.6, 149.6 (q,  $J = 35.2$  Hz), 136.9, 136.8, 133.7, 128.8, 128.7, 128.4, 128.4, 127.0, 119.4 (dd,  $J = 552.4$ , 276.2 Hz), 105.2, 80.1, 69.8, 68.6, 60.6, 25.5, 24.8, 13.9. HRMS (ESI)  $m/z$ :  $[\text{M} + \text{H}]^+$  Calcd for  $\text{C}_{24}\text{H}_{26}\text{F}_3\text{O}_5$  451.1727, found 451.1711.

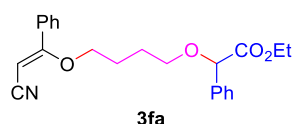

**Ethyl (Z)-2-(4-((2-cyano-1-phenylvinyl)oxy)butoxy)-2-phenylacetate (3fa, new compound):**

The reaction was performed following the general procedure. The residue was purified by flash column chromatography (10:1 PE/EA) to give the product as a colorless oil (129 mg, 85%);  $^1\text{H}$  NMR (400 MHz,  $d_6$ -DMSO)  $\delta$  7.68 – 7.60 (m, 2 H), 7.55 – 7.43 (m, 3 H), 7.41 – 7.31 (m, 5 H), 5.53 (s, 1 H), 4.98 (s, 1 H), 4.36 (t,  $J = 6.2$  Hz, 2 H), 4.19 – 3.97 (m, 2 H), 3.58 – 3.44 (m, 2 H), 1.87 – 1.77 (m, 2 H), 1.77 – 1.64 (m, 2 H), 1.12 (t,  $J = 7.1$  Hz, 3 H).  $^{13}\text{C}\{^1\text{H}\}$  NMR (100 MHz,  $d_6$ -DMSO)  $\delta$  170.5, 169.8, 136.9, 133.2, 131.1, 128.7, 128.42, 128.38, 127.0, 126.6, 117.5, 80.0, 73.3, 71.6, 68.6, 60.6, 26.1, 25.4, 13.9. HRMS (ESI)  $m/z$ :  $[\text{M} + \text{H}]^+$  Calcd for  $\text{C}_{23}\text{H}_{26}\text{NO}_4$  380.1856, found 380.1830.

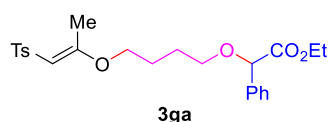

**Ethyl (E)-2-phenyl-2-(4-((1-tosylprop-1-en-2-yl)oxy)butoxy)acetate (3ga, new compound):**

The reaction was performed following the general procedure. The residue was purified by flash column chromatography (10:1 PE/EA) to give the product as a colorless oil (91 mg, 51%);  $^1\text{H}$  NMR (400 MHz,  $\text{CD}_3\text{OD}$ )  $\delta$  7.76 (d,  $J = 8.3$  Hz, 2 H), 7.49 – 7.15 (m, 7 H), 5.68 (s, 1 H), 4.89 (s, 1 H), 4.22 – 4.00 (m, 2 H), 3.80 – 3.79 (m, 2 H), 3.61 – 3.40 (m, 2 H), 2.42 – 2.41 (m, 3 H), 2.15 (s, 3 H), 1.79 – 1.70 (m, 4 H), 1.16 (td,  $J = 7.1, 1.9$  Hz, 3 H).  $^{13}\text{C}\{^1\text{H}\}$  NMR (100 MHz,  $\text{CD}_3\text{OD}$ )  $\delta$  172.7, 170.9, 144.9, 142.4, 138.2, 130.8, 129.7, 129.6, 128.3, 127.6, 104.1, 82.1, 70.2, 70.0, 62.2, 26.9, 26.5, 21.5, 18.5, 14.4. HRMS (ESI)  $m/z$ :  $[\text{M} + \text{Na}]^+$  Calcd for  $\text{C}_{24}\text{H}_{30}\text{NaO}_6\text{S}$  469.1655, found 469.1665.

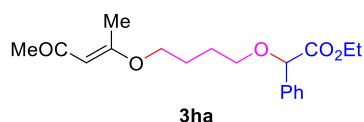

**Ethyl (E)-2-(4-((4-oxopent-2-en-2-yl)oxy)butoxy)-2-phenylacetate (3ha, new compound):**

The reaction was performed following the general procedure. The residue was purified by flash column chromatography (10:1 PE/EA) to give the product as a colorless oil (72 mg, 54%); <sup>1</sup>H NMR (400 MHz, *d*<sub>6</sub>-DMSO) δ 7.47 – 7.30 (m, 5 H), 5.60 (s, 1 H), 4.98 (s, 1 H), 4.26 – 4.01 (m, 2 H), 3.84 (t, *J* = 6.3 Hz, 2 H), 3.56 – 3.41 (m, 2 H), 2.16 – 2.13 (m, 3 H), 2.06 (s, 3 H), 1.76 – 1.52 (m, 4 H), 1.13 (t, *J* = 7.1 Hz, 3 H). <sup>13</sup>C{<sup>1</sup>H} NMR (100 MHz, *d*<sub>6</sub>-DMSO) δ 196.0, 170.5, 170.4, 136.9, 128.41, 128.38, 127.0, 100.0, 80.0, 68.6, 67.7, 60.6, 31.7, 25.6, 25.0, 19.1, 13.9. HRMS (ESI) *m/z*: [M + Na]<sup>+</sup> Calcd for C<sub>19</sub>H<sub>26</sub>NaO<sub>5</sub> 357.1672, found 357.1671.

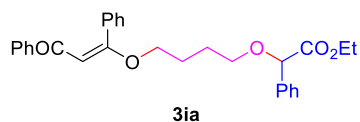

**Ethyl (E)-2-(4-((3-oxo-1,3-diphenylprop-1-en-1-yl)oxy)butoxy)-2-phenylacetate (3ia, new compound):**

The reaction was performed following the general procedure. The residue was purified by flash column chromatography (10:1 PE/EA) to give the product as a colorless oil (112 mg, 61%); <sup>1</sup>H NMR (400 MHz, *d*<sub>6</sub>-DMSO) δ 7.96 – 7.84 (m, 2 H), 7.56 (t, *J* = 7.3 Hz, 1 H), 7.46 (t, *J* = 7.6 Hz, 2 H), 7.42 – 7.30 (m, 10 H), 6.38 (s, 1 H), 4.99 (s, 1 H), 4.19 (t, *J* = 6.3 Hz, 2 H), 4.14 – 4.03 (m, 2 H), 3.58 (dt, *J* = 8.9, 6.2 Hz, 1 H), 3.49 (dt, *J* = 9.0, 6.0 Hz, 1 H), 1.92 – 1.80 (m, 2 H), 1.79 – 1.68 (m, 2 H), 1.12 (t, *J* = 7.1 Hz, 3 H). <sup>13</sup>C{<sup>1</sup>H} NMR (100 MHz, *d*<sub>6</sub>-DMSO) δ 188.9, 170.6, 169.9, 139.2, 136.9, 135.7, 132.1, 129.4, 128.8, 128.40, 128.36 (2C, overlap), 127.9, 127.6, 127.0, 98.6, 80.1, 69.0, 68.7, 60.6, 25.7, 25.3, 13.9. HRMS (ESI) *m/z*: [M + H]<sup>+</sup> Calcd for C<sub>29</sub>H<sub>31</sub>O<sub>5</sub> 459.2166, found 459.2176.

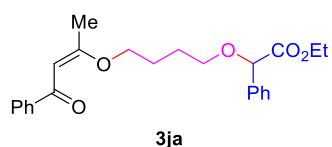

**Ethyl (Z)-2-(4-((4-oxo-4-phenylbut-2-en-2-yl)oxy)butoxy)-2-phenylacetate (3ja, new compound):**

The reaction was performed following the general procedure. The residue was purified by flash column chromatography (10:1 PE/EA) to give the product as a colorless oil (97

mg, 61%);  $^1\text{H}$  NMR (400 MHz,  $\text{CD}_3\text{OD}$ )  $\delta$  7.98 – 7.80 (m, 2 H), 7.64 – 7.48 (m, 1 H), 7.44 – 7.41 (m, 4 H), 7.35 – 7.26 (m, 3 H), 6.25 (s, 1 H), 4.91 (s, 1 H), 4.21 – 4.07 (m, 2 H), 4.06 – 3.92 (m, 2 H), 3.59 (dt,  $J = 9.0, 6.1$  Hz, 1 H), 3.48 (dt,  $J = 9.1, 5.9$  Hz, 1 H), 2.36 (s, 3 H), 1.98 – 1.81 (m, 2 H), 1.80 – 1.67 (m, 2 H), 1.14 (t,  $J = 7.1$  Hz, 3 H).  $^{13}\text{C}\{^1\text{H}\}$  NMR (100 MHz,  $\text{CD}_3\text{OD}$ )  $\delta$  192.4, 176.1, 172.7, 141.6, 138.2, 133.0, 129.6, 129.52, 129.48, 128.7, 128.2, 97.6, 82.1, 70.3, 69.6, 62.2, 27.0, 26.8, 20.8, 14.4. HRMS (ESI)  $m/z$ :  $[\text{M} + \text{Na}]^+$  Calcd for  $\text{C}_{24}\text{H}_{28}\text{NaO}_5$  419.1829, found 419.1845.

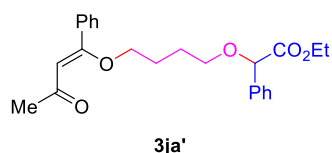

**Ethyl (Z)-2-(4-((3-oxo-1-phenylbut-1-en-1-yl)oxy)butoxy)-2-phenylacetate (3ja', new compound):** The reaction was performed following the general procedure. The residue was purified by flash column chromatography (10:1 PE/EA) to give the product as a colorless oil (54 mg, 34%);  $^1\text{H}$  NMR (400 MHz,  $\text{CD}_3\text{OD}$ )  $\delta$  7.50 – 7.27 (m, 10 H), 5.71 (s, 1 H), 4.91 (s, 1 H), 4.22 – 4.08 (m, 2 H), 4.04 (t,  $J = 6.2$  Hz, 2 H), 3.61 (dt,  $J = 9.0, 6.2$  Hz, 1 H), 3.50 (dt,  $J = 9.1, 6.0$  Hz, 1 H), 2.06 – 1.85 (m, 5 H), 1.85 – 1.70 (m, 2 H), 1.17 (t,  $J = 7.1$  Hz, 3 H).  $^{13}\text{C}\{^1\text{H}\}$  NMR (100 MHz,  $\text{CD}_3\text{OD}$ )  $\delta$  200.2, 172.8, 172.5, 138.2, 137.1, 131.0, 130.1, 129.7, 129.6, 129.0, 128.3, 104.1, 82.2, 70.4, 70.3, 62.3, 30.9, 27.2, 26.8, 14.4. HRMS (ESI)  $m/z$ :  $[\text{M} + \text{Na}]^+$  Calcd for  $\text{C}_{24}\text{H}_{28}\text{NaO}_5$  419.1829, found 419.1761.

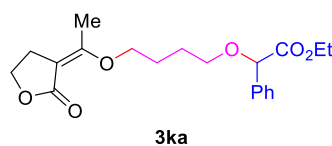

**Ethyl (Z)-2-(4-(1-(2-oxodihydrofuran-3(2H)-ylidene)ethoxy)butoxy)-2-phenylacetate (3ka, new compound):** The reaction was performed following the general procedure. The residue was purified by flash column chromatography (10:1 PE/EA) to give the product as a colorless oil (90 mg, 62%);  $^1\text{H}$  NMR (400 MHz,  $\text{CD}_3\text{OD}$ )  $\delta$  7.89 (dd,  $J = 7.8, 1.6$  Hz, 2 H), 7.86 – 7.72 (m, 3 H), 5.38 (d,  $J = 7.4$  Hz, 1 H), 5.31 (d,  $J = 6.3$  Hz, 1 H), 4.79 – 4.51 (m, 6 H), 4.08 (dt,  $J = 9.1, 5.9$  Hz, 1 H), 3.97 (dt,  $J = 9.1, 5.7$  Hz, 1 H), 3.78 (dt,  $J = 3.2, 1.6$  Hz, 1 H), 2.88 (s, 3 H), 2.39 – 2.15

(m, 4 H), 1.65 (td,  $J = 7.1, 1.1$  Hz, 3 H).  $^{13}\text{C}\{^1\text{H}\}$  NMR (100 MHz,  $\text{CD}_3\text{OD}$ )  $\delta$  175.1, 172.7, 168.0, 138.2, 129.7, 129.6, 128.3, 100.7, 82.1, 70.4, 68.4, 66.0, 62.2, 27.6, 27.0, 26.6, 14.4, 13.0. HRMS (ESI)  $m/z$ :  $[\text{M} + \text{Na}]^+$  Calcd for  $\text{C}_{20}\text{H}_{26}\text{NaO}_6$  385.1622, found 385.1620.

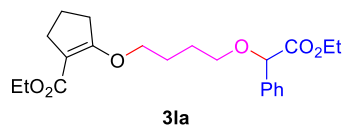

**Ethyl 2-(4-(2-ethoxy-2-oxo-1-phenylethoxy)butoxy)cyclopent-1-ene-1-carboxylate (3la**, new compound): The reaction was performed following the general procedure. The residue was purified by flash column chromatography (10:1 PE/EA) to give the product as a colorless oil (151 mg, 97%);  $^1\text{H}$  NMR (400 MHz,  $\text{CD}_3\text{OD}$ )  $\delta$  7.41 (dd,  $J = 7.7, 1.5$  Hz, 2 H), 7.38 – 7.25 (m, 3 H), 4.91 (s, 1 H), 4.27 – 3.99 (m, 6 H), 3.56 – 3.63 (m, 1 H), 3.51 – 3.47 (m, 1 H), 2.62 (t,  $J = 7.7$  Hz, 2 H), 2.48 (t,  $J = 7.4$  Hz, 2 H), 1.91 – 1.65 (m, 6 H), 1.23 (t,  $J = 7.1$  Hz, 3 H), 1.17 (t,  $J = 7.1$  Hz, 3 H).  $^{13}\text{C}\{^1\text{H}\}$  NMR (100 MHz,  $\text{CD}_3\text{OD}$ )  $\delta$  172.5, 171.5, 167.1, 138.2, 129.52, 129.45, 128.2, 104.1, 81.9, 71.2, 70.2, 62.1, 60.2, 32.2, 30.0, 27.6, 26.8, 20.2, 14.8, 14.4. HRMS (ESI)  $m/z$ :  $[\text{M} + \text{Na}]^+$  Calcd for  $\text{C}_{22}\text{H}_{30}\text{NaO}_6$  413.1935, found 413.1945.

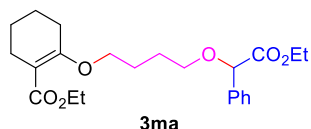

**Ethyl 2-(4-(2-ethoxy-2-oxo-1-phenylethoxy)butoxy)cyclohex-1-ene-1-carboxylate (3ma**, new compound): The reaction was performed following the general procedure. The residue was purified by flash column chromatography (10:1 PE/EA) to give the product as a colorless oil (89 mg, 55%);  $^1\text{H}$  NMR (400 MHz,  $\text{CDCl}_3$ )  $\delta$  7.44 (dd,  $J = 7.8, 1.5$  Hz, 2 H), 7.40 – 7.28 (m, 3 H), 4.84 (s, 1 H), 4.33 – 4.04 (m, 4 H), 3.97 – 3.76 (m, 2 H), 3.61 – 3.56 (m, 1 H), 3.48 (dt,  $J = 8.0, 5.6$  Hz, 1 H), 2.38 – 2.17 (m, 4 H), 1.83 – 1.73 (m, 4 H), 1.73 – 1.61 (m, 2 H), 1.60 – 1.49 (m, 2 H), 1.25 (t,  $J = 7.1$  Hz, 3 H), 1.20 (t,  $J = 7.1$  Hz, 3 H).  $^{13}\text{C}\{^1\text{H}\}$  NMR (100 MHz,  $\text{CDCl}_3$ )  $\delta$  170.8, 167.9, 161.6, 136.7, 128.3 (2C, overlap), 126.9, 107.8, 80.9, 69.2, 67.6, 60.9, 59.6, 26.5, 26.5, 25.9, 25.3, 22.4, 22.0, 14.2, 13.9. HRMS (ESI)  $m/z$ :  $[\text{M} + \text{Na}]^+$  Calcd for  $\text{C}_{23}\text{H}_{32}\text{NaO}_6$  427.2091, found 427.2102.

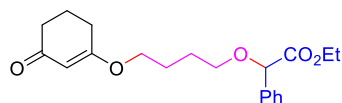

3na

**Ethyl 2-(4-((3-oxocyclohex-1-en-1-yl)oxy)butoxy)-2-phenylacetate (3na, new compound):**

The reaction was performed following the general procedure. The residue was purified by flash column chromatography (10:1 PE/EA) to give the product as a colorless oil (129 mg, 93%); <sup>1</sup>H NMR (400 MHz, CDCl<sub>3</sub>) δ 7.43 – 7.40 (m, 2 H), 7.39 – 7.27 (m, 3 H), 5.31 (s, 1 H), 4.82 (s, 1 H), 4.27 – 4.05 (m, 2 H), 3.84 (t, *J* = 6.2 Hz, 2 H), 3.57 (dt, *J* = 8.9, 6.1 Hz, 1 H), 3.47 (dt, *J* = 8.9, 6.0 Hz, 1 H), 2.37 – 2.29 (m, 4 H), 2.06 – 1.90 (m, 2 H), 1.90 – 1.80 (m, 2 H), 1.78 – 1.71 (m, 2 H), 1.19 (t, *J* = 7.1 Hz, 3 H). <sup>13</sup>C{<sup>1</sup>H} NMR (100 MHz, CDCl<sub>3</sub>) δ 199.3, 177.6, 170.5, 136.3, 128.2 (2C, overlap), 126.8, 102.4, 80.8, 68.8, 67.8, 60.8, 36.4, 28.7, 25.8, 25.1, 20.9, 13.8. HRMS (ESI) *m/z*: [M + Na]<sup>+</sup> Calcd for C<sub>20</sub>H<sub>26</sub>NaO<sub>5</sub> 369.1672, found 369.1682.

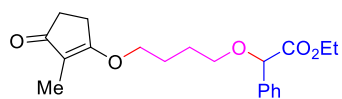

3oa

**Ethyl 2-(4-((2-methyl-3-oxocyclopent-1-en-1-yl)oxy)butoxy)-2-phenylacetate (3oa, new compound):**

The reaction was performed following the general procedure. The residue was purified by flash column chromatography (10:1 PE/EA) to give the product as a colorless oil (133 mg, 96%); <sup>1</sup>H NMR (400 MHz, CDCl<sub>3</sub>) δ 7.45 – 7.39 (m, 2 H), 7.38 – 7.28 (m, 3 H), 4.83 (s, 1 H), 4.27 – 4.01 (m, 4 H), 3.60 (dt, *J* = 9.0, 6.1 Hz, 1 H), 3.50 (dt, *J* = 9.0, 5.9 Hz, 1 H), 2.66 – 2.47 (m, 2 H), 2.45 – 2.33 (m, 2 H), 1.98 – 1.84 (m, 2 H), 1.83 – 1.74 (m, 2 H), 1.60 (t, *J* = 1.5 Hz, 3 H), 1.19 (t, *J* = 7.1 Hz, 3 H). <sup>13</sup>C{<sup>1</sup>H} NMR (100 MHz, CDCl<sub>3</sub>) δ 205.1, 184.0, 170.6, 136.3, 128.32, 128.27, 126.8, 115.6, 80.8, 68.9, 68.8, 60.9, 33.2, 26.4, 25.5, 24.8, 13.8, 5.8. HRMS (ESI) *m/z*: [M + Na]<sup>+</sup> Calcd for C<sub>20</sub>H<sub>26</sub>NaO<sub>5</sub> 369.1672, found 369.1673.

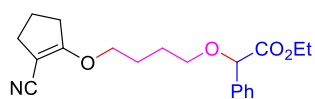

3pa

**Ethyl 2-(4-((2-cyanocyclopent-1-en-1-yl) voxy) butoxy)-2-phenylacetate (3pa**, new compound): The reaction was performed following the general procedure. The residue was purified by flash column chromatography (10:1 PE/EA) to give the product as a colorless oil (102 mg, 74%);  $^1\text{H}$  NMR (400 MHz,  $\text{CD}_3\text{OD}$ )  $\delta$  7.43 (dd,  $J = 7.8, 1.5$  Hz, 2 H), 7.38 – 7.32 (m, 3 H), 4.92 (s, 1 H), 4.27 – 4.24 (m, 2 H), 4.21 – 4.01 (m, 2 H), 3.62 – 3.57 (m, 1 H), 3.53 – 3.41 (m, 1 H), 2.67 – 2.41 (m, 4 H), 2.11 – 1.56 (m, 6 H), 1.18 (td,  $J = 7.1, 3.6$  Hz, 3 H).  $^{13}\text{C}\{^1\text{H}\}$  NMR (100 MHz,  $\text{CD}_3\text{OD\_SPE}$ )  $\delta$  174.8, 172.7, 138.2, 129.6, 129.5, 128.3, 118.4, 82.1, 80.2, 72.1, 70.2, 62.2, 33.1, 32.0, 27.4, 26.8, 21.4, 14.4. HRMS (ESI)  $m/z$ :  $[\text{M} + \text{Na}]^+$  Calcd for  $\text{C}_{20}\text{H}_{25}\text{NNaO}_4$  366.1676, found 366.1677.

### Typical Experimental Procedure B and Data of the Enol Ethers

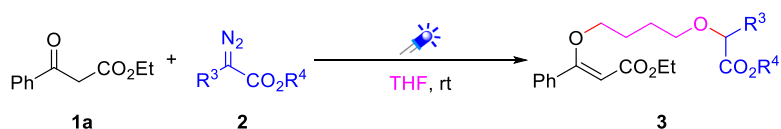

To a 10 mL Schlenk flask was added ethyl 3-oxo-3-phenylpropanoate **1a** (0.4 mmol, 77 mg) and THF (2 mL), followed by diazoacetates **2** (0.6 mmol). Then Schlenk tube was tightly screw capped. The mixture was stirred under the blue LEDs for 6 h. The solvents were evaporated in vacuo, and the residue was purified by flash column chromatography, eluting with petroleum ether and ethyl acetate (10:1) to afford the desired product **3**.

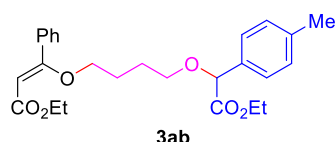

**Ethyl (Z)-3-(4-(2-ethoxy-2-oxo-1-(p-tolyl)ethoxy)butoxy)-3-phenylacrylate (3ab**, new compound): The reaction was performed following the general procedure. The residue was purified by flash column chromatography (10:1 PE/EA) to give the product as a colorless oil (141 mg, 80%);  $^1\text{H}$  NMR (400 MHz,  $\text{CDCl}_3$ )  $\delta$  7.73 – 7.46 (m, 2 H), 7.45 – 7.34 (m, 3 H), 7.31 (d,  $J = 8.0$  Hz, 2 H), 7.14 (d,  $J = 7.9$  Hz, 2 H), 5.52 (s, 1 H), 4.80 (s, 1 H), 4.34 – 4.08 (m, 4 H), 4.05 – 3.94 (m, 2 H), 3.59 – 3.54 (m, 1 H), 3.50 – 3.44 (m, 1 H), 2.33 (s, 3 H), 1.94 – 1.76 (m, 4 H), 1.29 (t,  $J = 7.1$  Hz, 3 H), 1.20 (t,  $J = 7.1$  Hz, 3 H).  $^{13}\text{C}\{^1\text{H}\}$  NMR (100 MHz,  $\text{CDCl}_3$ )  $\delta$  170.9, 167.7, 165.1, 138.1, 135.1, 133.7, 130.1, 129.1, 128.4, 127.3, 126.9, 100.5, 80.7, 72.5, 69.0,

60.9, 59.5, 26.7, 25.9, 21.0, 14.2, 14.0. HRMS (ESI)  $m/z$ :  $[M + Na]^+$  Calcd for  $C_{26}H_{32}NaO_6$  463.2091, found 463.2095.

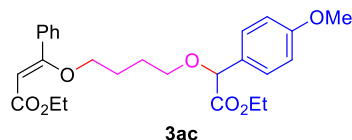

**Ethyl (Z)-3-(4-(2-ethoxy-1-(4-methoxyphenyl)-2-oxoethoxy)butoxy)-3-phenylacrylate**

**(3ac, new compound):** The reaction was performed following the general procedure. The residue was purified by flash column chromatography (10:1 PE/EA) to give the product as a colorless oil (137 mg, 75%);  $^1H$  NMR (400 MHz,  $d_6$ -DMSO)  $\delta$  7.59 (dd,  $J = 8.0, 1.5$  Hz, 2 H), 7.51 – 7.39 (m, 3 H), 7.30 – 7.28 (m, 2 H), 6.93 – 6.90 (m, 2 H), 5.60 (s, 1 H), 4.88 (s, 1 H), 4.12 – 4.02 (m, 4 H), 3.94 (t,  $J = 6.1$  Hz, 2 H), 3.74 (s, 3 H), 3.48 (dt,  $J = 8.9, 6.0$  Hz, 1 H), 3.39 (dt,  $J = 9.0, 6.0$  Hz, 1 H), 1.98 – 1.55 (m, 4 H), 1.21 (t,  $J = 7.1$  Hz, 3 H), 1.12 (t,  $J = 7.1$  Hz, 3 H).  $^{13}C\{^1H\}$  NMR (100 MHz,  $CD_3OD$ )  $\delta$  172.9, 169.6, 167.0, 161.3, 136.3, 131.5, 130.2, 129.7, 129.6, 128.5, 114.9, 101.1, 81.6, 73.7, 70.0, 62.1, 60.8, 55.7, 27.8, 27.0, 14.7, 14.4. HRMS (ESI)  $m/z$ :  $[M + H]^+$  Calcd for  $C_{26}H_{33}O_7$  457.2221, found 457.2245.

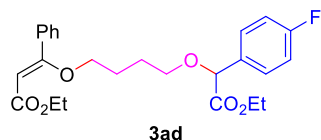

**Ethyl (Z)-3-(4-(2-ethoxy-1-(4-fluorophenyl)-2-oxoethoxy)butoxy)-3-phenylacrylate (3ad,**

**new compound):** The reaction was performed following the general procedure. The residue was purified by flash column chromatography (10:1 PE/EA) to give the product as a colorless oil (162 mg, 91%);  $^1H$  NMR (400 MHz,  $d_6$ -DMSO)  $\delta$  7.72 – 7.55 (m, 2 H), 7.51 – 7.37 (m, 5 H), 7.19 (t,  $J = 8.8$  Hz, 2 H), 5.60 (s, 1 H), 4.99 (s, 1 H), 4.19 – 4.01 (m, 4 H), 3.96 – 3.93 (m, 2 H), 3.52 (dt,  $J = 9.0, 6.0$  Hz, 1 H), 3.42 (dt,  $J = 9.0, 5.9$  Hz, 1 H), 1.86 – 1.61 (m, 4 H), 1.21 (t,  $J = 7.1$  Hz, 3 H), 1.12 (t,  $J = 7.1$  Hz, 3 H).  $^{19}F$  NMR (376 MHz,  $d_6$ -DMSO)  $\delta$  -113.65.  $^{13}C\{^1H\}$  NMR (100 MHz,  $d_6$ -DMSO)  $\delta$  170.4, 166.8, 164.3, 162.0 (d,  $J = 244.5$  Hz), 134.6, 133.2 (d,  $J = 3.0$  Hz), 130.4, 129.1 (d,  $J = 8.4$  Hz), 128.7, 127.1, 115.3 (d,  $J = 21.5$  Hz), 99.8, 79.2, 72.4, 68.7, 60.6, 59.1, 26.3, 25.5, 14.2, 13.9. HRMS (ESI)  $m/z$ :  $[M + Na]^+$  Calcd for  $C_{25}H_{29}FNaO_6$  467.1840,



found 467.1840.

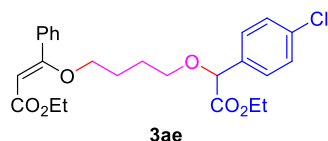

**Ethyl (Z)-3-(4-(1-(4-chlorophenyl)-2-ethoxy-2-oxoethoxy)butoxy)-3-phenylacrylate (3ae,**

new compound): The reaction was performed following the general procedure. The residue was purified by flash column chromatography (10:1 PE/EA) to give the product as a colorless oil (138 mg, 75%);  $^1\text{H}$  NMR (400 MHz,  $\text{CDCl}_3$ )  $\delta$  7.58 – 7.47 (m, 2 H), 7.46 – 7.33 (m, 5 H), 7.33 – 7.27 (m, 2 H), 5.52 (s, 1 H), 4.81 (s, 1 H), 4.35 – 4.08 (m, 4 H), 4.08 – 3.93 (m, 2 H), 3.59 (dt,  $J = 9.0, 5.9$  Hz, 1 H), 3.53 – 3.37 (m, 1 H), 1.98 – 1.73 (m, 4 H), 1.29 (t,  $J = 7.1$  Hz, 3 H), 1.19 (t,  $J = 7.1$  Hz, 3 H).  $^{13}\text{C}\{^1\text{H}\}$  NMR (100 MHz,  $d_6$ -DMSO)  $\delta$  170.2, 166.8, 164.3, 135.9, 134.6, 133.0, 130.5, 128.8, 128.7, 128.5, 127.1, 99.8, 79.1, 72.4, 68.8, 60.8, 59.2, 26.3, 25.5, 14.2, 13.9. HRMS (ESI)  $m/z$ :  $[\text{M} + \text{Na}]^+$  Calcd for  $\text{C}_{25}\text{H}_{29}\text{ClNaO}_6$  483.1545, found 483.1561.

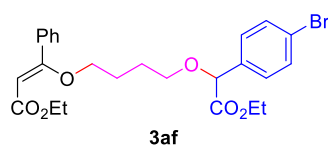

**Ethyl (Z)-3-(4-(1-(4-bromophenyl)-2-ethoxy-2-oxoethoxy)butoxy)-3-phenylacrylate (3af,**

new compound): The reaction was performed following the general procedure. The residue was purified by flash column chromatography (10:1 PE/EA) to give the product as a colorless oil (187 mg, 93%);  $^1\text{H}$  NMR (400 MHz,  $d_6$ -DMSO)  $\delta$  7.69 – 7.54 (m, 4 H), 7.51 – 7.40 (m, 3 H), 7.38 – 7.28 (m, 2 H), 5.60 (s, 1 H), 4.99 (s, 1 H), 4.18 – 4.02 (m, 4 H), 3.96 – 3.93 (m, 2 H), 3.53 (dt,  $J = 9.0, 6.0$  Hz, 1 H), 3.43 (dt,  $J = 9.0, 5.9$  Hz, 1 H), 1.85 – 1.51 (m, 4 H), 1.21 (t,  $J = 7.1$  Hz, 3 H), 1.11 (t,  $J = 7.1$  Hz, 3 H).  $^{13}\text{C}\{^1\text{H}\}$  NMR (100 MHz,  $d_6$ -DMSO)  $\delta$  170.1, 166.8, 164.3, 136.3, 134.6, 131.4, 130.4, 129.1, 128.7, 127.1, 121.6, 99.8, 79.2, 72.4, 68.8, 60.7, 59.1, 26.3, 25.5, 14.2, 13.9. HRMS (ESI)  $m/z$ :  $[\text{M} + \text{Na}]^+$  Calcd for  $\text{C}_{25}\text{H}_{29}\text{BrNaO}_6$  527.1040, found 527.0778.

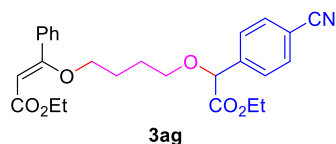

**Ethyl (Z)-3-(4-(1-(4-cyanophenyl)-2-ethoxy-2-oxoethoxy)butoxy)-3-phenylacrylate (3ag, new compound):** The reaction was performed following the general procedure. The residue was purified by flash column chromatography (10:1 PE/EA) to give the product as a colorless oil (130 mg, 72%);  $^1\text{H}$  NMR (400 MHz,  $\text{CDCl}_3$ )  $\delta$  7.74 – 7.61 (m, 2 H), 7.56 (d,  $J = 8.3$  Hz, 2 H), 7.54 – 7.49 (m, 2 H), 7.45 – 7.33 (m, 3 H), 5.53 (s, 1 H), 4.89 (s, 1 H), 4.26 – 4.09 (m, 4 H), 4.08 – 3.93 (m, 2 H), 3.65 (dt,  $J = 8.9, 5.8$  Hz, 1 H), 3.59 – 3.45 (m, 1 H), 1.93 – 1.77 (m, 4 H), 1.29 (t,  $J = 7.1$  Hz, 3 H), 1.21 (t,  $J = 7.1$  Hz, 3 H).  $^{13}\text{C}\{^1\text{H}\}$  NMR (100 MHz,  $d_6$ -DMSO)  $\delta$  169.8, 166.8, 164.3, 142.3, 134.6, 132.5, 130.5, 128.7, 127.8, 127.1, 118.5, 111.2, 99.8, 79.2, 72.4, 69.1, 61.0, 59.2, 26.3, 25.5, 14.2, 13.9. HRMS (ESI)  $m/z$ :  $[\text{M} + \text{Na}]^+$  Calcd for  $\text{C}_{26}\text{H}_{29}\text{NNaO}_6$  474.1887, found 474.1907.

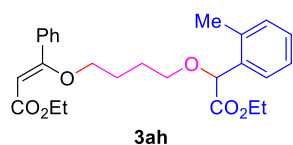

**Ethyl (Z)-3-(4-(2-ethoxy-2-oxo-1-(o-tolyl)ethoxy)butoxy)-3-phenylacrylate (3ah, new compound):** The reaction was performed following the general procedure. The residue was purified by flash column chromatography (10:1 PE/EA) to give the product as a colorless oil (121 mg, 69%);  $^1\text{H}$  NMR (400 MHz,  $\text{CD}_3\text{OD}$ )  $\delta$  7.64 – 7.47 (m, 2 H), 7.46 – 7.37 (m, 3 H), 7.32 (d,  $J = 7.4$  Hz, 1 H), 7.17 (t,  $J = 8.3$  Hz, 3 H), 5.50 (s, 1 H), 5.10 (s, 1 H), 4.24 – 4.03 (m, 4 H), 3.96 (s, 2 H), 3.60 – 3.56 (m, 1 H), 3.45 (t,  $J = 7.3$  Hz, 1 H), 2.38 (s, 3 H), 1.79 – 1.78 (m, 4 H), 1.33 – 1.22 (m, 3 H), 1.21 – 1.10 (m, 3 H).  $^{13}\text{C}\{^1\text{H}\}$  NMR (100 MHz,  $\text{CD}_3\text{OD}$ )  $\delta$  172.8, 169.6, 166.9, 137.7, 136.5, 136.3, 131.6, 131.4, 129.7, 129.4, 128.53, 128.45, 127.1, 101.0, 79.4, 73.7, 70.3, 62.1, 60.7, 27.8, 27.1, 19.6, 14.7, 14.4. HRMS (ESI)  $m/z$ :  $[\text{M} + \text{Na}]^+$  Calcd for  $\text{C}_{26}\text{H}_{32}\text{NaO}_6$  463.2091, found 463.2093.

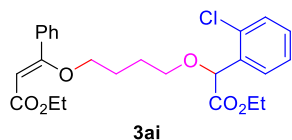

**Ethyl (Z)-3-(4-(1-(2-chlorophenyl)-2-ethoxy-2-oxoethoxy)butoxy)-3-phenylacrylate (3ai, new compound):** The reaction was performed following the general procedure. The residue was purified by flash column chromatography (10:1 PE/EA) to give the product as a colorless oil (155 mg, 84%);  $^1\text{H NMR}$  (400 MHz,  $\text{CDCl}_3$ )  $\delta$  7.59 – 7.30 (m, 3 H), 7.29 – 7.14 (m, 4 H), 7.17 – 7.03 (m, 2 H), 5.37 (s, 1 H), 5.16 (s, 1 H), 4.32 – 3.93 (m, 4 H), 3.92 – 3.77 (m, 2 H), 3.53 – 3.48 (m, 1 H), 3.39 – 3.34 (m, 1 H), 1.73 – 1.64 (m, 4 H), 1.14 (t,  $J = 7.1$  Hz, 3 H), 1.06 (t,  $J = 7.1$  Hz, 3 H).  $^{13}\text{C}\{^1\text{H}\}$  NMR (100 MHz,  $\text{CDCl}_3$ )  $\delta$  170.1, 167.6, 165.1, 135.1, 134.7, 133.5, 130.1, 129.5, 129.4, 128.5, 128.4, 127.2, 127.0, 100.5, 77.2, 72.4, 69.7, 61.1, 59.5, 26.6, 25.9, 14.2, 13.9. HRMS (ESI)  $m/z$ :  $[\text{M} + \text{Na}]^+$  Calcd for  $\text{C}_{25}\text{H}_{29}\text{ClNaO}_6$  483.1545, found 483.1545.

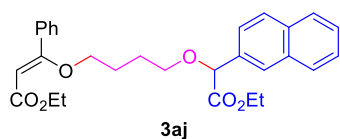

**Ethyl (Z)-3-(4-(2-ethoxy-1-(naphthalen-2-yl)-2-oxoethoxy)butoxy)-3-phenylacrylate (3aj, new compound):** The reaction was performed following the general procedure. The residue was purified by flash column chromatography (10:1 PE/EA) to give the product as a colorless oil (175 mg, 92%);  $^1\text{H NMR}$  (400 MHz,  $d_6$ -DMSO)  $\delta$  8.28 – 8.20 (m, 1 H), 7.99 – 7.88 (m, 2 H), 7.62 – 7.37 (m, 9 H), 5.61 (s, 1 H), 5.58 (s, 1 H), 4.20 – 4.00 (m, 4 H), 3.93 – 3.90 (m, 2 H), 3.64 (dt,  $J = 9.0, 5.8$  Hz, 1 H), 3.52 – 3.49 (m, 1 H), 1.72 – 1.67 (m, 4 H), 1.19 (t,  $J = 7.1$  Hz, 3 H), 1.06 (t,  $J = 7.1$  Hz, 3 H).  $^{13}\text{C}\{^1\text{H}\}$  NMR (100 MHz,  $\text{CD}_3\text{OD}$ )  $\delta$  172.8, 169.6, 166.9, 136.2, 135.3, 134.1, 132.3, 131.4, 130.3, 129.6, 128.4, 127.8, 127.3, 126.9, 126.2, 125.3, 101.0, 80.7, 73.6, 70.4, 62.2, 60.7, 27.8, 27.0, 14.74, 14.72, 14.4. HRMS (ESI)  $m/z$ :  $[\text{M} + \text{H}]^+$  Calcd for  $\text{C}_{29}\text{H}_{33}\text{O}_6$  477.2272, found 477.2258.

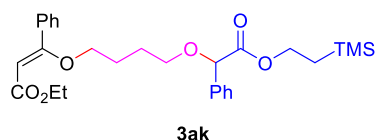

**Ethyl (Z)-3-(4-(2-oxo-1-phenyl-2-(2-(trimethylsilyl)ethoxy)butoxy)-3-phenylacrylate (3ak, new compound):** The reaction was performed following the general procedure. The residue was purified by flash column chromatography (10:1 PE/EA) to give the product as a colorless oil (189 mg, 95%);  $^1\text{H}$  NMR (400 MHz,  $\text{CD}_3\text{OD}$ )  $\delta$  7.50 (d,  $J = 7.0$  Hz, 2 H), 7.46 – 7.16 (m, 8 H), 5.50 (s, 1 H), 4.86 (s, 1 H), 4.20 – 4.12 (m, 4 H), 3.97 – 3.96 (m, 2 H), 3.59 – 3.55 (m, 1 H), 3.53 – 3.35 (m, 1 H), 1.79 (d,  $J = 2.6$  Hz, 4 H), 1.26 (t,  $J = 7.0$  Hz, 3 H), 0.90 (t,  $J = 8.0$  Hz, 2 H), -0.03 (d,  $J = 7.0$  Hz, 9 H).  $^{13}\text{C}\{^1\text{H}\}$  NMR (100 MHz,  $\text{CD}_3\text{OD}$ )  $\delta$  172.7, 169.6, 166.9, 138.2, 136.3, 131.4, 129.7, 129.6, 129.5, 128.5, 128.3, 101.2, 82.2, 73.7, 70.3, 64.4, 60.7, 27.8, 27.0, 18.0, 14.8, -1.4. HRMS (ESI)  $m/z$ :  $[\text{M} + \text{Na}]^+$  Calcd for  $\text{C}_{28}\text{H}_{38}\text{NaO}_6\text{Si}$  521.2330, found 521.2361.

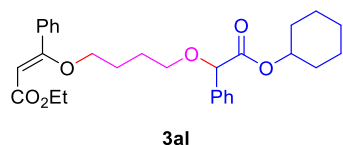

**Ethyl (Z)-3-(4-(2-(cyclohexyloxy)-2-oxo-1-phenylethoxy)butoxy)-3-phenylacrylate (3al, new compound):** The reaction was performed following the general procedure. The residue was purified by flash column chromatography (10:1 PE/EA) to give the product as a colorless oil (161 mg, 84%);  $^1\text{H}$  NMR (400 MHz,  $d_6$ -DMSO)  $\delta$  7.75 – 7.53 (m, 2 H), 7.53 – 7.41 (m, 3 H), 7.40 – 7.24 (m, 5 H), 5.60 (s, 1 H), 4.93 (s, 1 H), 4.70 (dt,  $J = 8.1, 4.2$  Hz, 1 H), 4.09 (q,  $J = 7.1$  Hz, 2 H), 3.98 – 3.95 (m, 2 H), 3.53 (dt,  $J = 8.9, 6.1$  Hz, 1 H), 3.45 (dt,  $J = 9.0, 5.9$  Hz, 1 H), 1.94 – 1.66 (m, 5 H), 1.59 (s, 2 H), 1.55 – 1.14 (m, 10 H).  $^{13}\text{C}\{^1\text{H}\}$  NMR (100 MHz,  $d_6$ -DMSO)  $\delta$  169.9, 166.8, 164.3, 137.1, 134.7, 130.4, 128.6, 128.3, 127.0, 126.9, 99.7, 80.2, 72.4, 68.7, 59.1, 30.8, 30.6, 26.4, 25.6, 24.7, 22.8, 22.7, 14.2. HRMS (ESI)  $m/z$ :  $[\text{M} + \text{Na}]^+$  Calcd for  $\text{C}_{29}\text{H}_{36}\text{NaO}_6$  503.2404, found 503.2401.

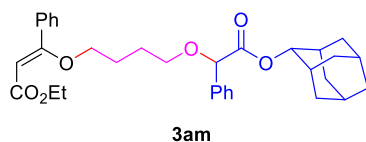

**Ethyl (Z)-3-(4-(2-(((1R,3S,5r,7r)-adamantan-2-yl)oxy)-2-oxo-1-phenylethoxy)butoxy)-3-phenylacrylate (3am, new compound):** The reaction was performed following the general procedure. The residue was purified by flash column chromatography (10:1 PE/EA) to give the product as a colorless oil (134 mg, 63%);  $^1\text{H}$  NMR (400 MHz,  $\text{CD}_3\text{OD}$ )  $\delta$  7.55 – 7.49 (m, 2 H), 7.47 – 7.36 (m, 5 H), 7.37 – 7.27 (m, 3 H), 5.50 (s, 1 H), 4.94 (s, 1 H), 4.89 (s, 1 H), 4.15 (q,  $J = 7.1$  Hz, 2 H), 4.06 – 3.89 (m, 2 H), 3.63 – 3.58 (m, 1 H), 3.51 – 3.46 (m, 1 H), 1.96 – 1.93 (m, 2 H), 1.89 – 1.74 (m, 9 H), 1.69 (s, 4 H), 1.60 – 1.51 (m, 2 H), 1.42 – 1.31 (m, 1 H), 1.30 – 1.20 (m, 3 H).  $^{13}\text{C}\{^1\text{H}\}$  NMR (100 MHz,  $d_6$ -DMSO)  $\delta$  169.7, 166.7, 164.2, 137.3, 134.6, 130.4, 128.6, 128.3, 128.2, 127.0, 126.8, 99.7, 80.2, 76.8, 72.4, 68.7, 59.1, 36.6, 35.5, 35.4, 31.2, 31.03, 31.00, 30.8, 26.5, 26.4, 26.3, 25.6, 14.1. HRMS (ESI)  $m/z$ :  $[\text{M} + \text{Na}]^+$  Calcd for  $\text{C}_{33}\text{H}_{40}\text{NaO}_6$  555.2717, found 555.2742.

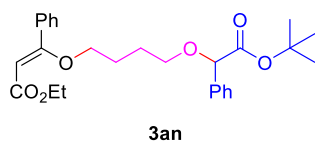

**Ethyl (Z)-3-(4-(2-(tert-butoxy)-2-oxo-1-phenylethoxy)butoxy)-3-phenylacrylate (3an, new compound):** The reaction was performed following the general procedure. The residue was purified by flash column chromatography (10:1 PE/EA) to give the product as a colorless oil (120 mg, 66%);  $^1\text{H}$  NMR (400 MHz,  $d_6$ -DMSO)  $\delta$  7.60 (dd,  $J = 8.0, 1.5$  Hz, 2 H), 7.55 – 7.40 (m, 3 H), 7.40 – 7.23 (m, 5 H), 5.60 (s, 1 H), 4.80 (s, 1 H), 4.09 (q,  $J = 7.1$  Hz, 2 H), 3.98 – 3.94 (m, 2 H), 3.52 (dt,  $J = 8.8, 6.1$  Hz, 1 H), 3.43 (dt,  $J = 8.9, 5.8$  Hz, 1 H), 1.95 – 1.56 (m, 4 H), 1.33 (s, 9 H), 1.21 (t,  $J = 7.1$  Hz, 3 H).  $^{13}\text{C}\{^1\text{H}\}$  NMR (100 MHz,  $d_6$ -DMSO)  $\delta$  169.8, 166.8, 164.3, 137.2, 134.6, 130.5, 128.7, 128.3, 128.2, 127.1, 126.8, 99.8, 81.0, 80.9, 72.4, 68.6, 59.2, 27.5, 26.4, 25.6, 14.2. HRMS (ESI)  $m/z$ :  $[\text{M} + \text{Na}]^+$  Calcd for  $\text{C}_{27}\text{H}_{34}\text{NaO}_6$  477.2248, found 477.2239.

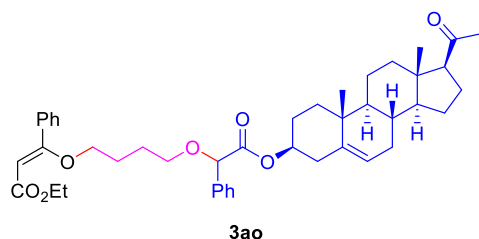

**Ethyl (Z)-3-(4-(2-(((3S,8S,9S,10R,13S,14S,17S)-17-acetyl-10,13-dimethyl-2,3,4,7,8,9,10,11,12,13,14,15,16,17-tetradecahydro-1H-cyclopenta[a]phenanthren-3-yl)oxy)-2-oxo-1-phenylethoxy)butoxy)-3-phenylacrylate (3ao, new compound):** The

reaction was performed following the general procedure. The residue was purified by flash column chromatography (10:1 PE/EA) to give the product as a colorless oil (195 mg, 70%); <sup>1</sup>H NMR (400 MHz, *d*<sub>6</sub>-DMSO) δ 7.59 (d, *J* = 7.1 Hz, 2 H), 7.52 – 7.17 (m, 8 H), 5.60 (s, 1 H), 5.32 – 5.27 (m, 1 H), 4.93 (s, 1 H), 4.52 – 4.51 (m, 1 H), 4.16 – 3.83 (m, 4 H), 3.61 – 3.40 (m, 2 H), 2.25 (d, *J* = 7.4 Hz, 1 H), 2.13 – 2.11 (m, 1 H), 2.09 – 1.84 (m, 7 H), 1.83 – 1.64 (m, 5 H), 1.65 – 1.45 (m, 5 H), 1.37 (s, 4 H), 1.22 – 1.15 (m, 3 H), 1.11 – 1.02 (m, 3 H), 0.91 (s, 4 H), 0.51 (s, 3 H). <sup>13</sup>C{<sup>1</sup>H} NMR (100 MHz, *d*<sub>6</sub>-DMSO) δ 208.4, 170.0, 166.8, 164.3, 139.2, 139.1, 136.9, 134.7, 130.4, 128.7, 128.4, 127.1, 126.9, 122.2, 99.7, 80.1, 73.9, 72.5, 68.8, 62.5, 59.2, 56.0, 49.2, 43.2, 37.9, 37.5, 37.3, 36.4, 36.0, 31.2, 31.1, 27.2, 26.4, 25.6, 24.0, 22.2, 20.5, 18.9, 14.2, 12.8. HRMS (ESI) *m/z*: [M + H]<sup>+</sup> Calcd for C<sub>44</sub>H<sub>57</sub>O<sub>7</sub> 697.4099, found 697.4117.

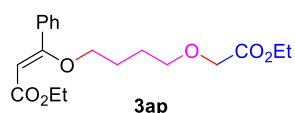

**Ethyl (Z)-3-(4-(2-ethoxy-2-oxoethoxy)butoxy)-3-phenylacrylate (3ap, new compound):** The reaction was performed following the general procedure. The residue was purified by flash column chromatography (10:1 PE/EA) to give the product as a colorless oil (52 mg, 37%); <sup>1</sup>H NMR (300 MHz, CDCl<sub>3</sub>) δ 7.53 (dd, *J* = 7.5, 2.0 Hz, 2 H), 7.42 – 7.36 (m, 3 H), 5.53 (s, 1 H), 4.24 – 4.16 (m, 4 H), 4.10 – 3.81 (m, 4 H), 3.59 – 3.55 (m, 2 H), 1.96 – 1.68 (m, 4 H), 1.29 (q, *J* = 7.3 Hz, 6 H). <sup>13</sup>C{<sup>1</sup>H} NMR (75 MHz, CDCl<sub>3</sub>) δ 170.5, 167.8, 165.3, 135.2, 130.2, 128.5, 127.4, 100.7, 72.5, 71.3, 68.3, 60.8, 59.7, 26.7, 26.0, 14.4, 14.2. HRMS (ESI) *m/z*: [M + Na]<sup>+</sup> Calcd for C<sub>19</sub>H<sub>26</sub>NaO<sub>6</sub> 373.1622, found 373.1620.

## Typical Experimental Procedure C and Data of the Vinyl Ethers

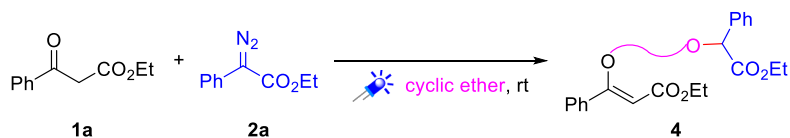

To a 10 mL Schlenk flask was added ethyl 3-oxo-3-phenylpropanoate **1a** (0.4 mmol, 77 mg) and cyclic ether (2 mL), followed by ethyl 2-diazo-2-phenylacetate **2a** (0.6 mmol, 114 mg). Then Schlenk tube was tightly screw capped. The mixture was stirred under the blue LEDs for 6 h. The solvents were evaporated in vacuo, and the residue was purified by flash column chromatography, eluting with petroleum ether and ethyl acetate (10:1) to afford the desired product **4**.

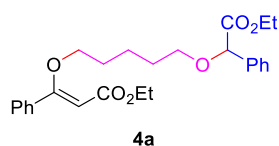

**Ethyl (Z)-3-((5-(2-ethoxy-2-oxo-1-phenylethoxy)pentyl)oxy)-3-phenylacrylate (4a**, new compound): The reaction was performed following the general procedure. The residue was purified by flash column chromatography (10:1 PE/EA) to give the product as a colorless oil (157 mg, 89%);  $^1\text{H NMR}$  (400 MHz,  $\text{CD}_3\text{OD}$ )  $\delta$  7.53 (dd,  $J = 7.8, 1.6$  Hz, 2 H), 7.48 – 7.37 (m, 5 H), 7.36 – 7.23 (m, 3 H), 5.51 (s, 1 H), 4.89 (s, 1 H), 4.24 – 4.03 (m, 4 H), 3.96 – 3.93 (m, 2 H), 3.54 (dt,  $J = 9.1, 6.3$  Hz, 1 H), 3.42 (dt,  $J = 9.1, 6.3$  Hz, 1 H), 1.75 – 1.60 (m, 4 H), 1.55 – 1.47 (m, 2 H), 1.27 (t,  $J = 7.1$  Hz, 3 H), 1.16 (t,  $J = 7.1$  Hz, 3 H).  $^{13}\text{C}\{^1\text{H}\}$  NMR (100 MHz,  $\text{CD}_3\text{OD}$ )  $\delta$  172.7, 169.6, 167.0, 138.3, 136.4, 131.4, 129.7, 129.6, 129.5, 128.5, 128.3, 101.0, 82.1, 73.9, 70.6, 62.1, 60.8, 30.7, 30.2, 23.5, 14.8, 14.4. HRMS (ESI)  $m/z$ :  $[\text{M} + \text{Na}]^+$  Calcd for  $\text{C}_{26}\text{H}_{32}\text{NaO}_6$  463.2091, found 463.2105.

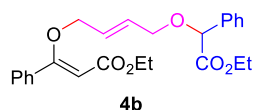

**Ethyl (Z)-3-(((E)-4-(2-ethoxy-2-oxo-1-phenylethoxy)but-2-en-1-yl)oxy)-3-phenylacrylate (4b**, new compound): The reaction was performed following the general procedure. The residue was purified by flash column chromatography (10:1 PE/EA) to give the product as a colorless oil (114 mg, 67%);  $^1\text{H NMR}$  (400 MHz,  $\text{CD}_3\text{OD}$ )  $\delta$  7.51 (dd,  $J = 8.1, 1.4$  Hz, 2 H), 7.48 – 7.16

(m, 8 H), 5.87 (dt,  $J = 7.3, 6.5$  Hz, 1 H), 5.78 – 5.72 (m, 1 H), 5.58 (s, 1 H), 4.83 (s, 1 H), 4.68 – 4.46 (m, 2 H), 4.29 – 4.03 (m, 4 H), 3.98 – 3.86 (m, 2 H), 1.47 – 1.21 (m, 3 H), 1.20 – 1.02 (m, 3 H).  $^{13}\text{C}\{^1\text{H}\}$  NMR (100 MHz,  $\text{CD}_3\text{OD}$ )  $\delta$  172.4, 169.1, 166.9, 137.8, 136.0, 131.6, 130.4, 129.8, 129.7, 129.63, 129.60, 128.6, 128.4, 102.0, 81.3, 69.3, 65.9, 62.3, 60.9, 14.7, 14.4. HRMS (ESI)  $m/z$ :  $[\text{M} + \text{Na}]^+$  Calcd for  $\text{C}_{25}\text{H}_{28}\text{NaO}_6$  447.1778, found 447.1779.

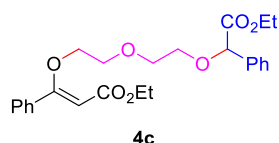

**Ethyl (Z)-3-(2-(2-(2-ethoxy-2-oxo-1-phenylethoxy)ethoxy)ethoxy)ethoxy-3-phenylacrylate (4c,** new compound): The reaction was performed following the general procedure. The residue was purified by flash column chromatography (10:1 PE/EA) to give the product as a colorless oil (53 mg, 30%);  $^1\text{H}$  NMR (400 MHz,  $d_6$ -DMSO)  $\delta$  7.69 (d,  $J = 7.5$  Hz, 2 H), 7.47 – 7.34 (m, 8 H), 5.69 (s, 1 H), 5.05 (s, 1 H), 4.13 – 4.03 (m, 6 H), 3.89 – 3.48 (m, 6 H), 1.22 (t,  $J = 7.1$  Hz, 3 H), 1.10 (t,  $J = 7.1$  Hz, 3 H).  $^{13}\text{C}\{^1\text{H}\}$  NMR (100 MHz,  $d_6$ -DMSO)  $\delta$  170.4, 166.9, 164.4, 136.8, 134.8, 130.5, 128.5, 128.4 (2C, overlap), 127.3, 127.1, 98.9, 80.2, 72.7, 69.7, 69.6, 68.5, 60.6, 59.2, 14.2, 13.9. HRMS (ESI)  $m/z$ :  $[\text{M} + \text{Na}]^+$  Calcd for  $\text{C}_{25}\text{H}_{30}\text{NaO}_7$  465.1884, found 465.1891.



Copies of  $^1\text{H}$  and  $^{13}\text{C}\{^1\text{H}\}$  NMR Spectra of All the Products, NOESY Spectra of Products

3aa, 3ba, 3ca, 3ea, 3fa, 3ga, 3ha, 3ia, 3ja, 3ka and 3ab

$^1\text{H}$  NMR (400 MHz,  $\text{CDCl}_3$ ) Spectrum of 3aa.

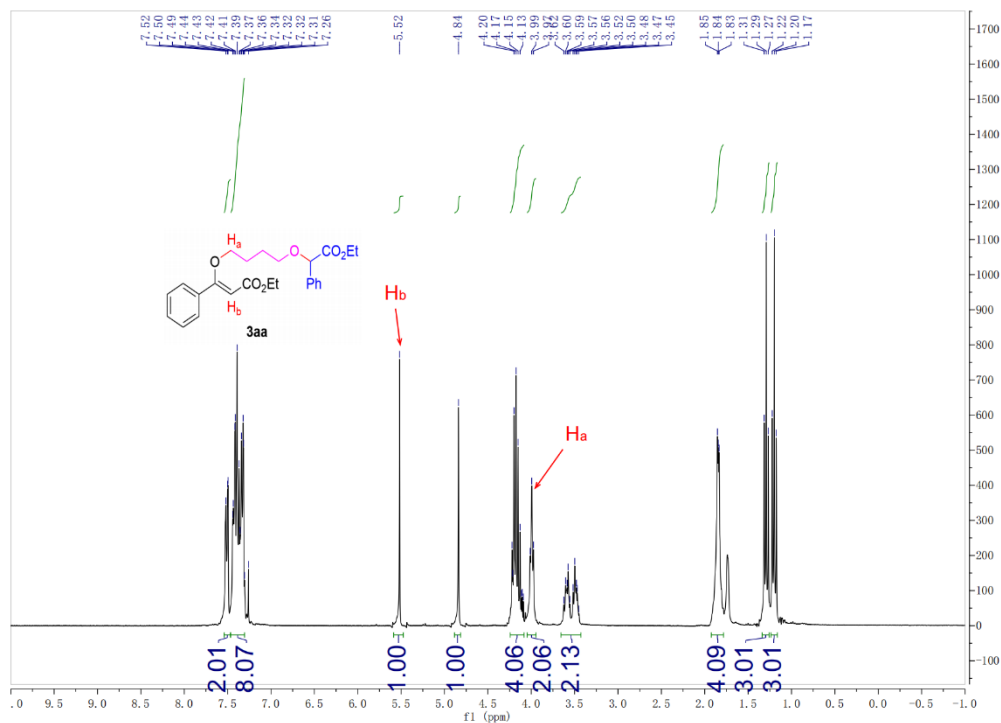

NOESY NMR (400 MHz,  $\text{CDCl}_3$ ) Spectrum of 3aa. Based on no NOE effect in  $\text{H}_a$  and  $\text{H}_b$ , the stereochemistry is Z.

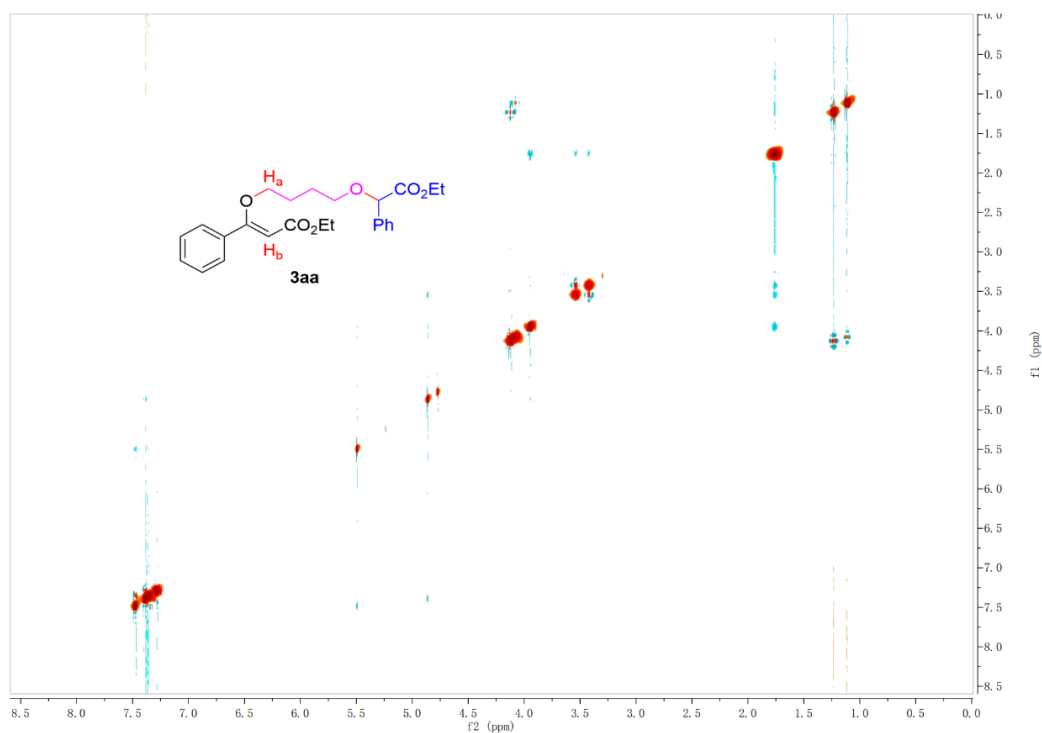

$^{13}\text{C}\{^1\text{H}\}$  NMR (75 MHz,  $d_6$ -DMSO) Spectrum of 3aa

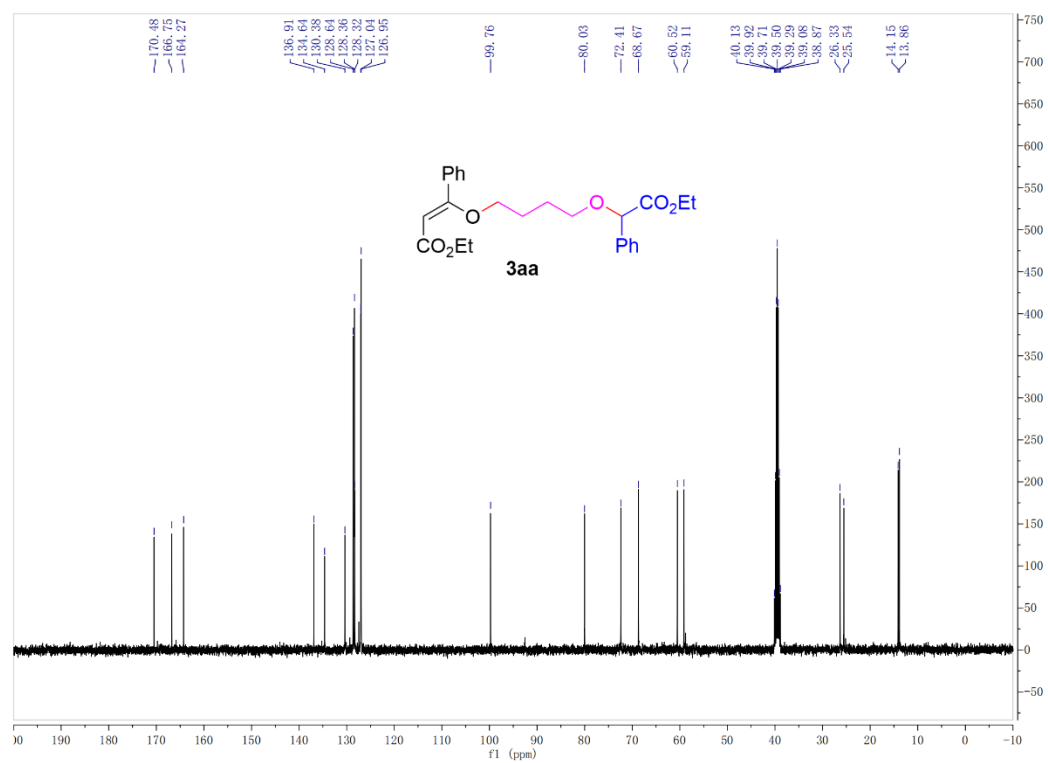

### <sup>1</sup>H NMR (400 MHz, CDCl<sub>3</sub>) Spectrum of 3ba

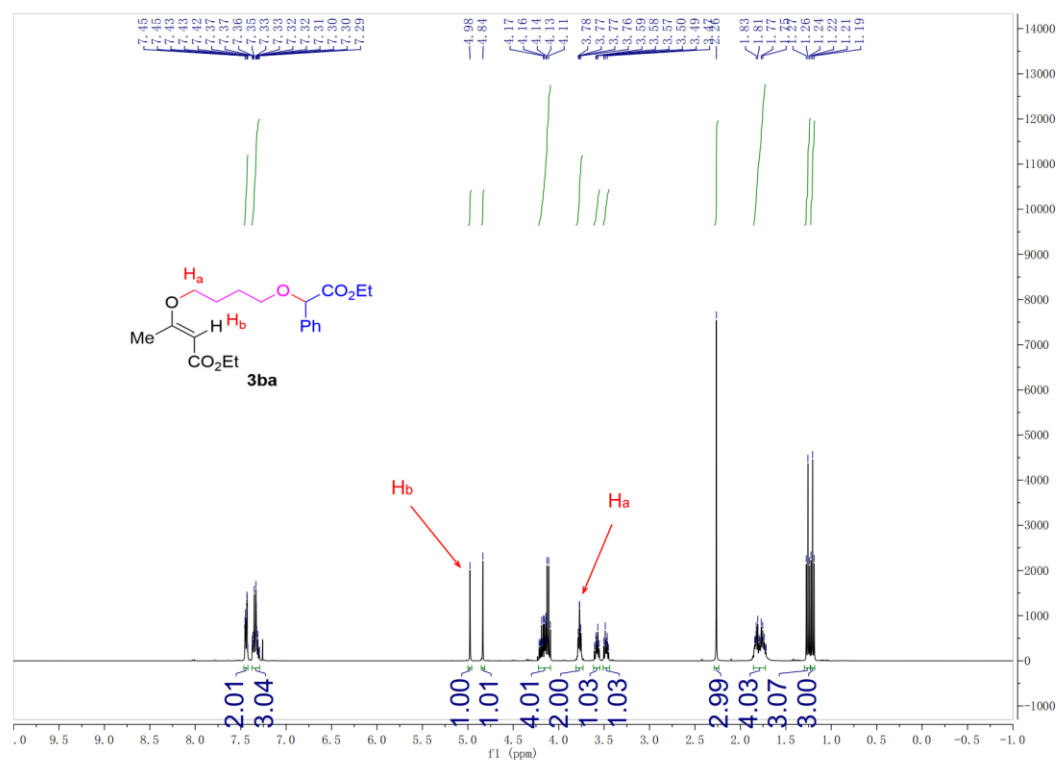

NOESY NMR (400 MHz, CDCl<sub>3</sub>) Spectrum of 3ba. Based on the obvious NOE effect in H<sub>a</sub> and H<sub>b</sub>, the stereochemistry is *E*.

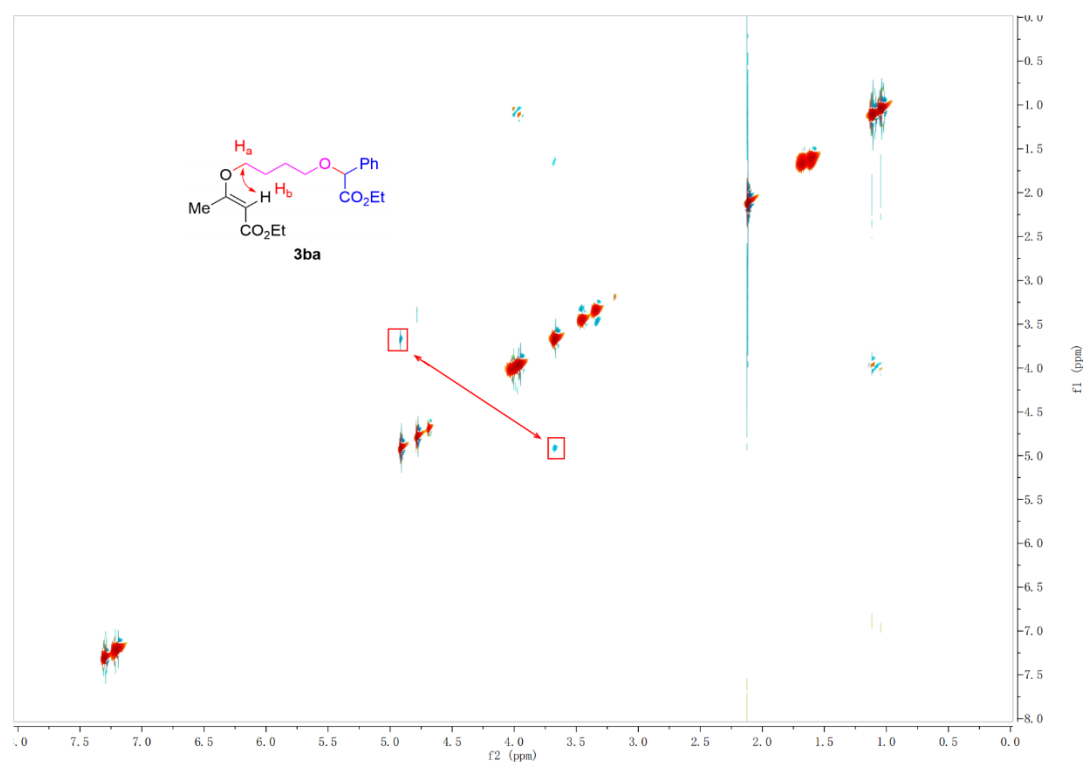

<sup>13</sup>C{<sup>1</sup>H} NMR (100 MHz, CDCl<sub>3</sub>) Spectrum of 3ba

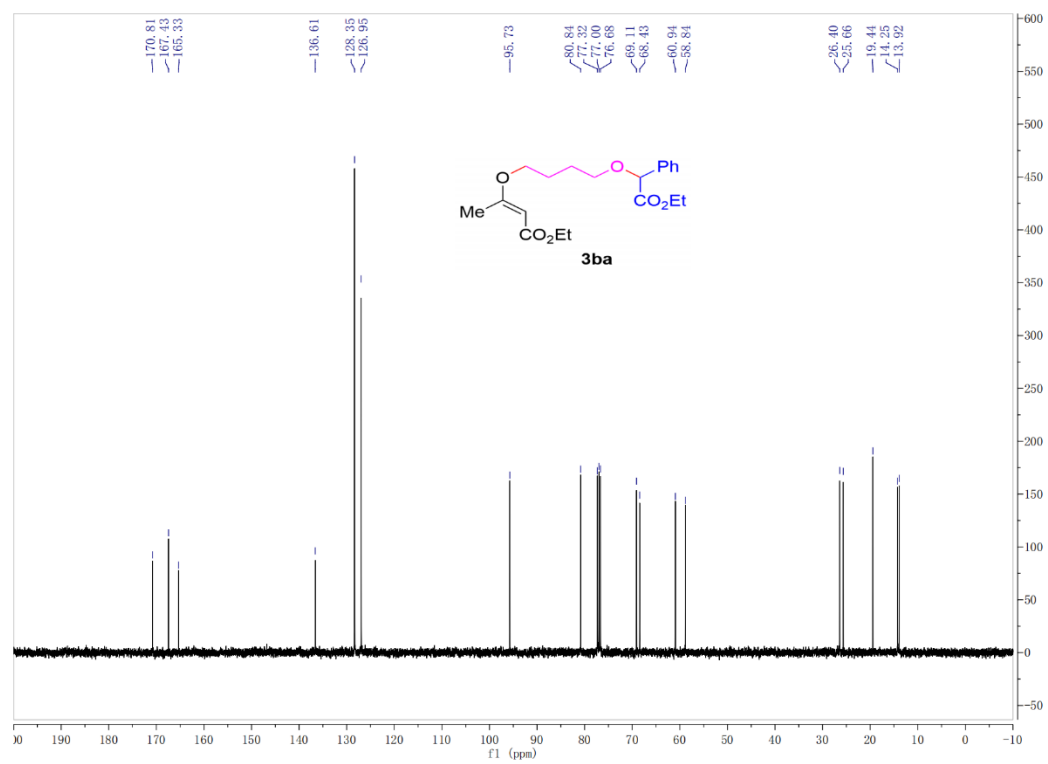

**<sup>1</sup>H NMR (400 MHz, CDCl<sub>3</sub>) Spectrum of 3ba'**

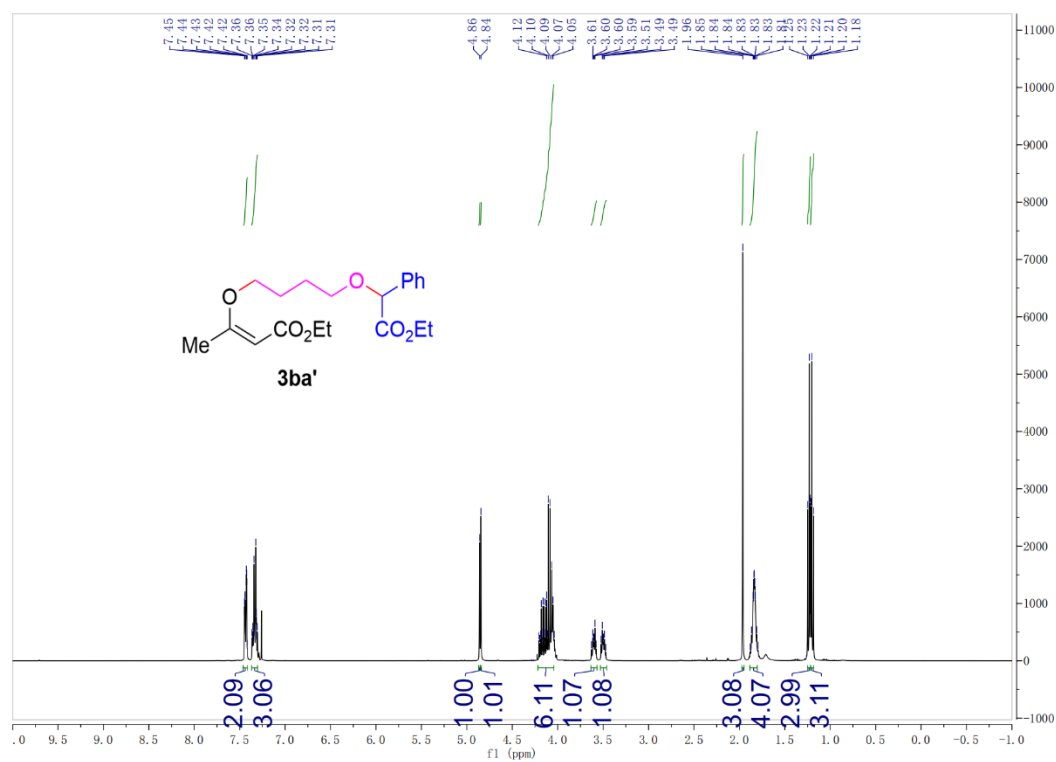

**<sup>13</sup>C{<sup>1</sup>H} NMR (100 MHz, CDCl<sub>3</sub>) Spectrum of 3ba'**

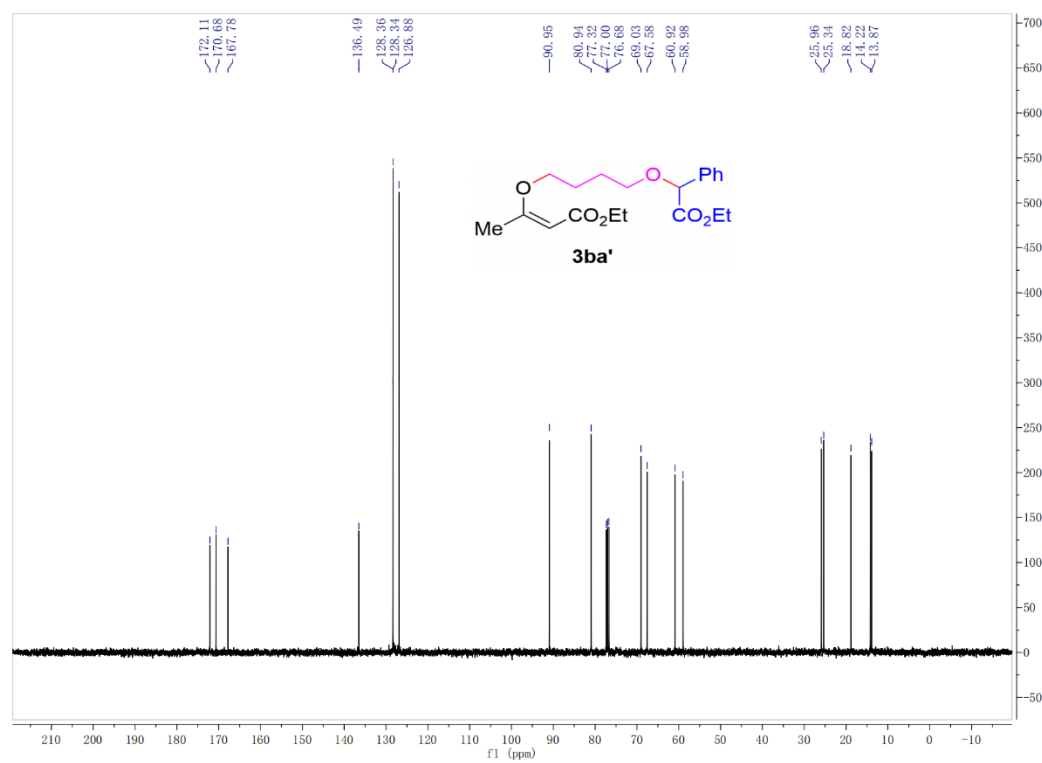

### <sup>1</sup>H NMR (400 MHz, CDCl<sub>3</sub>) Spectrum of 3ca

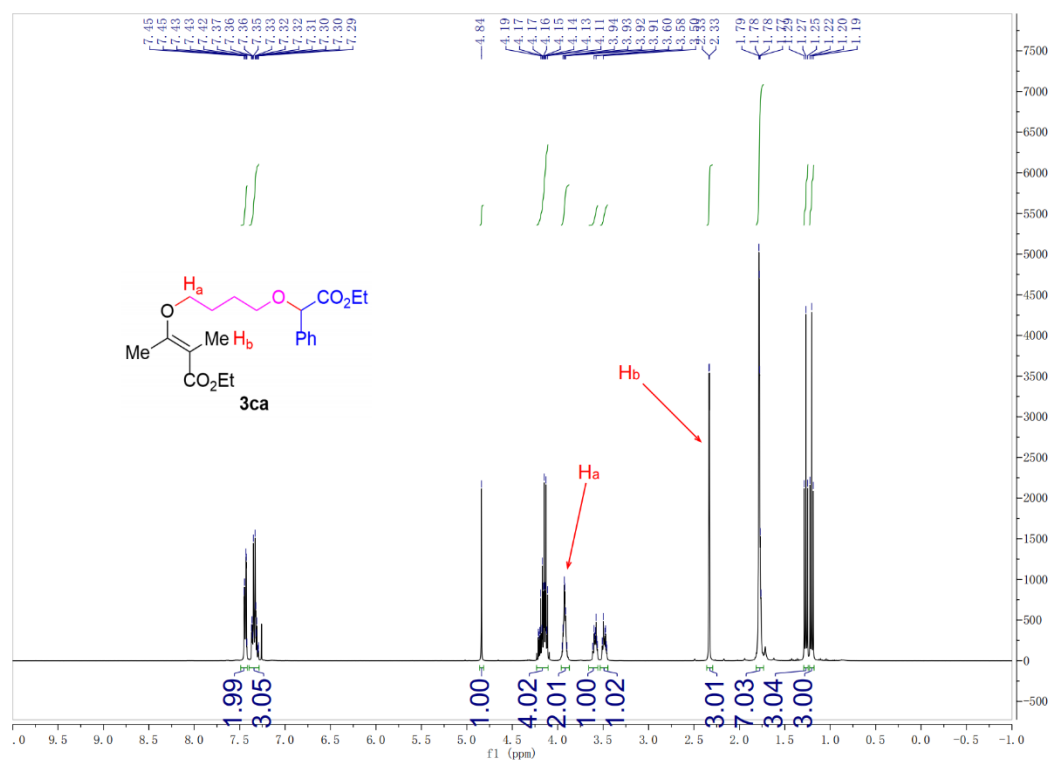

NOESY NMR (400 MHz, CDCl<sub>3</sub>) Spectrum of 3ca. Based on the obvious NOE effect in H<sub>a</sub> and H<sub>b</sub>, the stereochemistry is *E*.

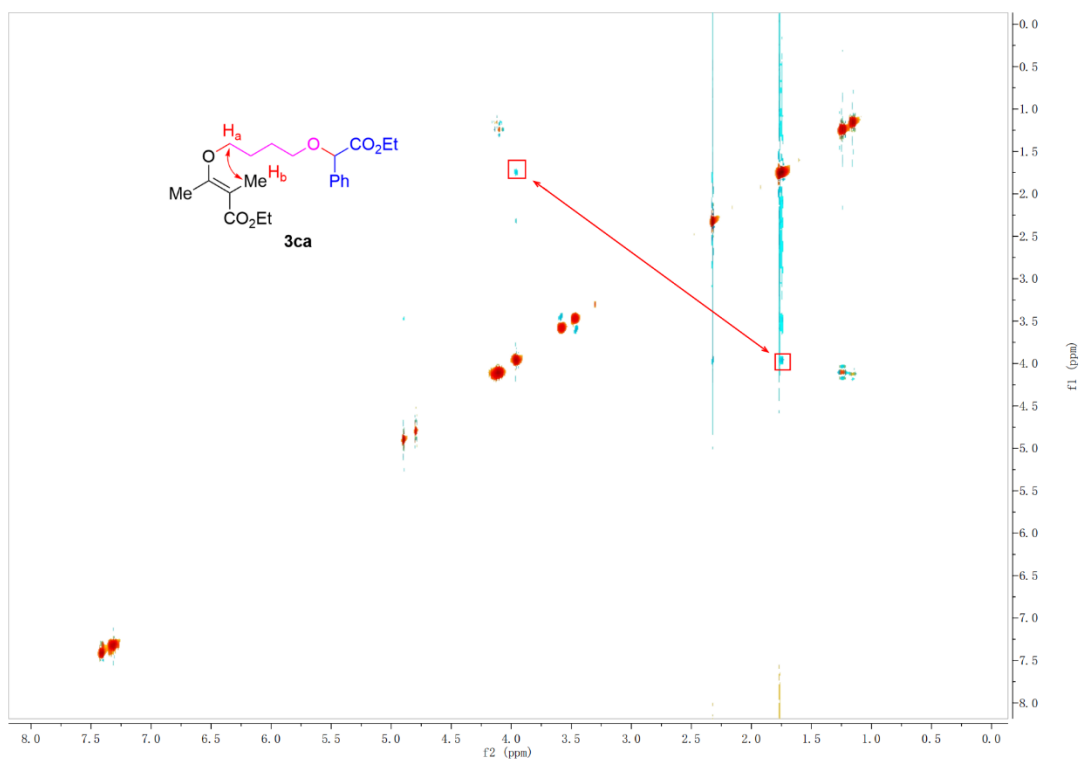

**$^{13}\text{C}\{^1\text{H}\}$  NMR (100 MHz,  $\text{CDCl}_3$ ) Spectrum of 3ca**

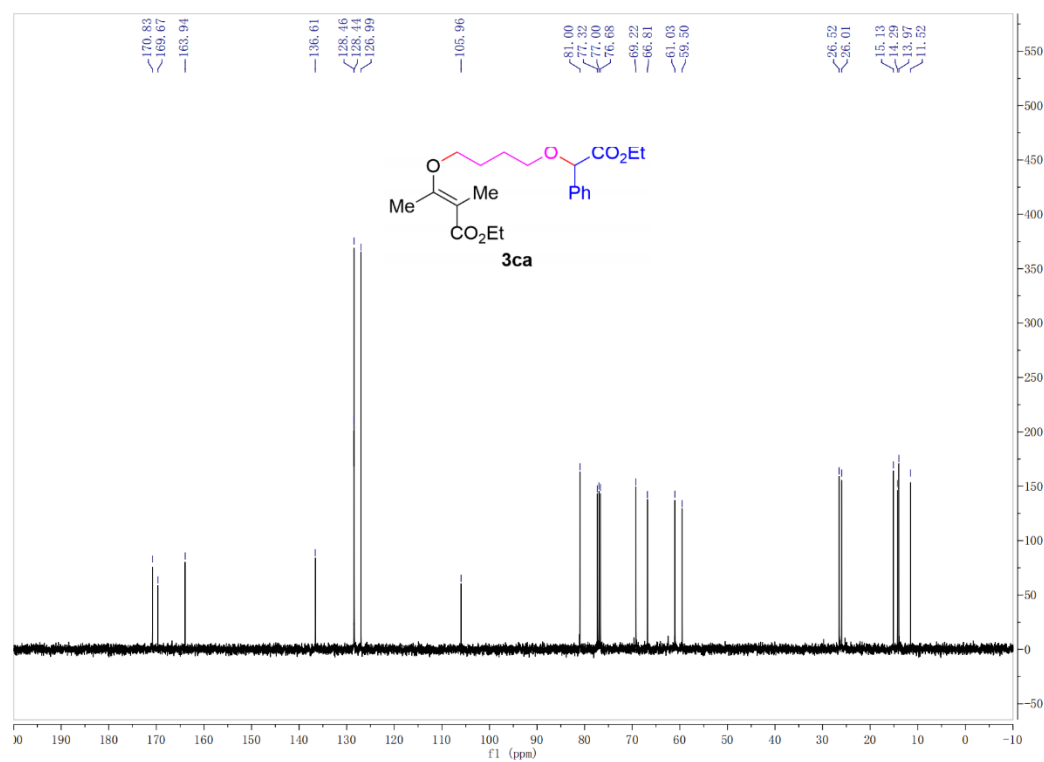

### $^1\text{H}$ NMR (400 MHz, $\text{CDCl}_3$ ) Spectrum of 3da

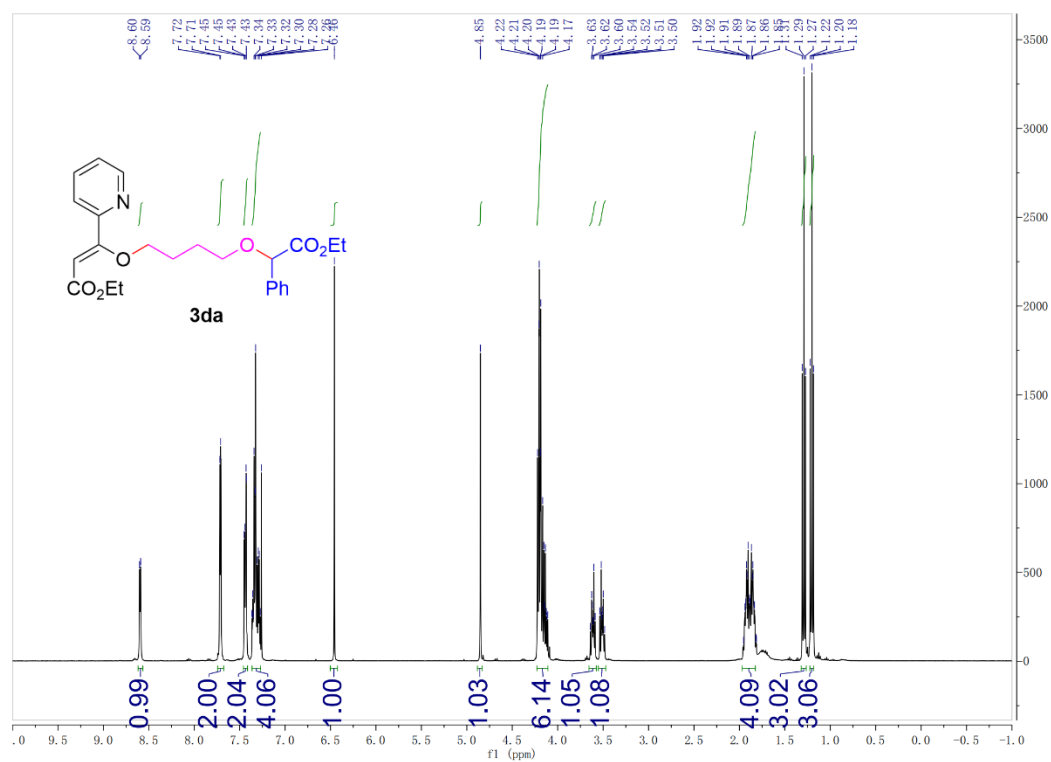

### $^{13}\text{C}\{^1\text{H}\}$ NMR (100 MHz, $d_6$ -DMSO) Spectrum of 3da

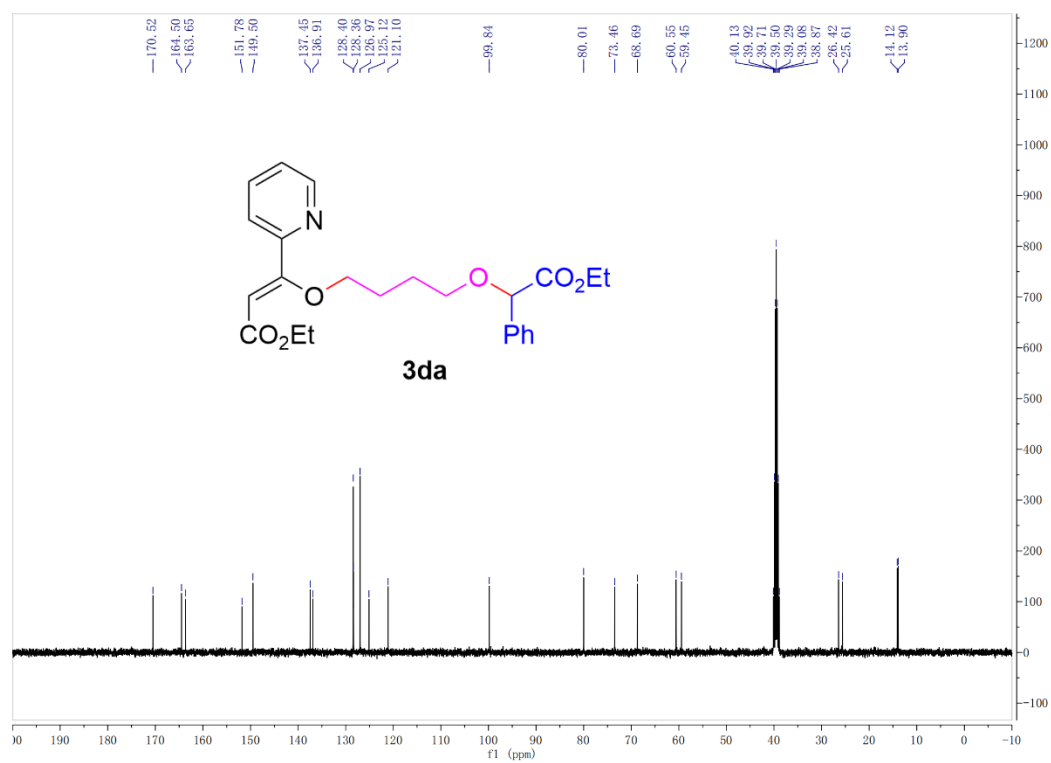



### $^1\text{H}$ NMR (400 MHz, $d_6$ -DMSO) Spectrum of 3ea

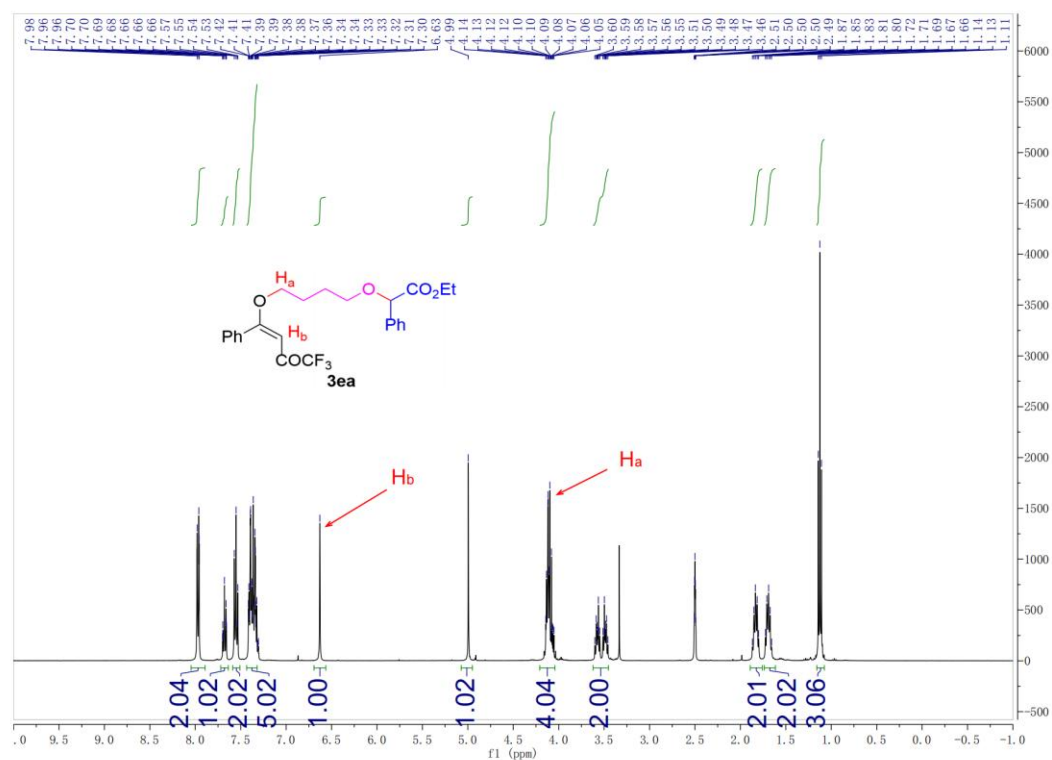

NOESY NMR (400 MHz,  $d_6$ -DMSO) Spectrum of 3ea. Based on the obvious NOE effect in H<sub>a</sub> and H<sub>b</sub>, the stereochemistry is *E*.

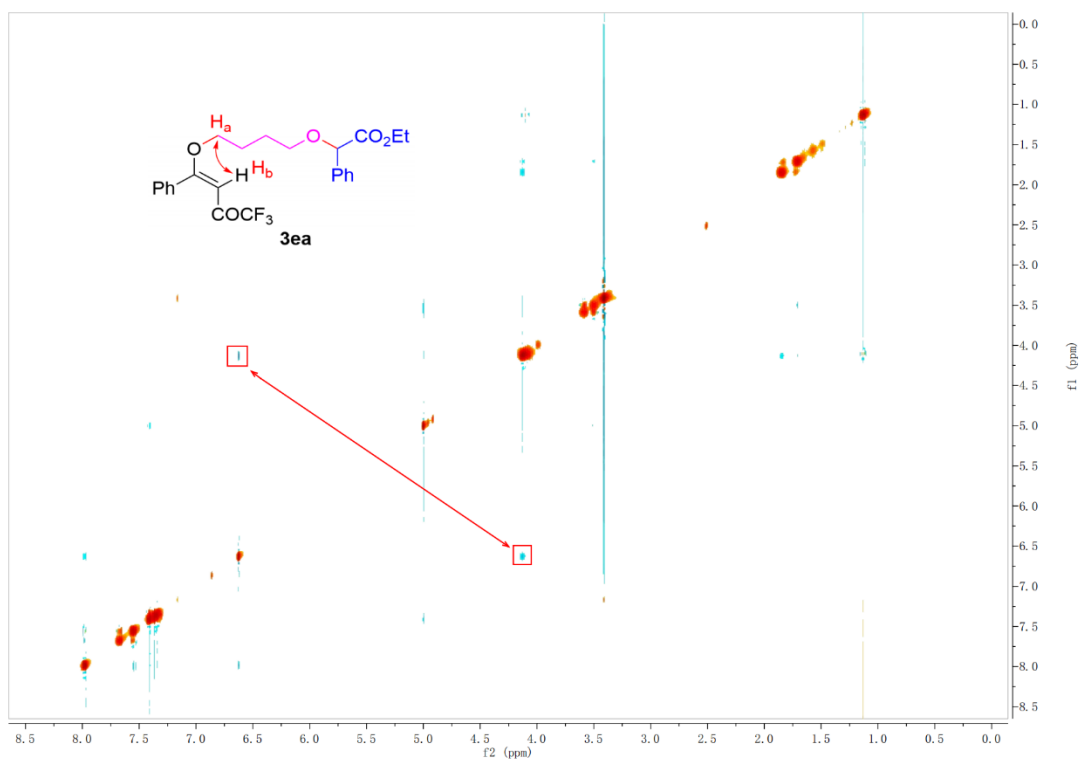

**$^{13}\text{C}\{^1\text{H}\}$  NMR (100 MHz,  $d_6$ -DMSO) Spectrum of 3ea**

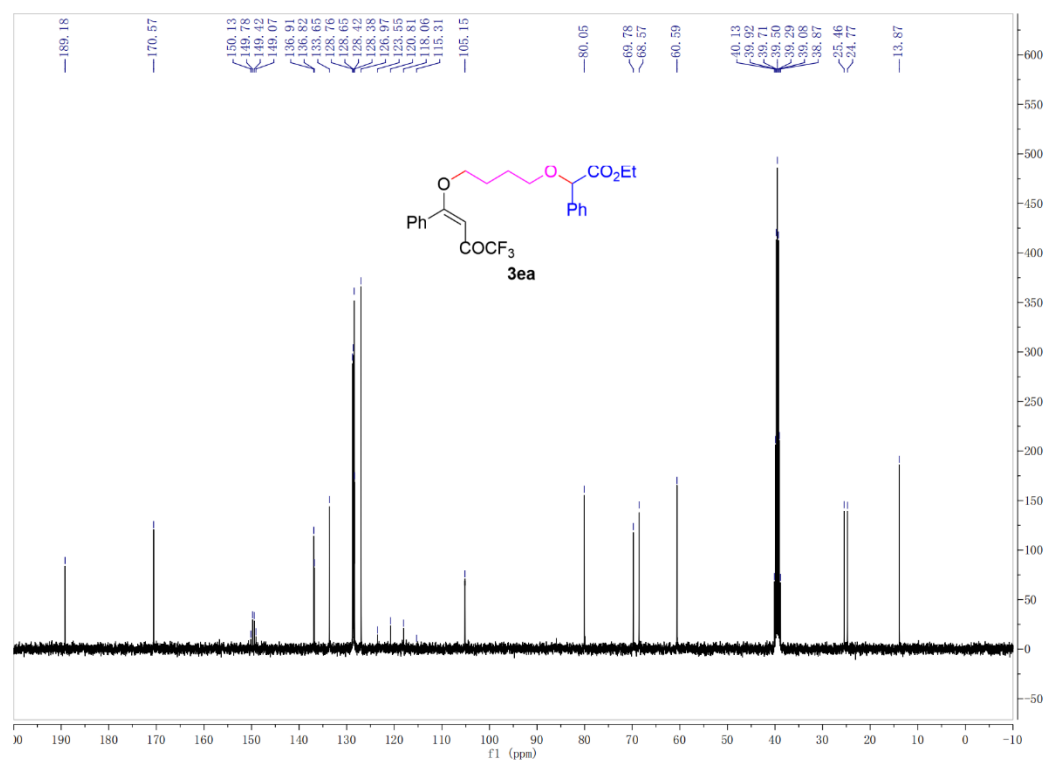

### $^1\text{H}$ NMR (400 MHz, $d_6$ -DMSO) Spectrum of 3fa

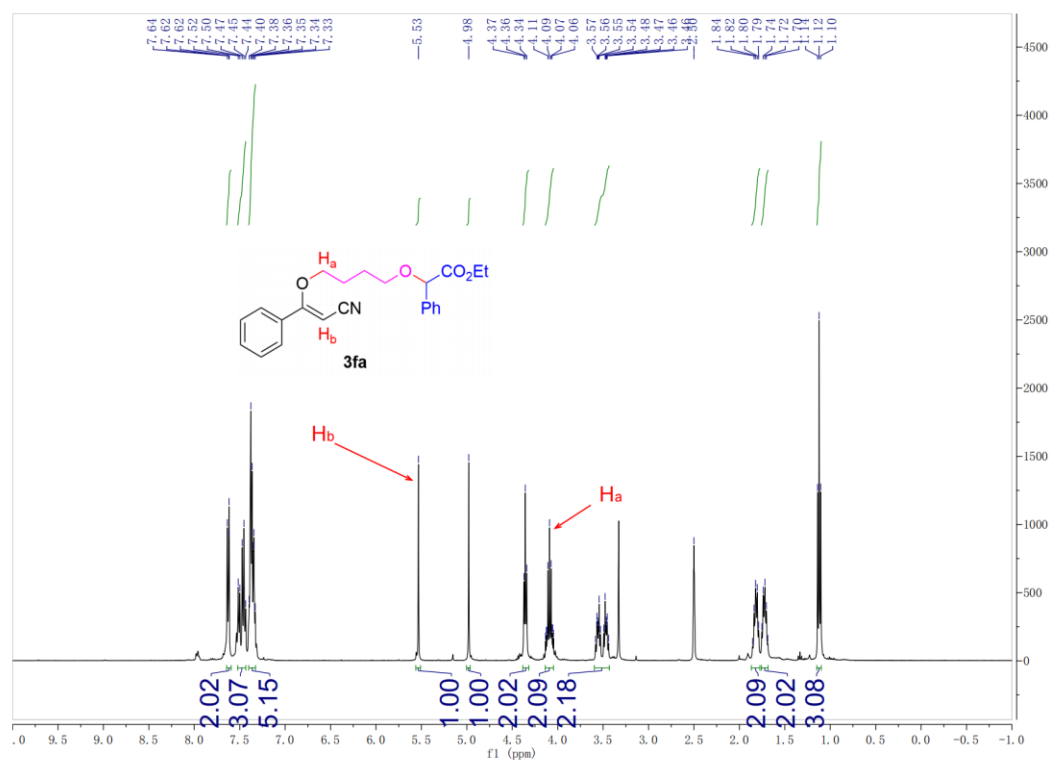

NOESY NMR (400 MHz,  $d_6$ -DMSO) Spectrum of 3fa. Based on no NOE effect in  $H_a$  and  $H_b$ , the stereochemistry is Z.

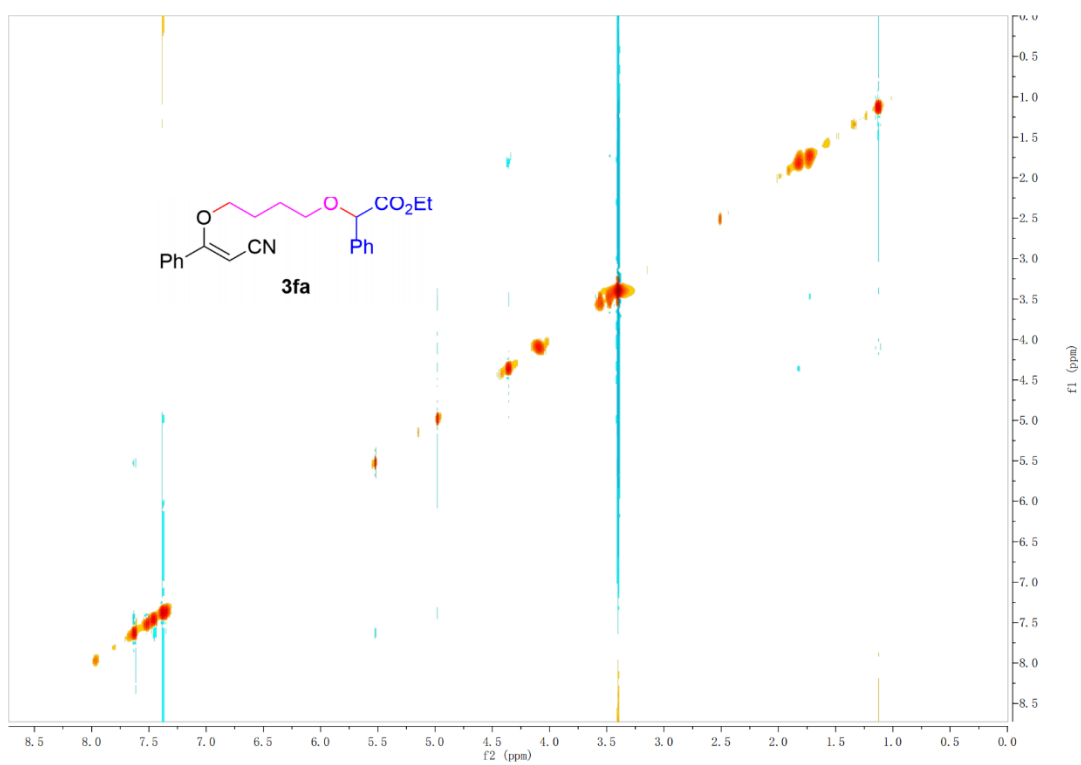

**$^{13}\text{C}\{^1\text{H}\}$  NMR (100 MHz,  $d_6$ -DMSO) Spectrum of 3fa**

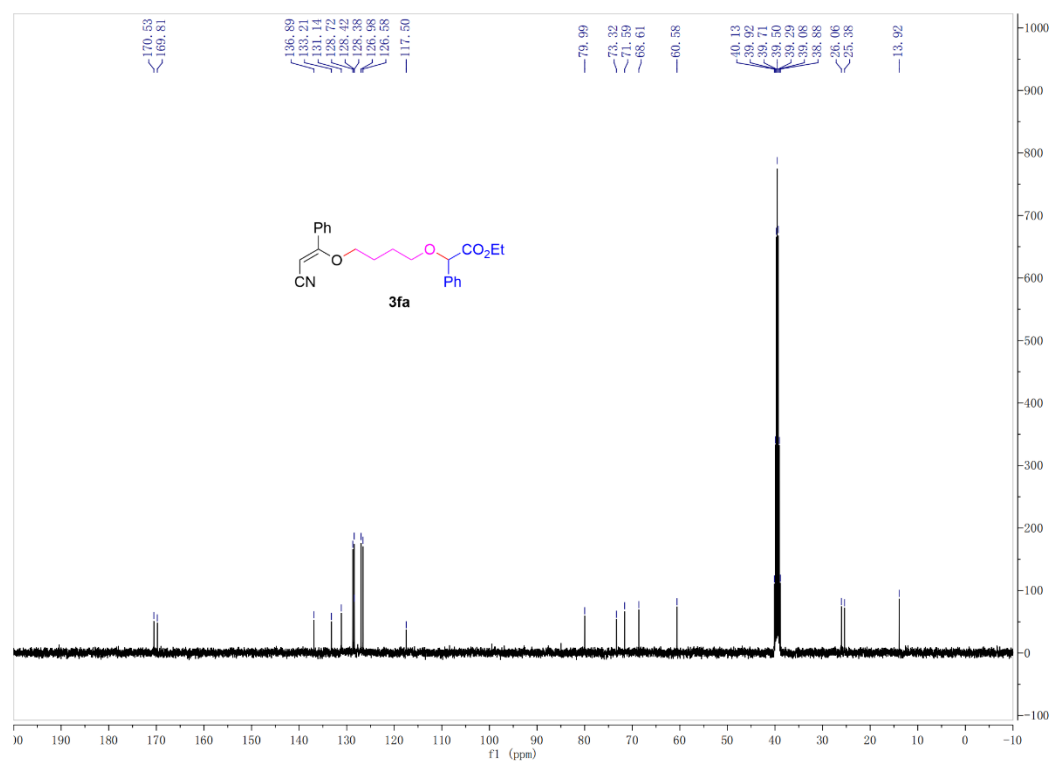

### $^1\text{H}$ NMR (400 MHz, $\text{CD}_3\text{OD}$ ) Spectrum of 3ga

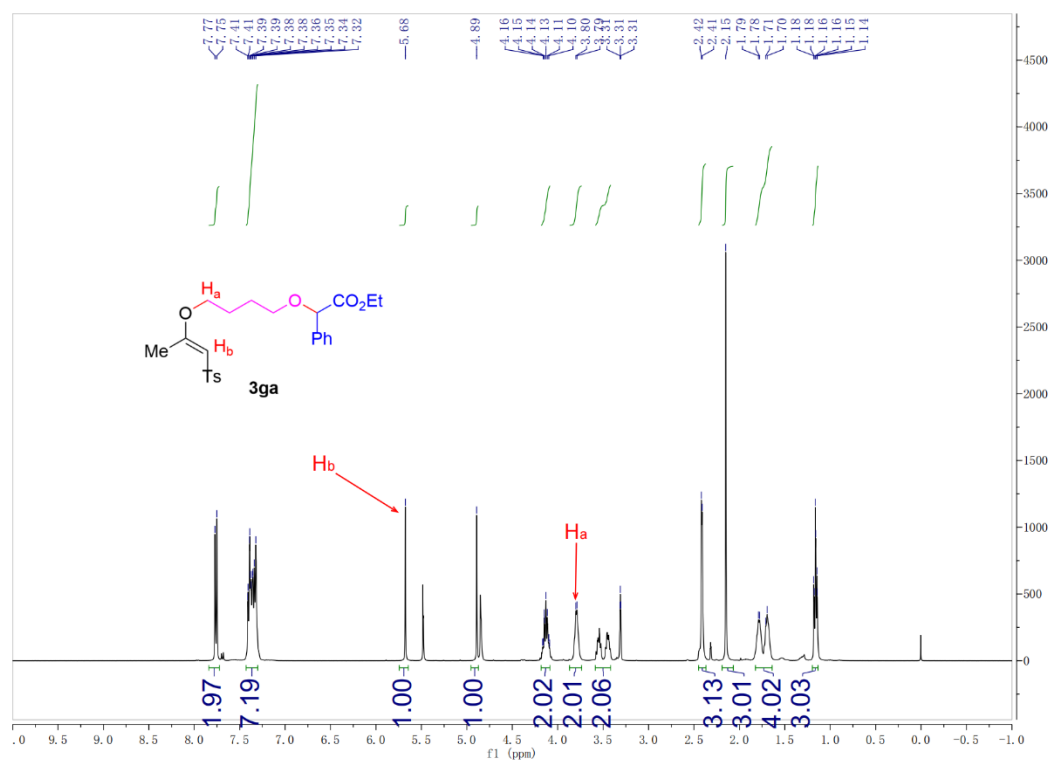

**NOESY NMR (400 MHz,  $\text{CD}_3\text{OD}$ ) Spectrum of 3ga.** Based on the obvious NOE effect in  $\text{H}_a$  and  $\text{H}_b$ , the stereochemistry is *E*.

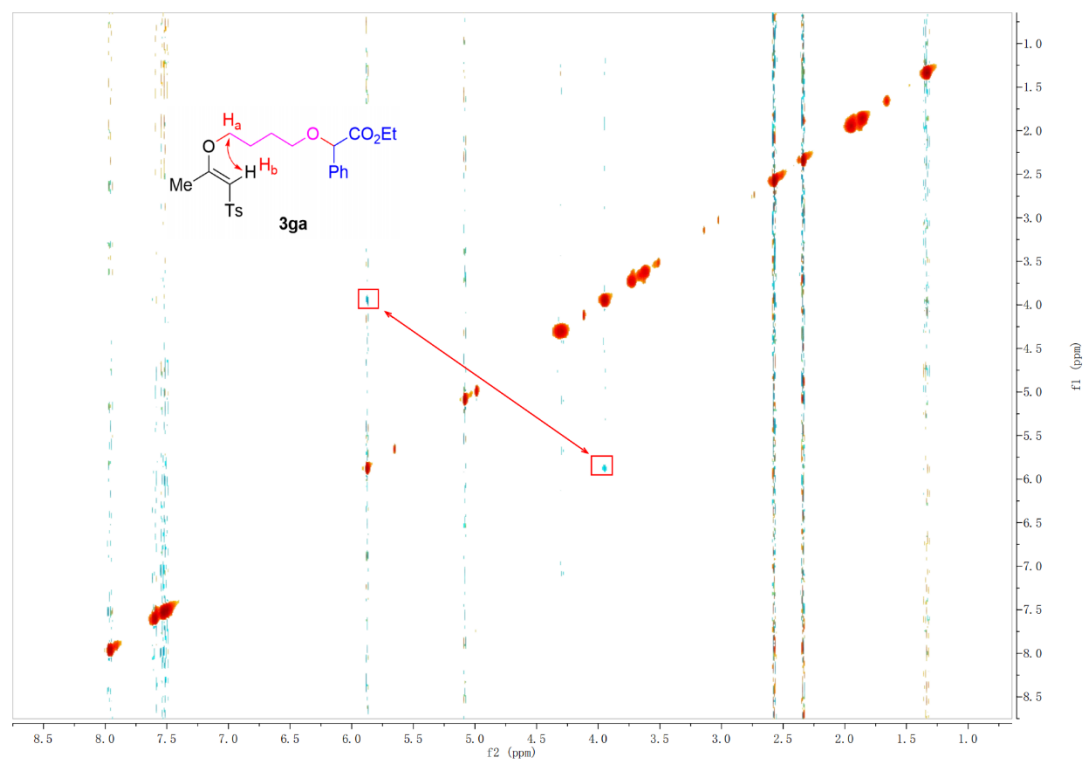

**$^{13}\text{C}\{^1\text{H}\}$  NMR (100 MHz,  $\text{CD}_3\text{OD}$ ) Spectrum of 3ga**

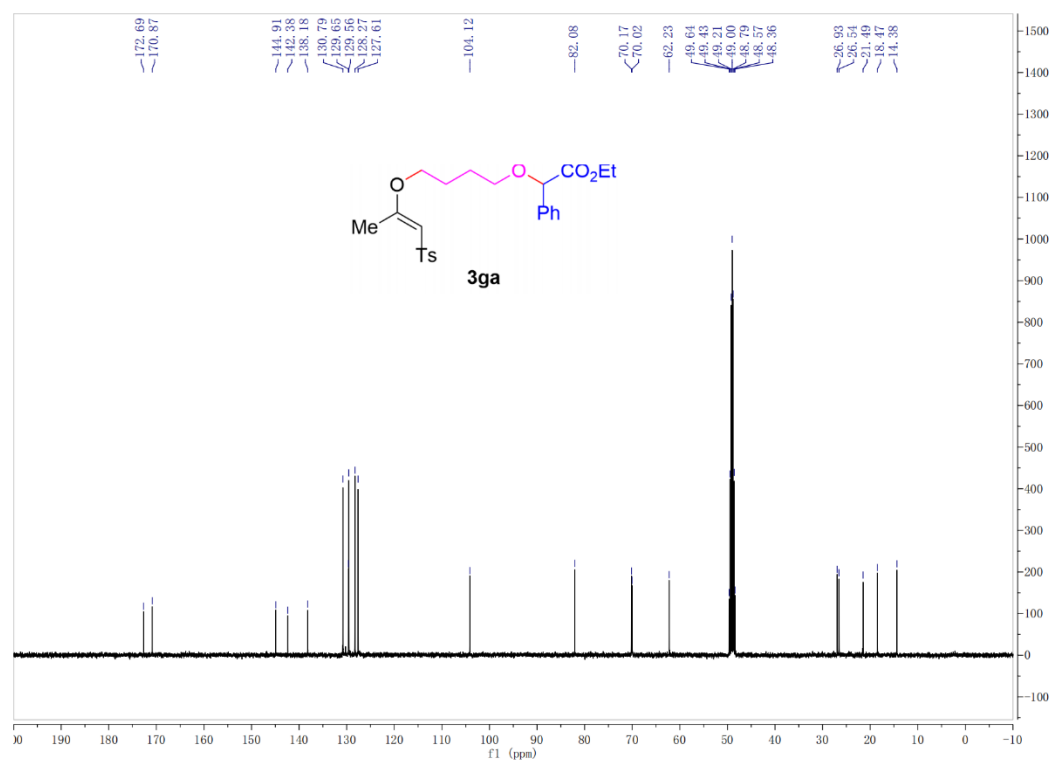

### $^1\text{H}$ NMR (400 MHz, $d_6$ -DMSO) Spectrum of 3ha

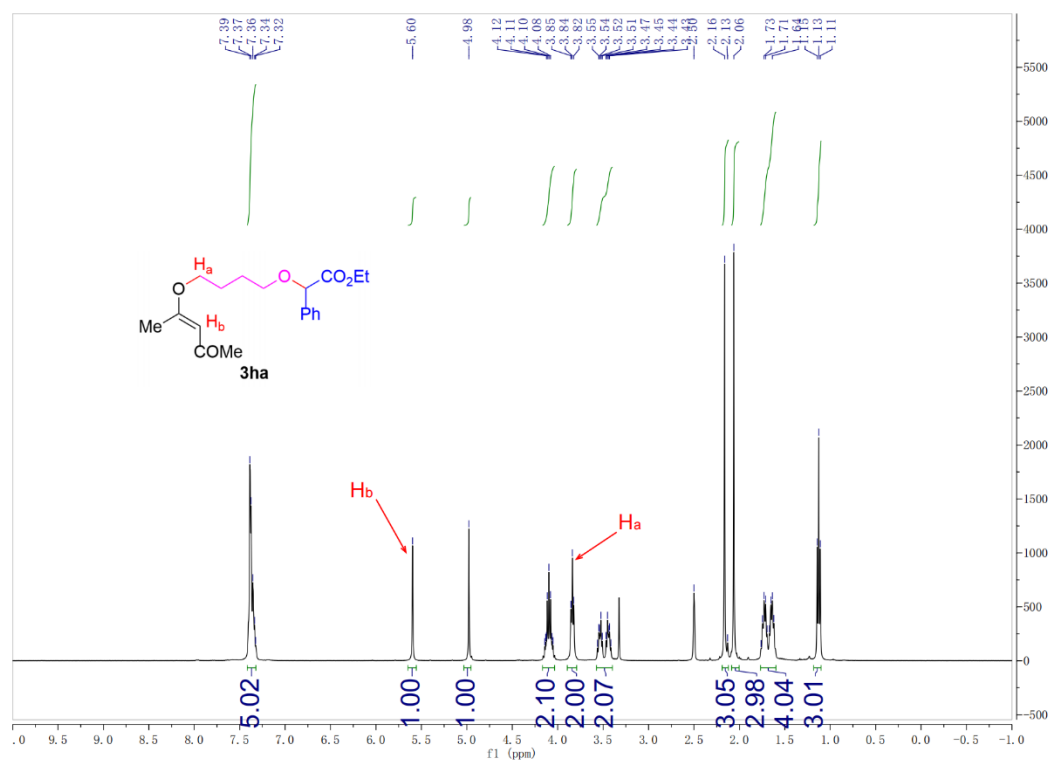

NOESY NMR (400 MHz,  $d_6$ -DMSO) Spectrum of 3ha. Based on the obvious NOE effect in  $H_a$  and  $H_b$ , the stereochemistry is *E*.

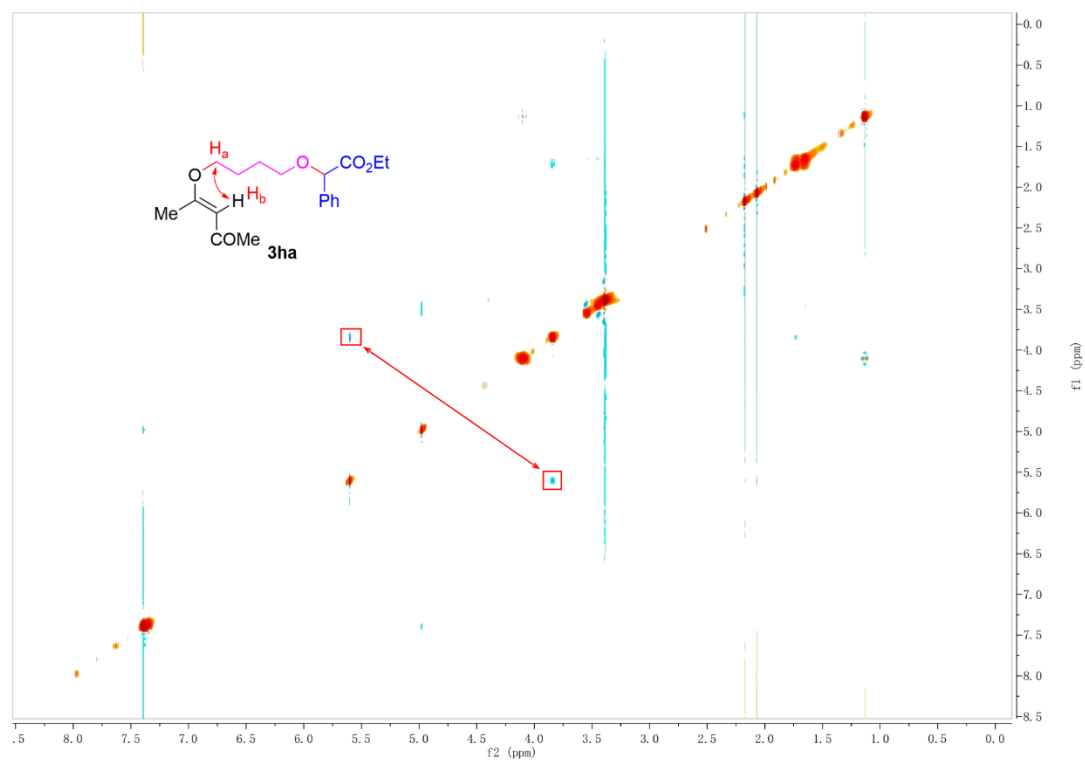

**$^{13}\text{C}\{^1\text{H}\}$  NMR (100 MHz,  $d_6$ -DMSO) Spectrum of 3ha**

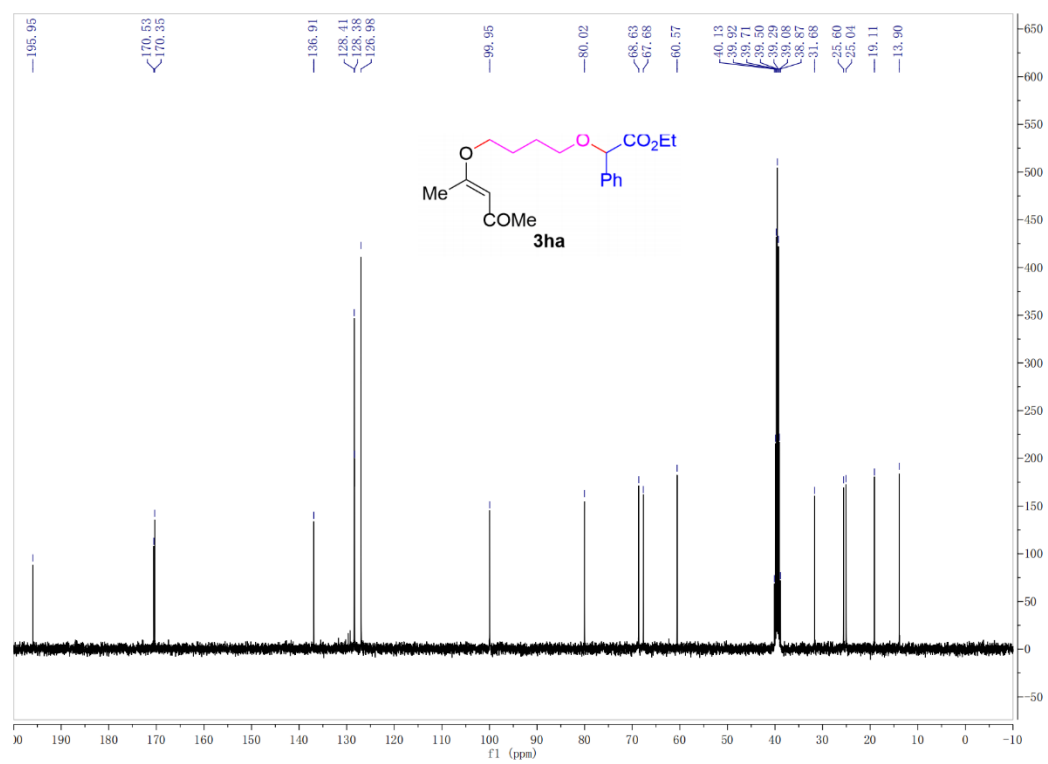



### $^1\text{H}$ NMR (400 MHz, $d_6$ -DMSO) Spectrum of 3ia

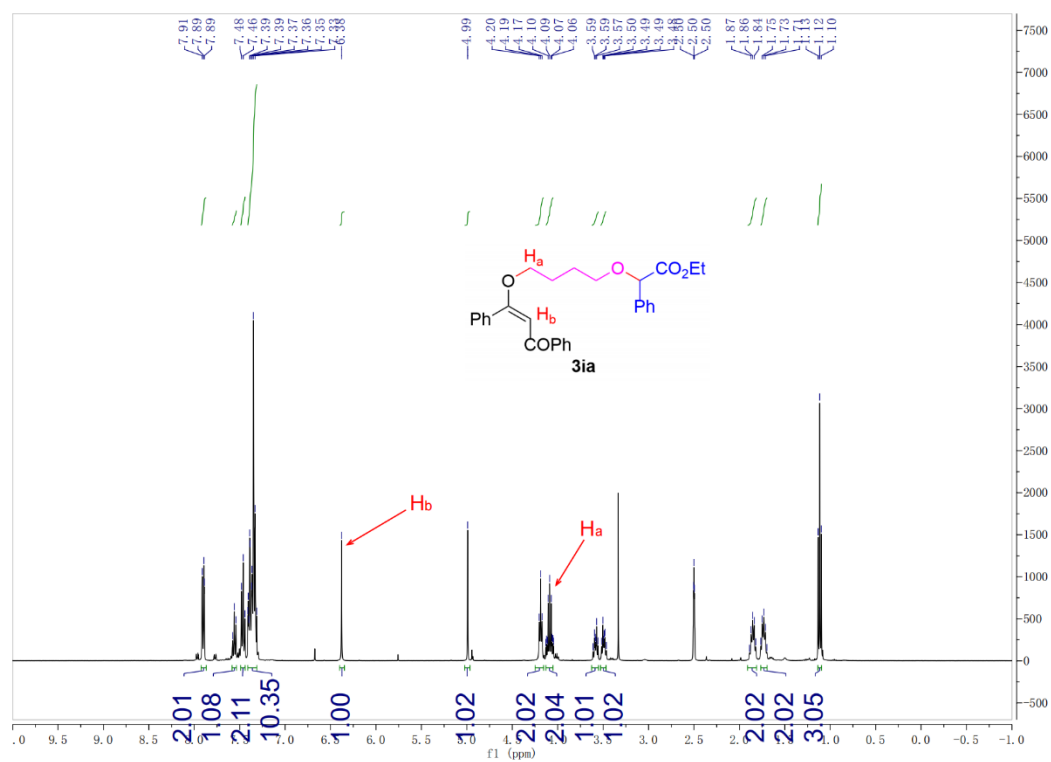

NOESY NMR (400 MHz,  $d_6$ -DMSO) Spectrum of 3ia. Based on the obvious NOE effect in  $H_a$  and  $H_b$ , the stereochemistry is *E*.

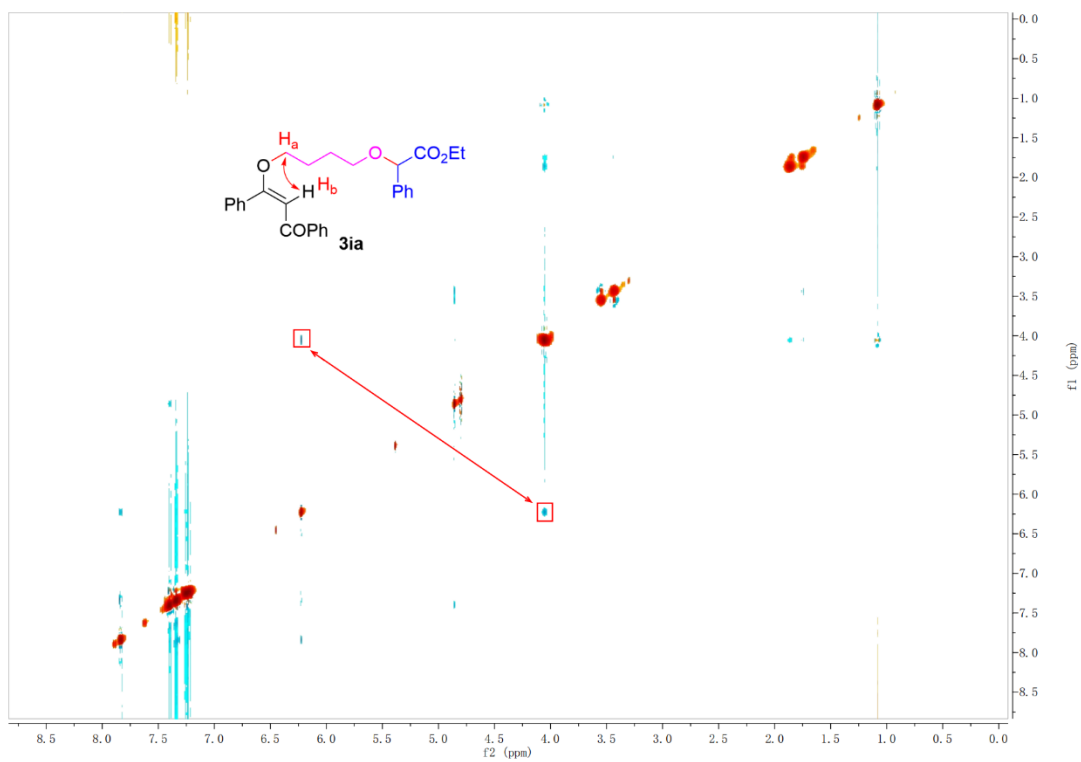

**$^{13}\text{C}\{^1\text{H}\}$  NMR (100 MHz,  $d_6$ -DMSO) Spectrum of 3ia**

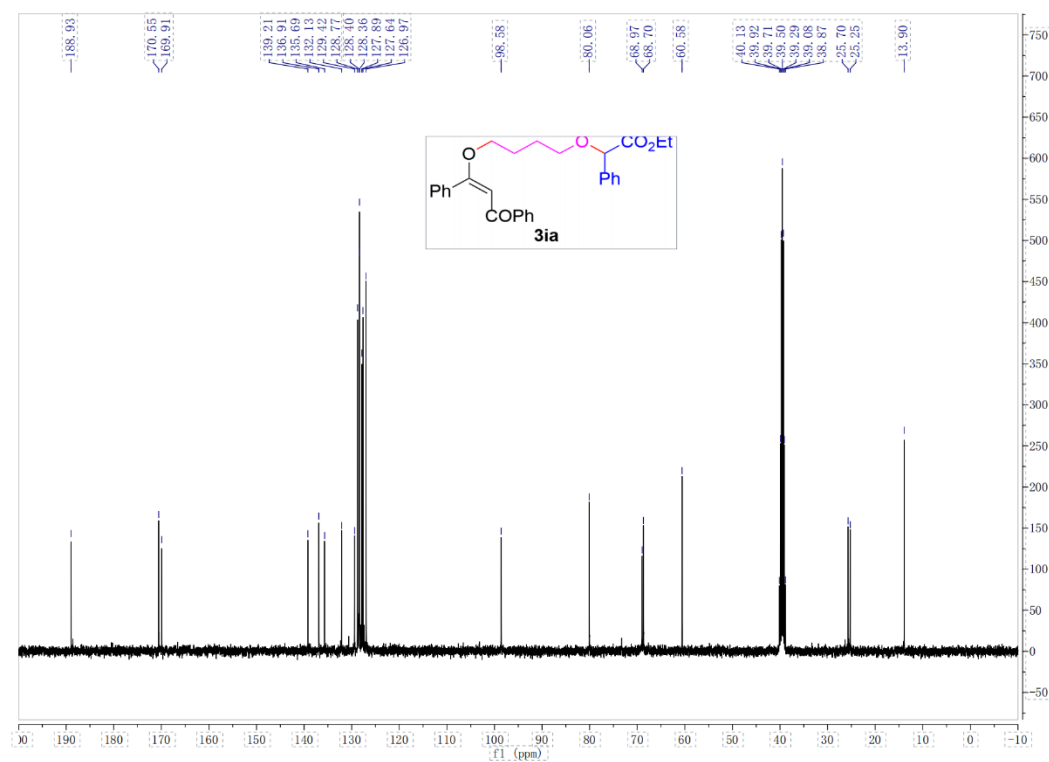

### <sup>1</sup>H NMR (400 MHz, CD<sub>3</sub>OD) Spectrum of 3ja

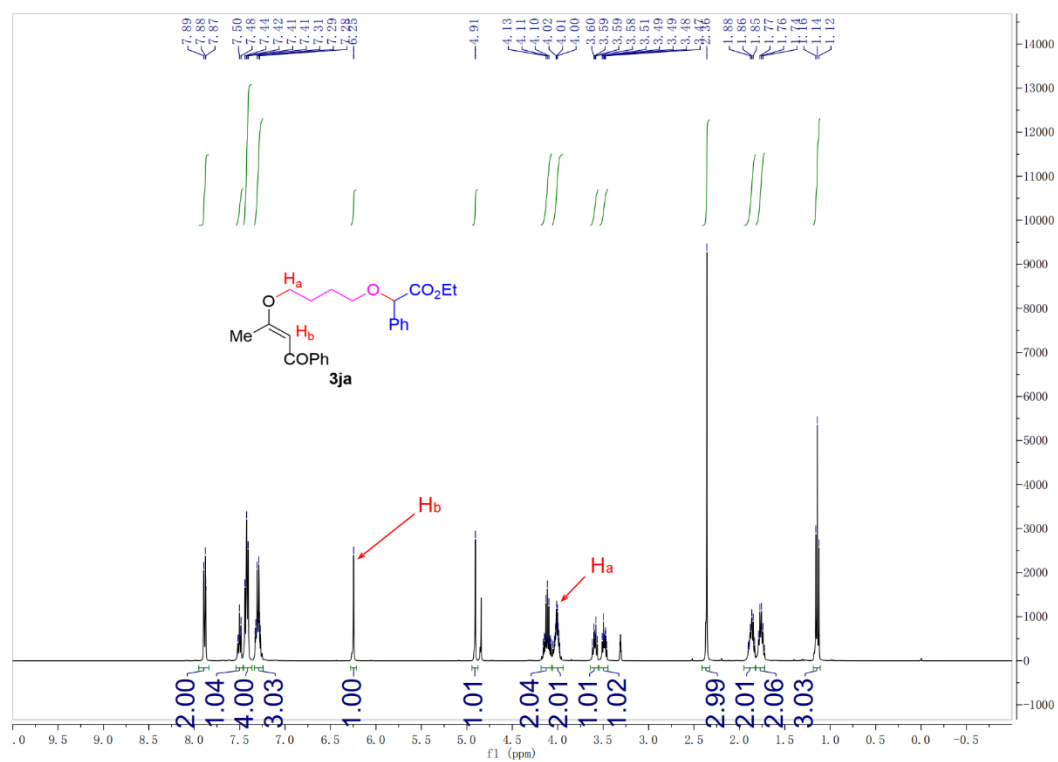

NOESY NMR (400 MHz, CD<sub>3</sub>OD) Spectrum of 3ja. Based on the obvious NOE effect in  $H_a$  and  $H_b$ , the stereochemistry is *E*.

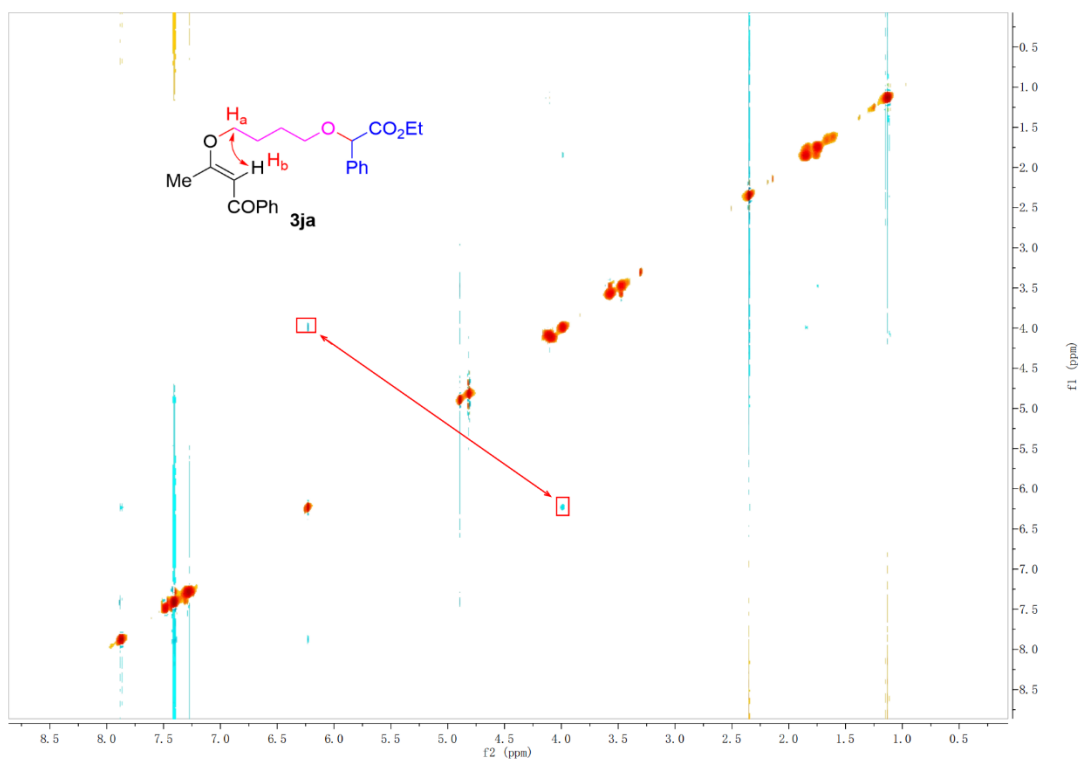

**$^{13}\text{C}\{^1\text{H}\}$  NMR (100 MHz,  $\text{CD}_3\text{OD}$ ) Spectrum of 3ja**

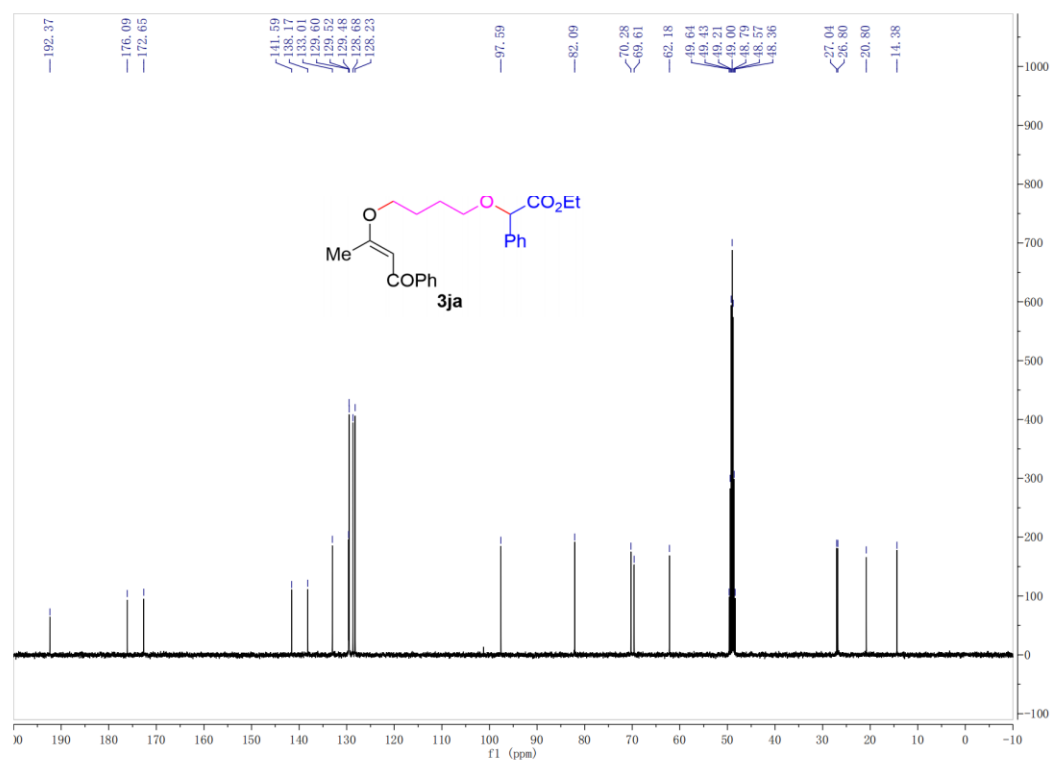

### <sup>1</sup>H NMR (400 MHz, CD<sub>3</sub>OD) Spectrum of 3ja'

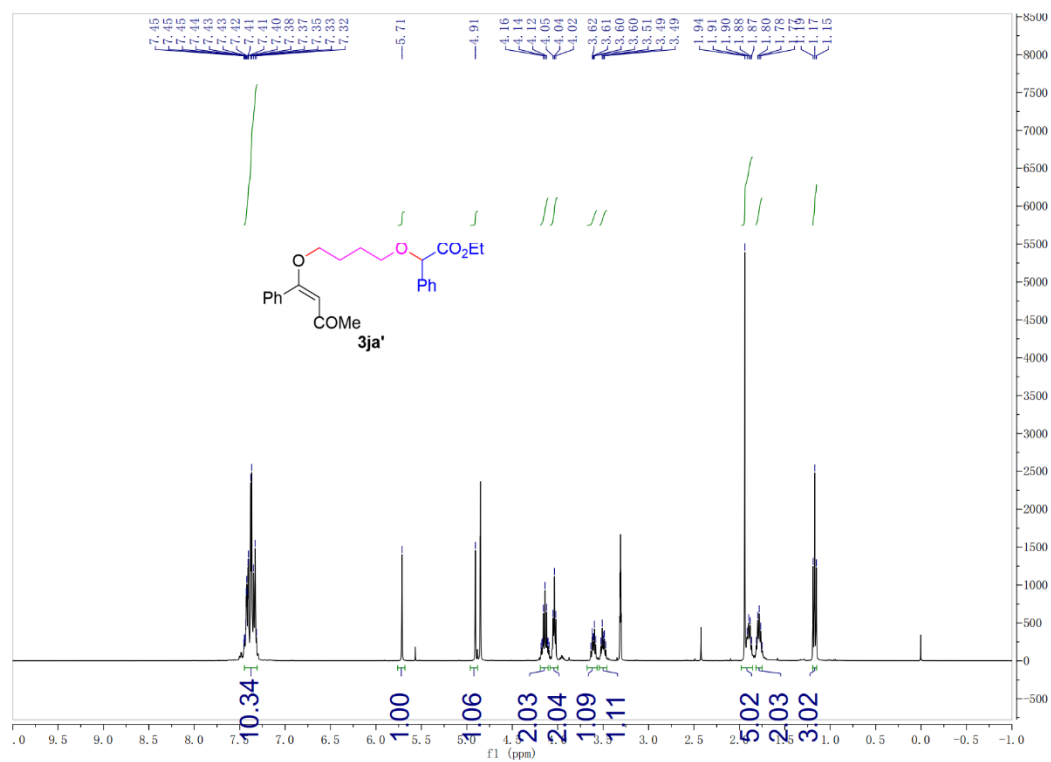

### <sup>13</sup>C{<sup>1</sup>H} NMR (100 MHz, CD<sub>3</sub>OD) Spectrum of 3ja'

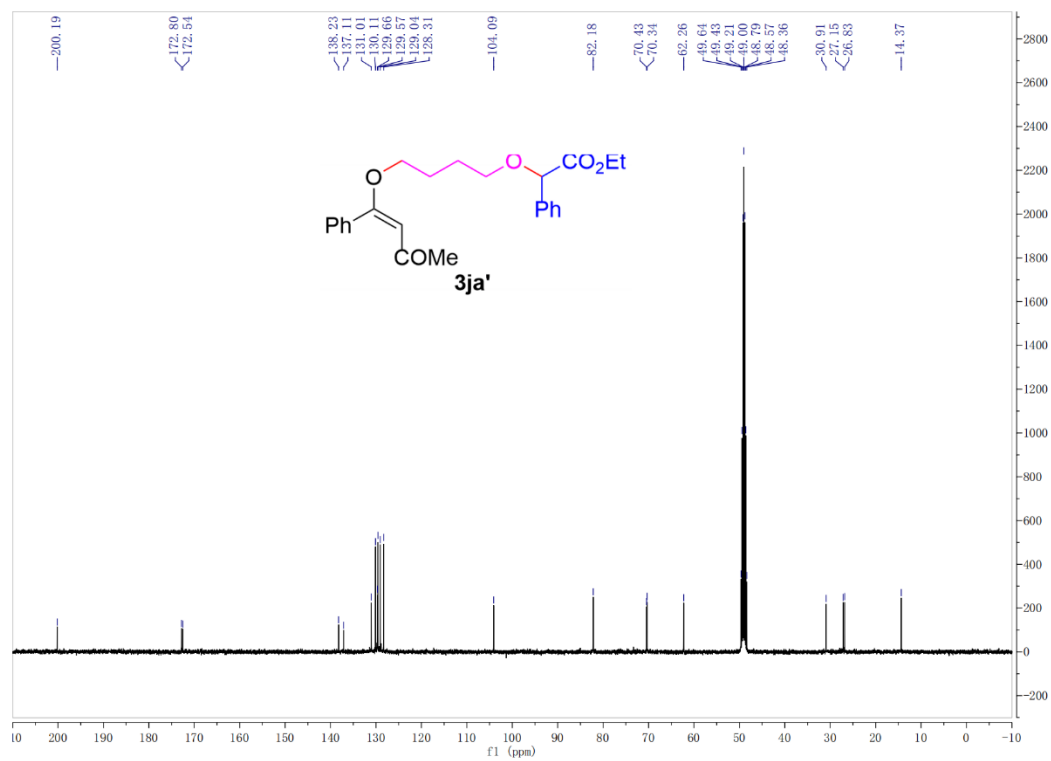

### <sup>1</sup>H NMR (400 MHz, CD<sub>3</sub>OD) Spectrum of 3ka

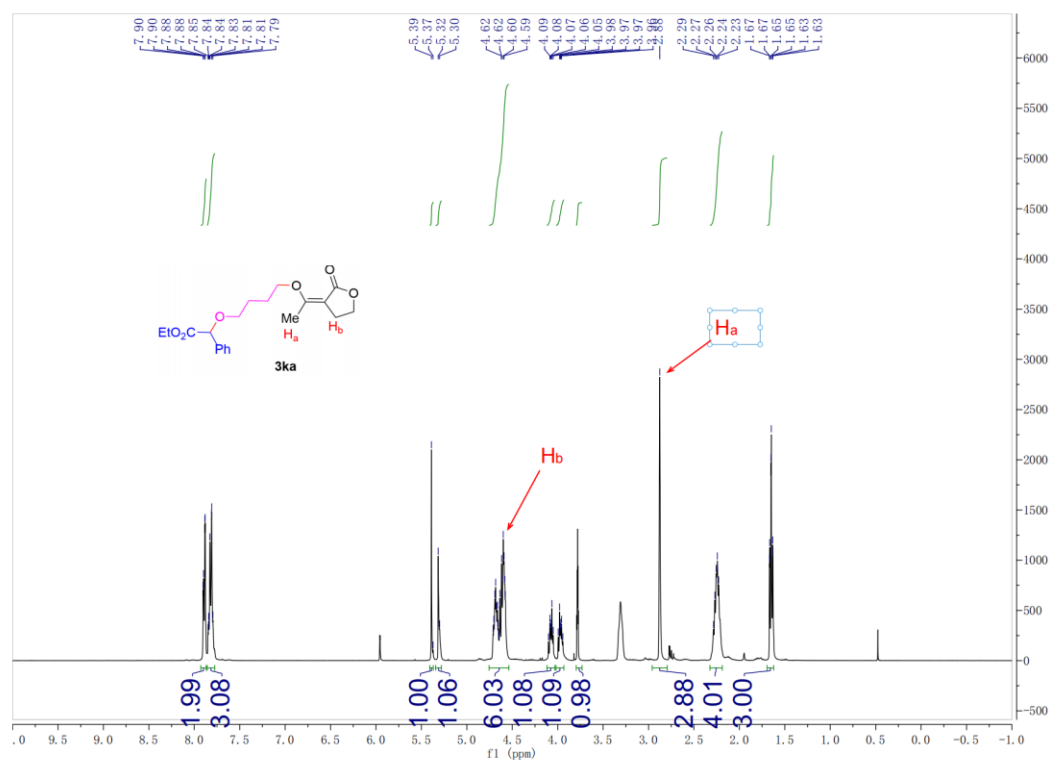

NOESY NMR (400 MHz, CD<sub>3</sub>OD) Spectrum of 3ka. Based on the obvious NOE effect in  $H_a$  and  $H_b$ , the stereochemistry is *E*.

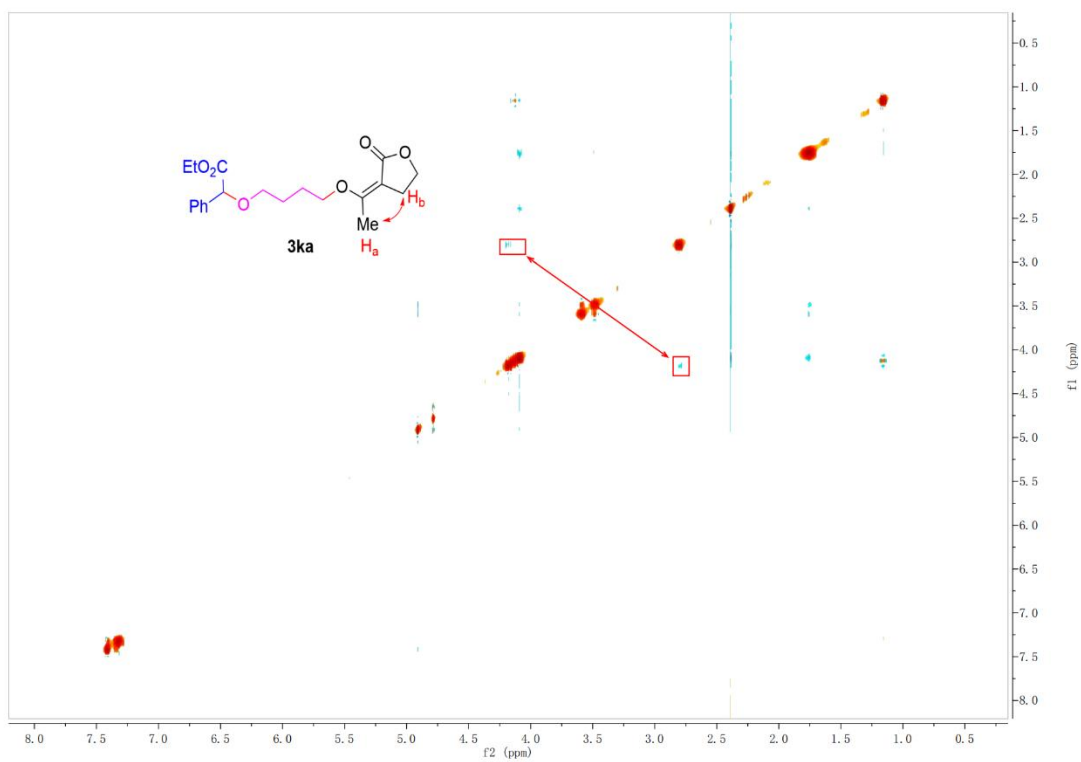

**$^{13}\text{C}\{^1\text{H}\}$  NMR (100 MHz,  $\text{CD}_3\text{OD}$ ) Spectrum of 3ka**

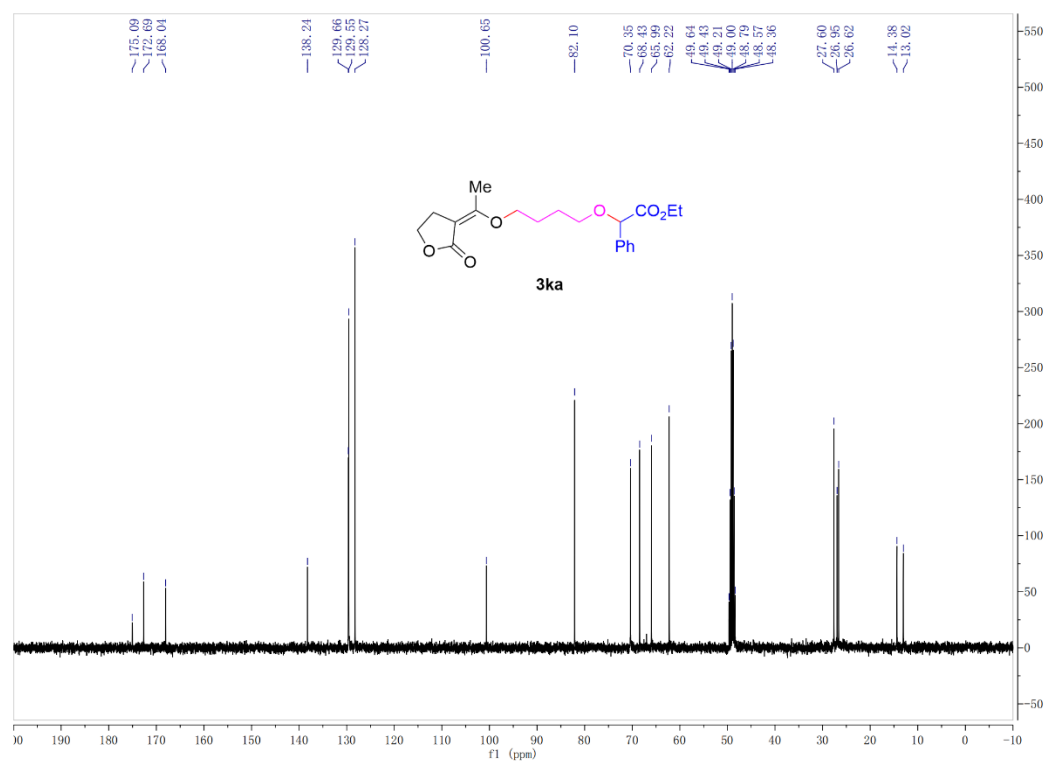

### <sup>1</sup>H NMR (400 MHz, CD<sub>3</sub>OD) Spectrum of 3la

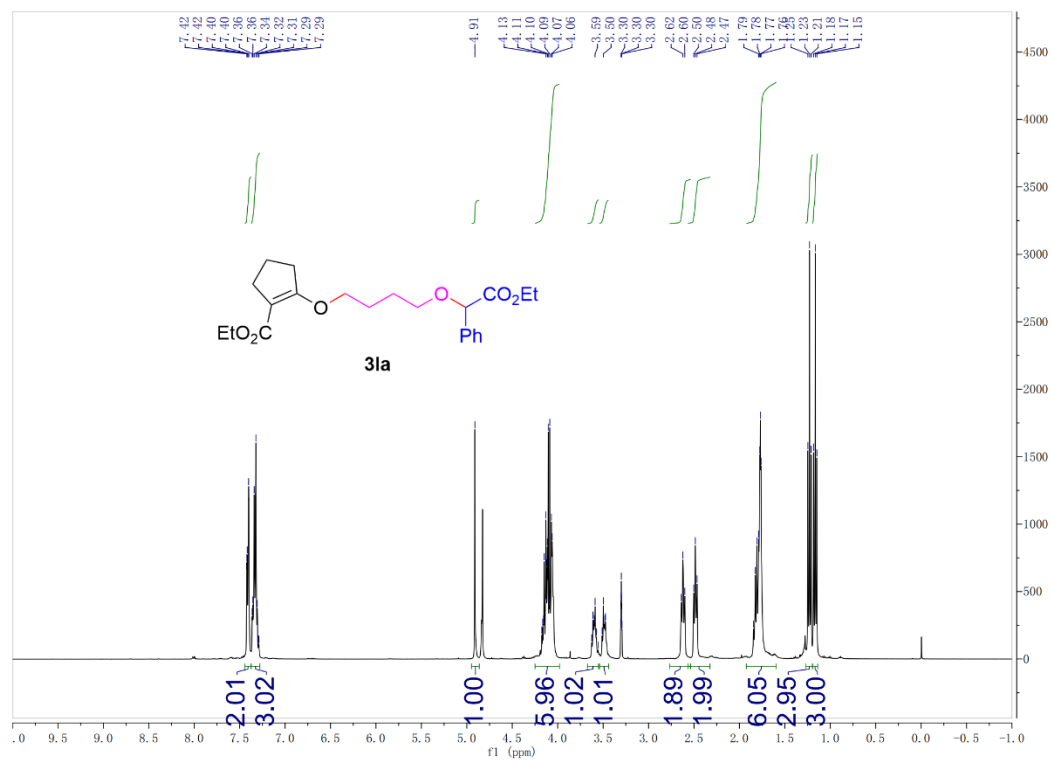

### <sup>13</sup>C{<sup>1</sup>H} NMR (100 MHz, CD<sub>3</sub>OD) Spectrum of 3la

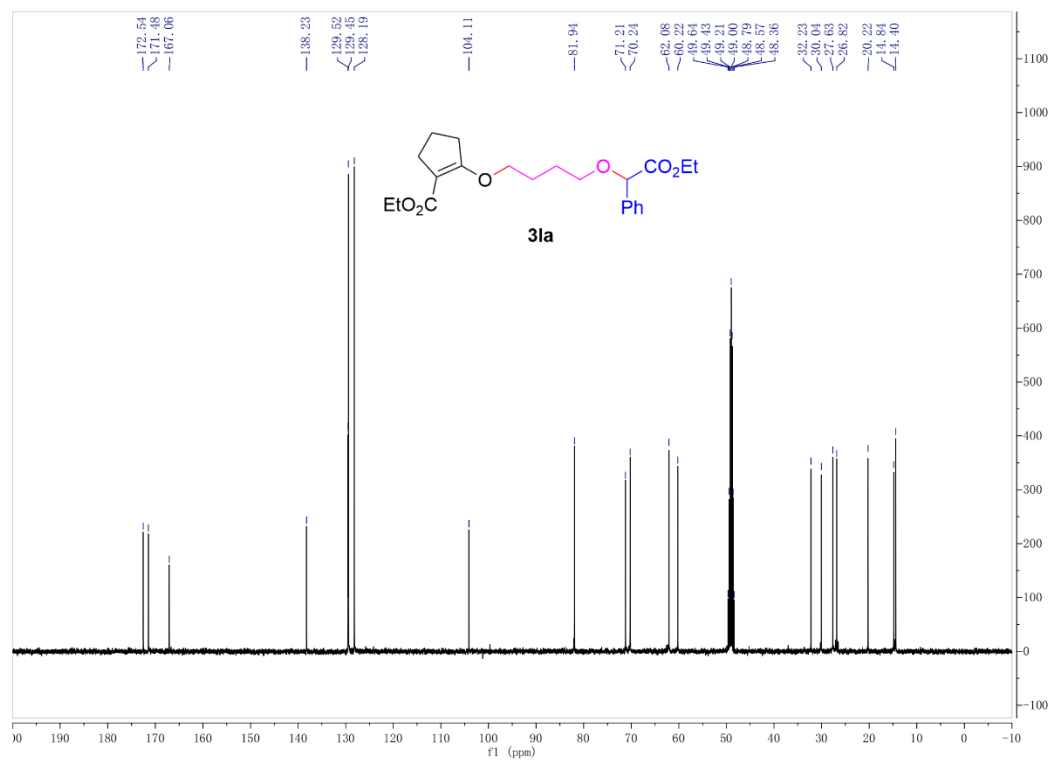



### $^1\text{H}$ NMR (400 MHz, $\text{CDCl}_3$ ) Spectrum of 3ma

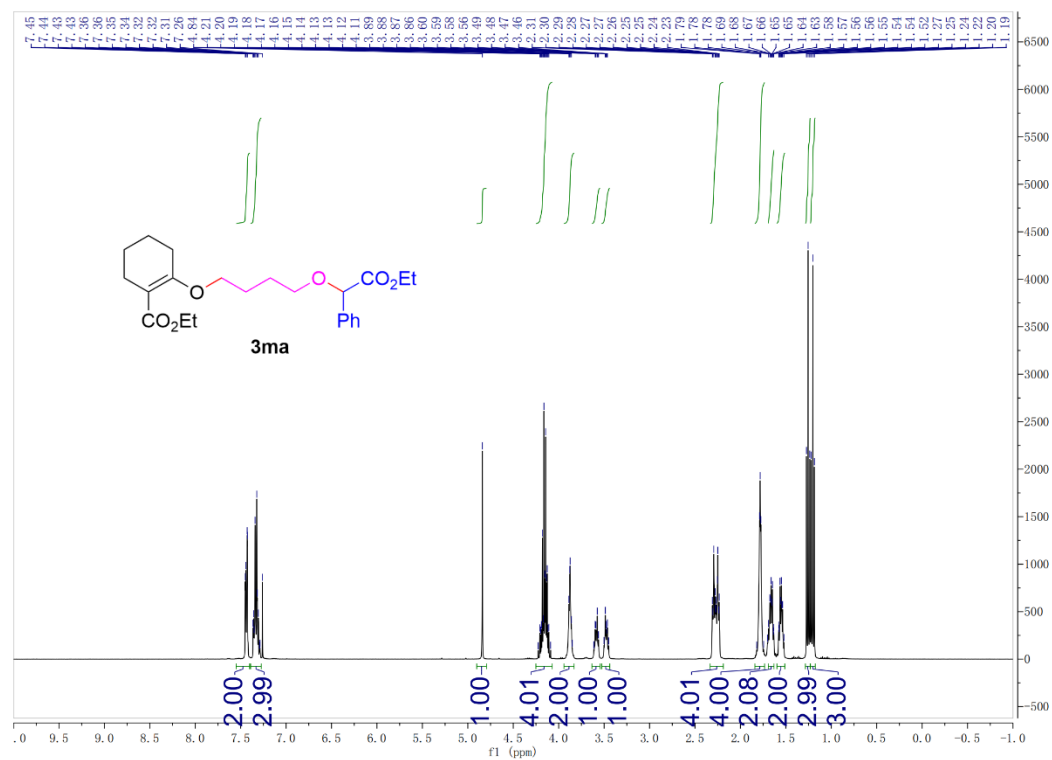

### $^{13}\text{C}\{^1\text{H}\}$ NMR (100 MHz, $\text{CDCl}_3$ ) Spectrum of 3ma

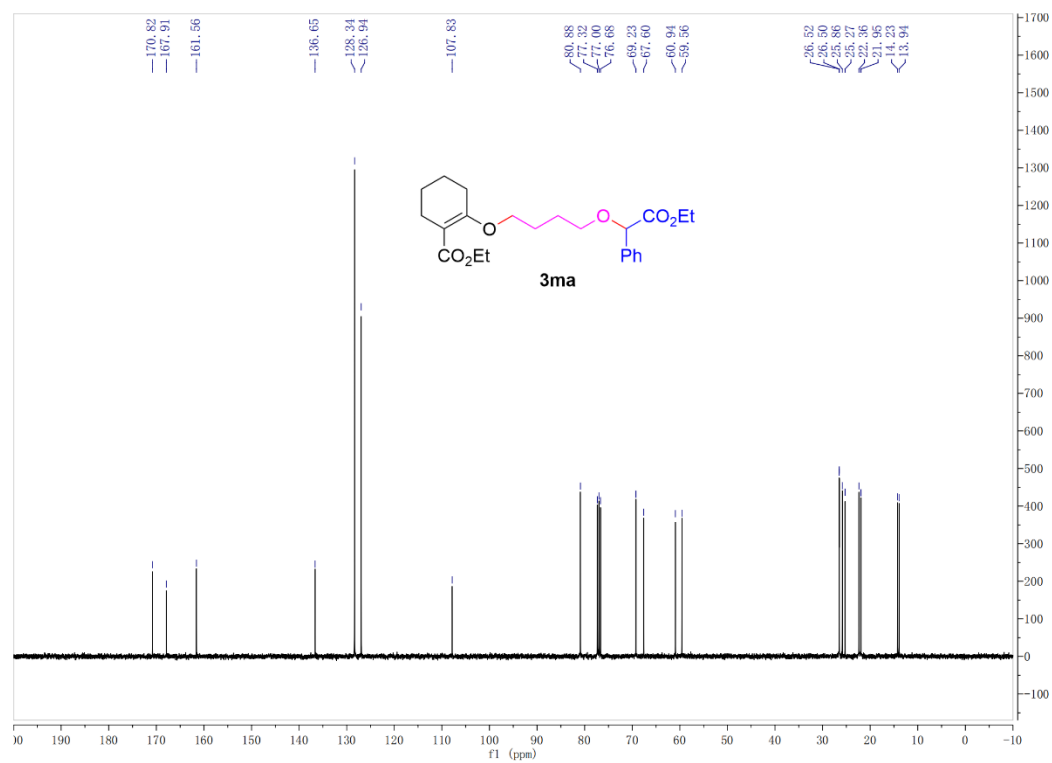

### <sup>1</sup>H NMR (400 MHz, CDCl<sub>3</sub>) Spectrum of 3na

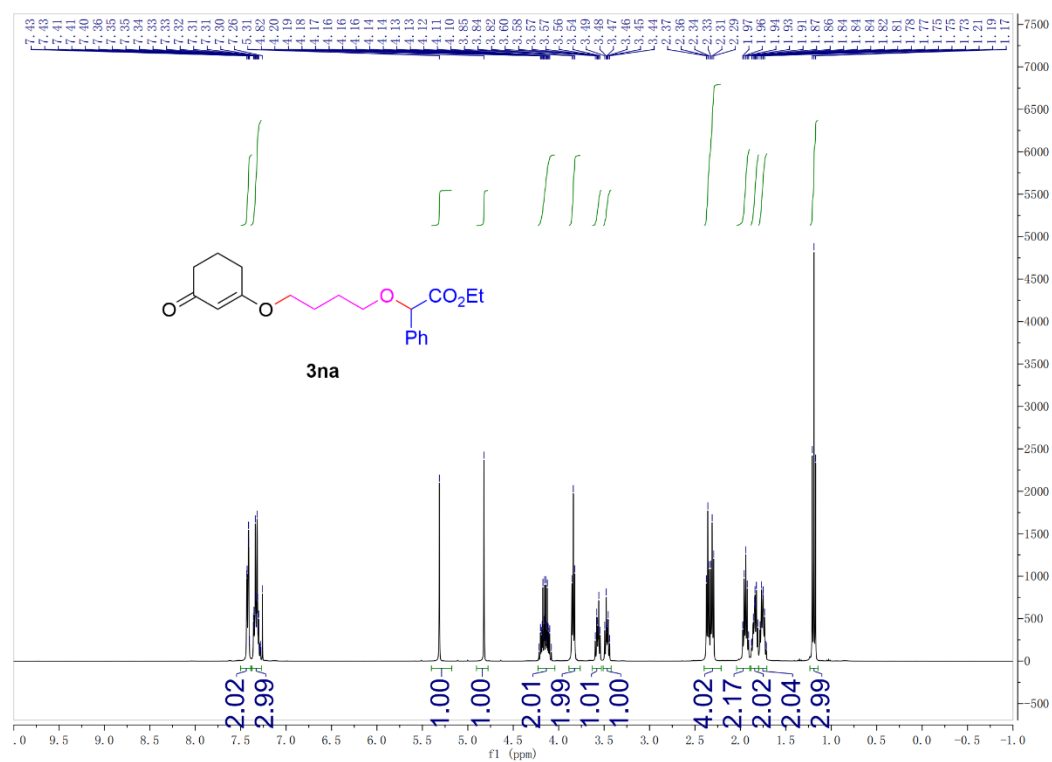

### <sup>13</sup>C{<sup>1</sup>H} NMR (100 MHz, CDCl<sub>3</sub>) Spectrum of 3na

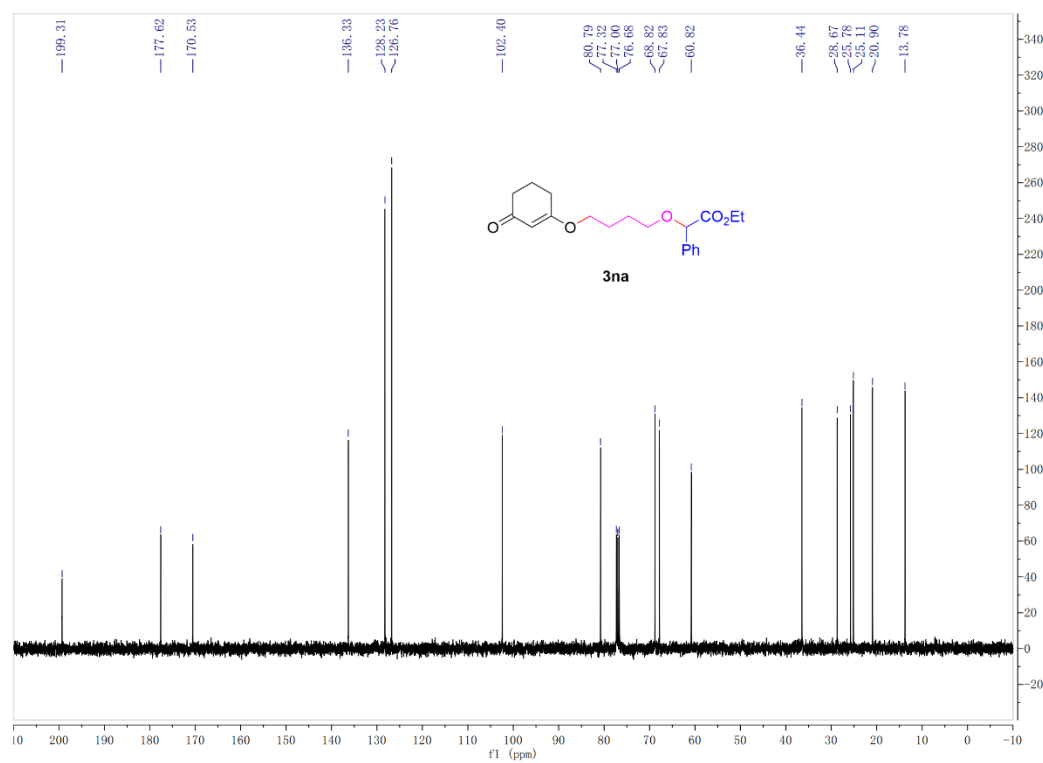

### <sup>1</sup>H NMR (400 MHz, CDCl<sub>3</sub>) Spectrum of 3oa

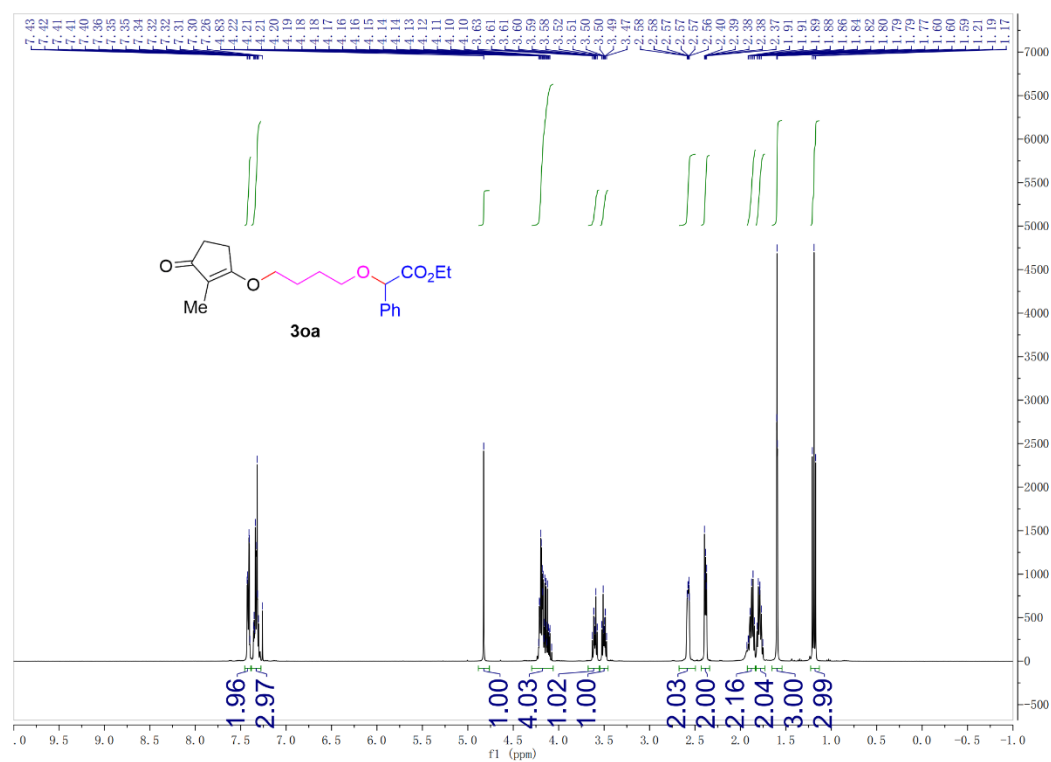

### <sup>13</sup>C{<sup>1</sup>H} NMR (100 MHz, CDCl<sub>3</sub>) Spectrum of 3oa

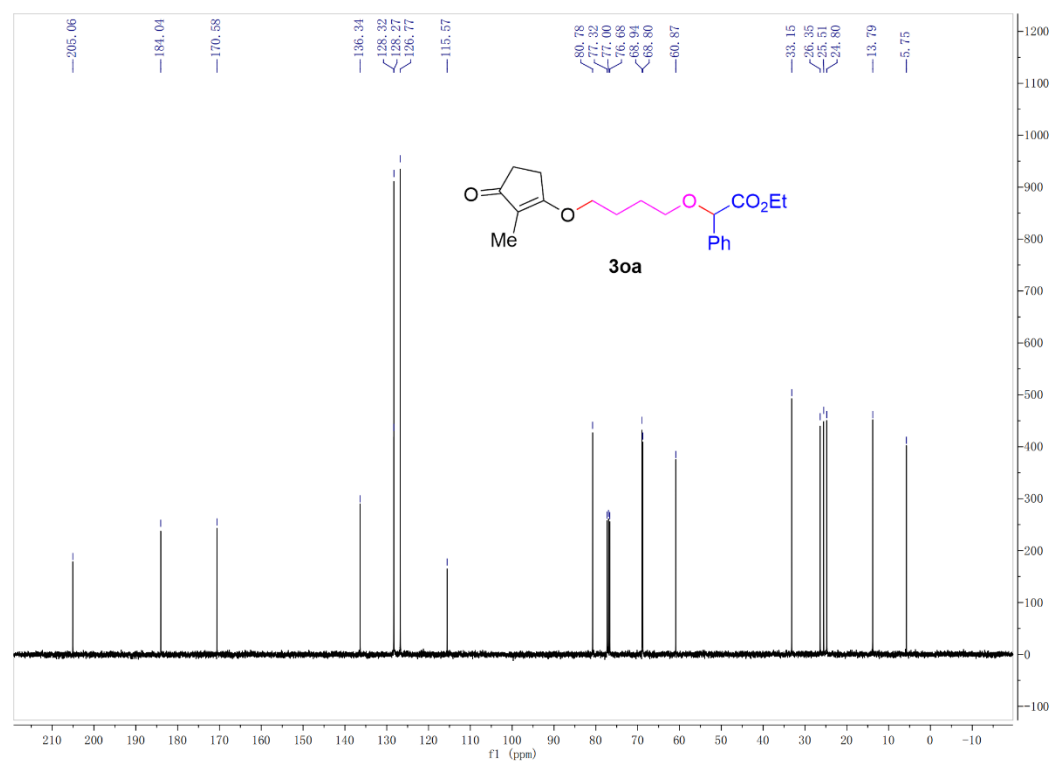

### <sup>1</sup>H NMR (400 MHz, CD<sub>3</sub>OD) Spectrum of 3pa

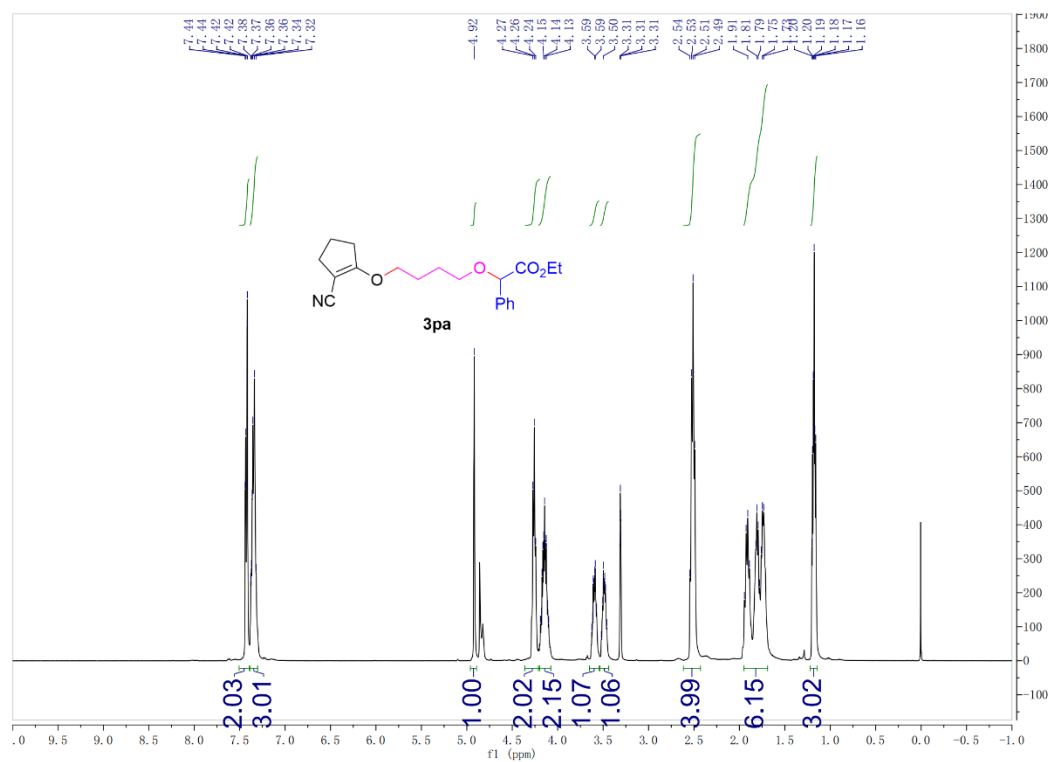

### <sup>13</sup>C{<sup>1</sup>H} NMR (100 MHz, CD<sub>3</sub>OD) Spectrum of 3pa

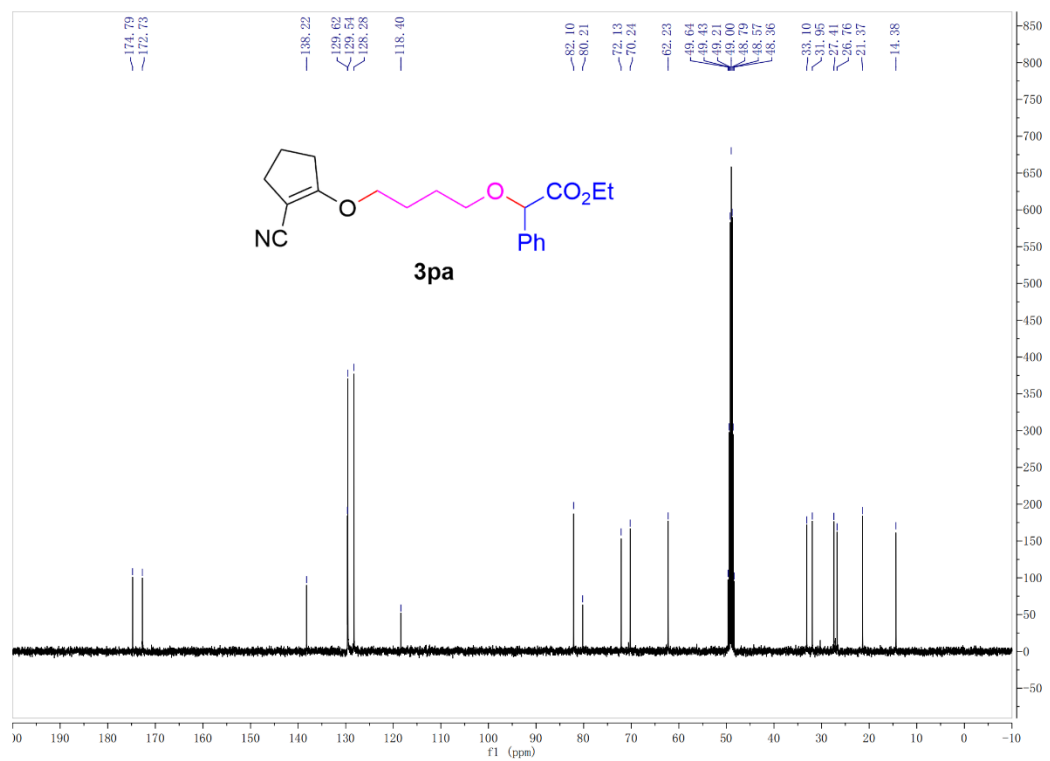

### <sup>1</sup>H NMR (400 MHz, CDCl<sub>3</sub>) Spectrum of 3ab

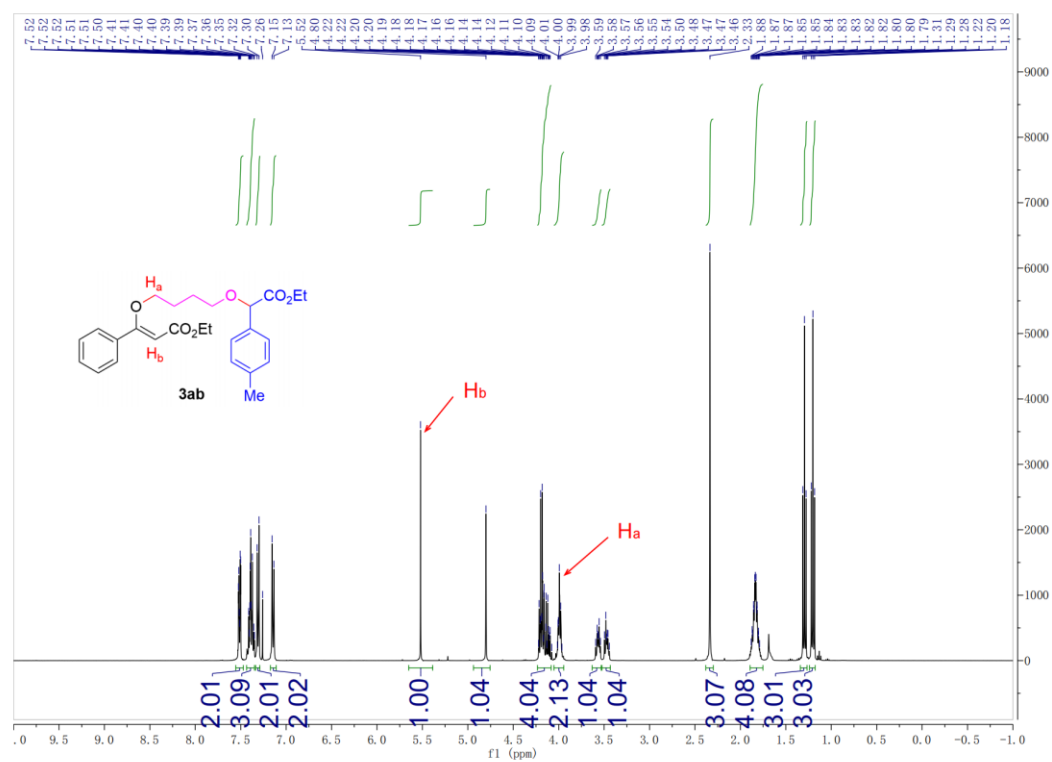

NOESY NMR (400 MHz, CDCl<sub>3</sub>) Spectrum of 3ab. Based on no NOE effect in  $H_a$  and  $H_b$ , the stereochemistry is Z.

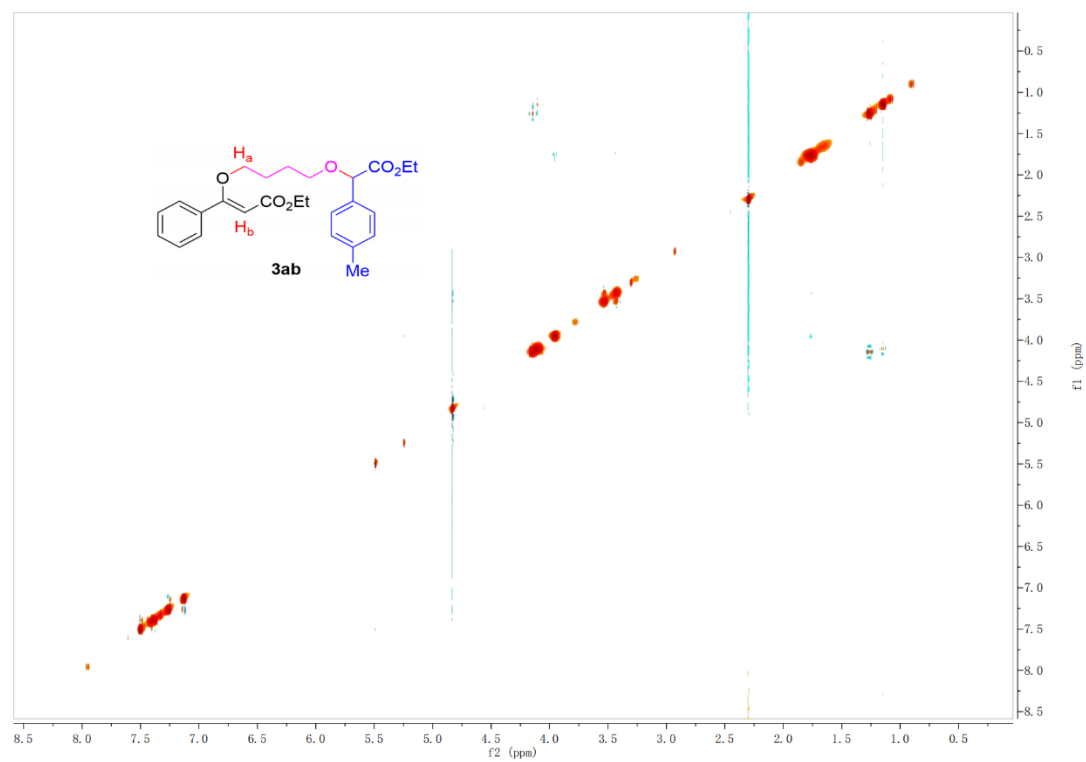

**$^{13}\text{C}\{^1\text{H}\}$  NMR (100 MHz,  $\text{CDCl}_3$ ) Spectrum of 3ab**

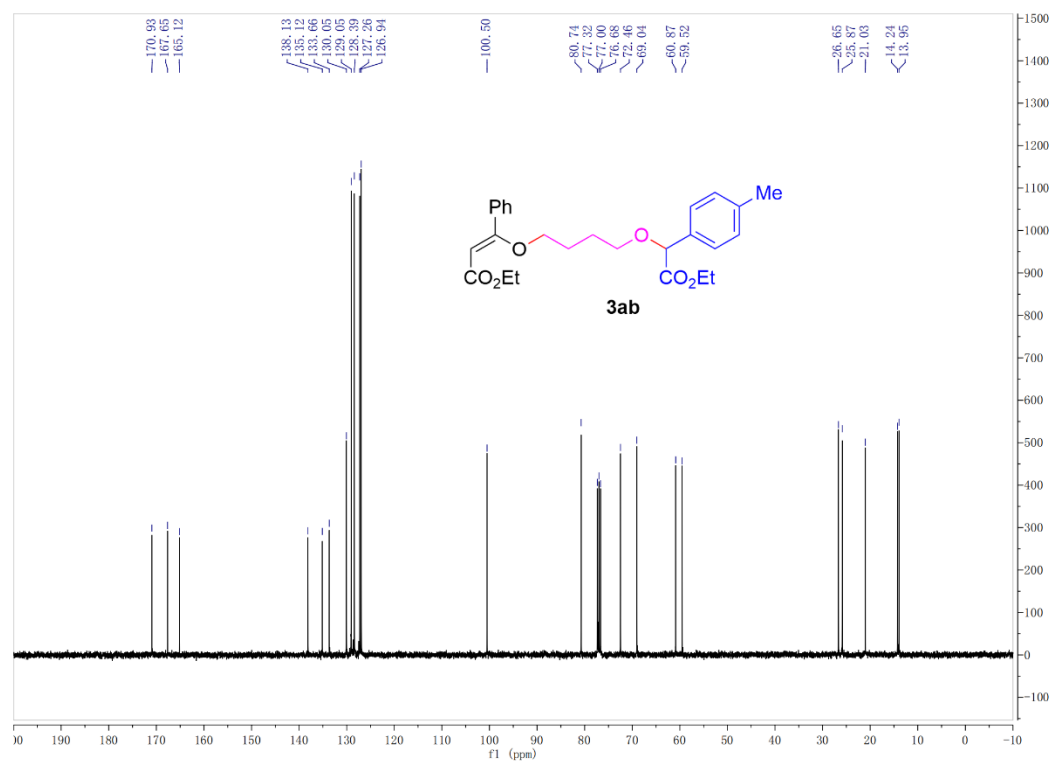

**$^1\text{H}$  NMR (400 MHz,  $d_6$ -DMSO) Spectrum of 3ac**

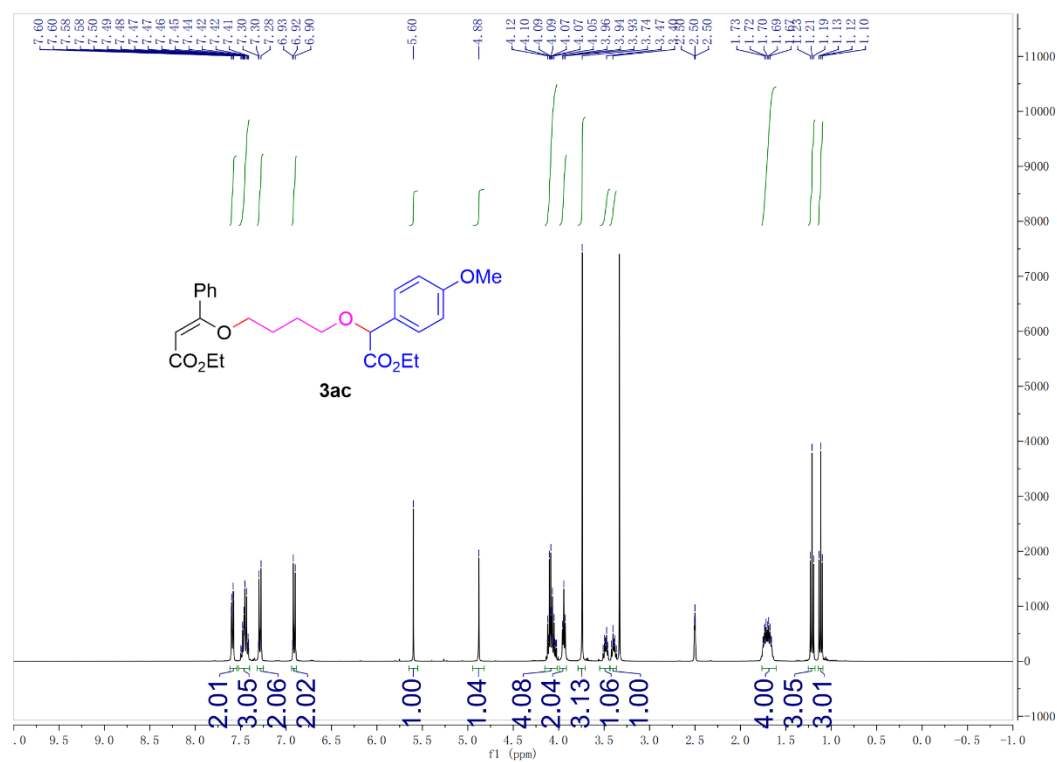

**$^{13}\text{C}\{^1\text{H}\}$  NMR (100 MHz,  $\text{CD}_3\text{OD}$ ) Spectrum of 3ac**

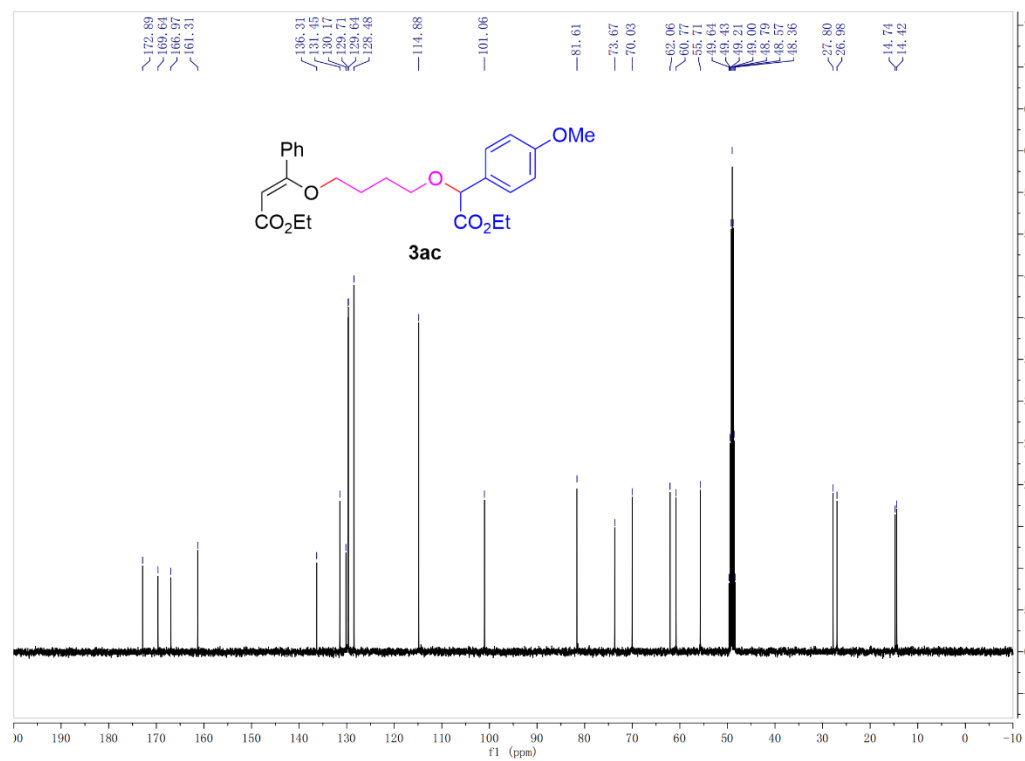

### $^1\text{H}$ NMR (400 MHz, $d_6$ -DMSO) Spectrum of 3ad

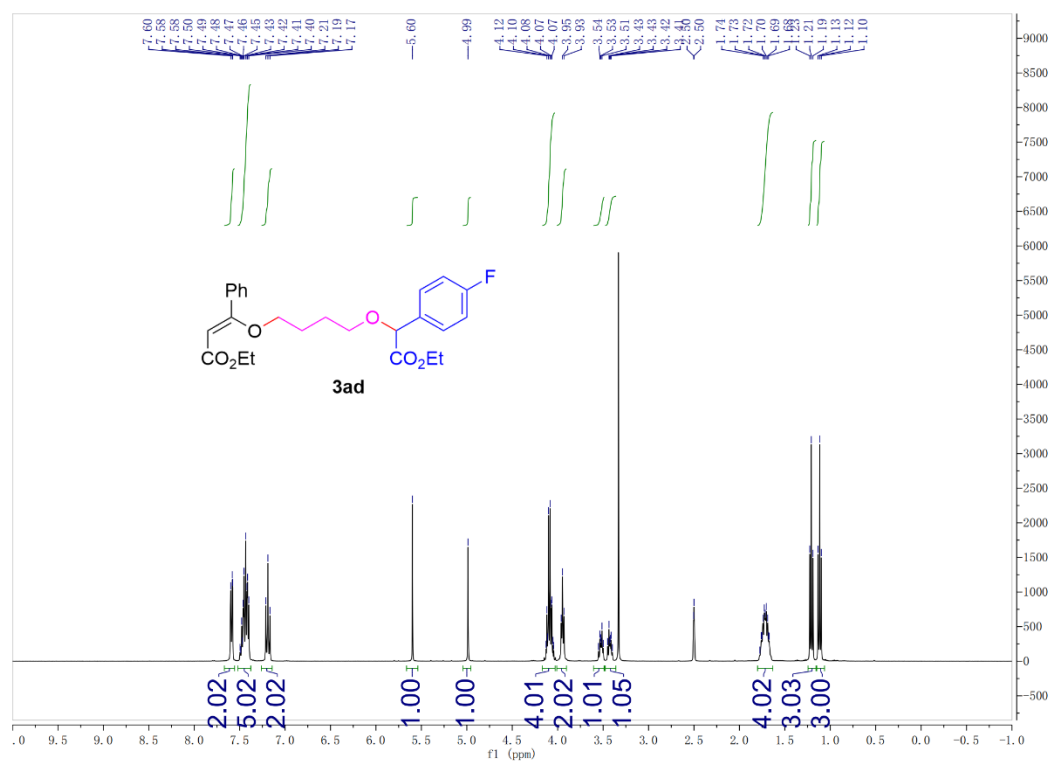

### $^{13}\text{C}\{^1\text{H}\}$ NMR (100 MHz, $d_6$ -DMSO) Spectrum of 3ad

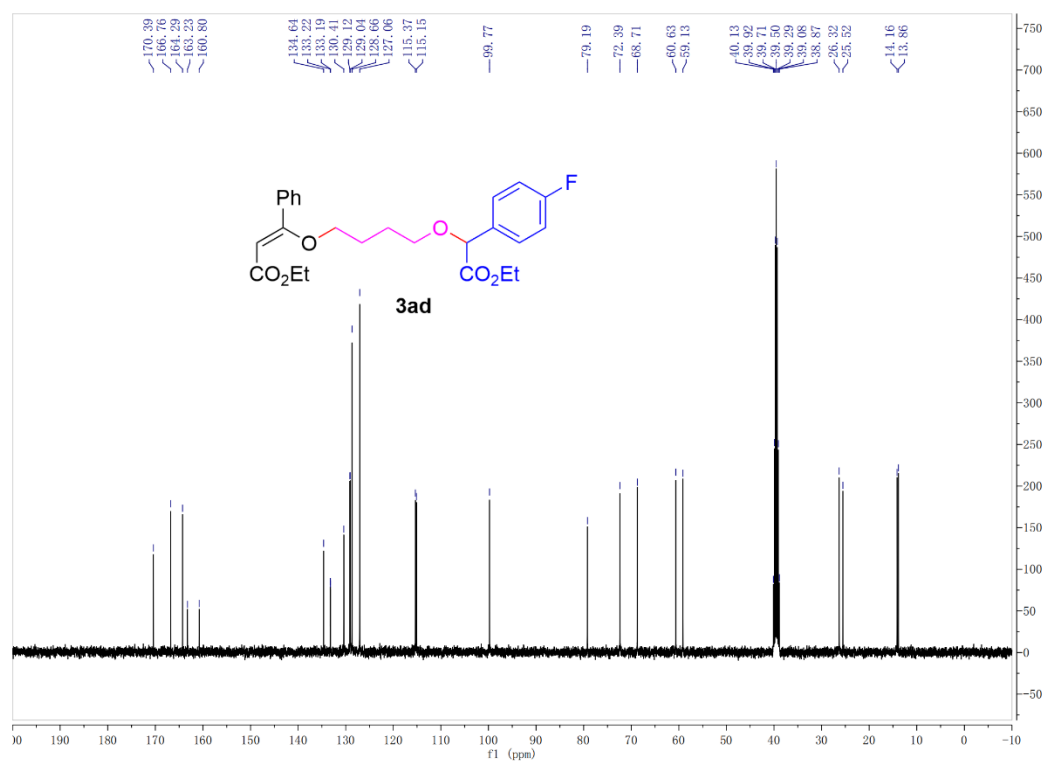



**<sup>19</sup>F NMR (376 MHz, d<sub>6</sub>-DMSO) Spectrum of 3ad**

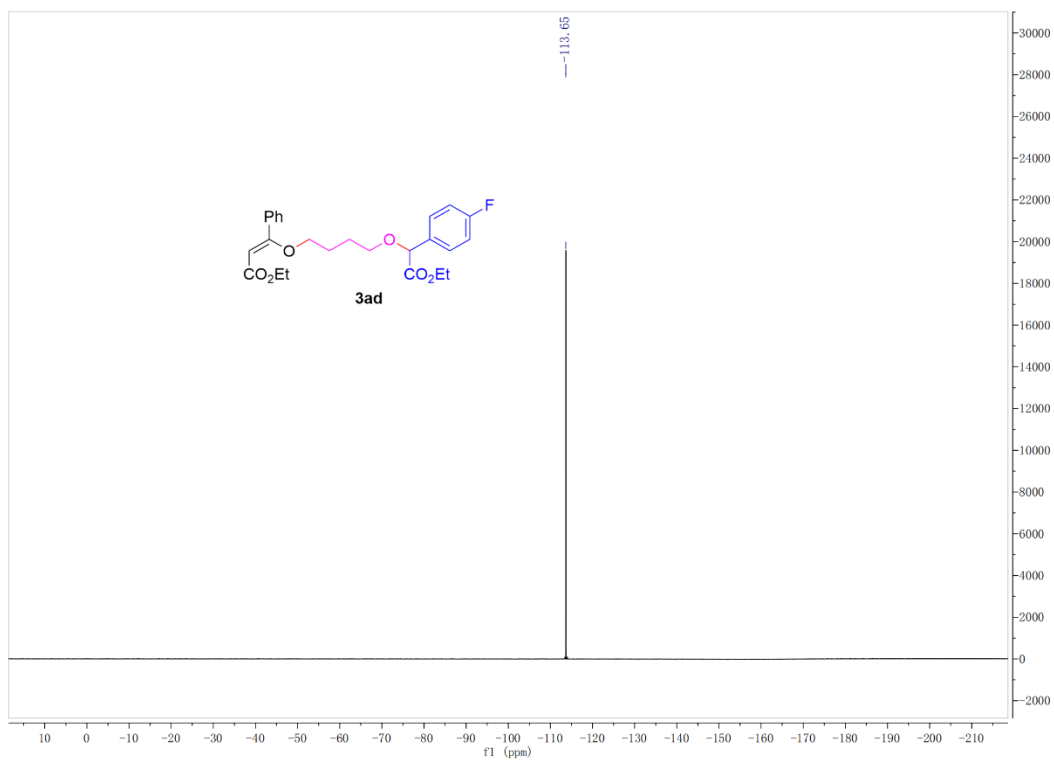

### $^1\text{H}$ NMR (400 MHz, $\text{CDCl}_3$ ) Spectrum of 3ae

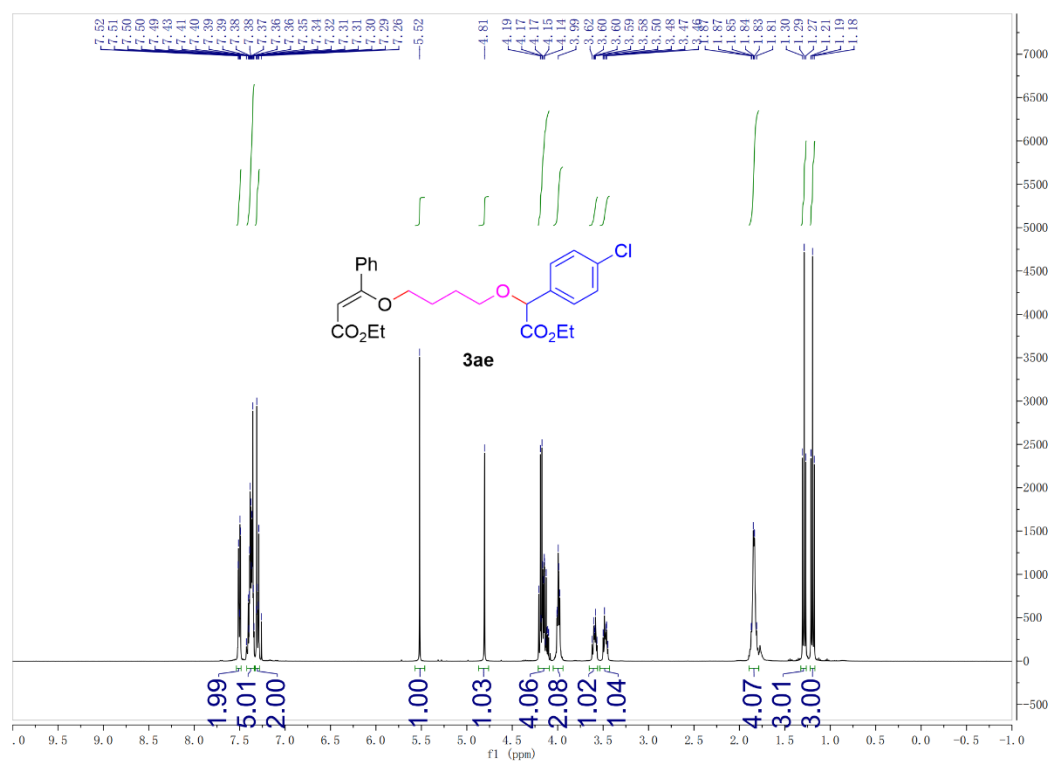

### $^{13}\text{C}\{^1\text{H}\}$ NMR (100 MHz, $d_6$ -DMSO) Spectrum of 3ae

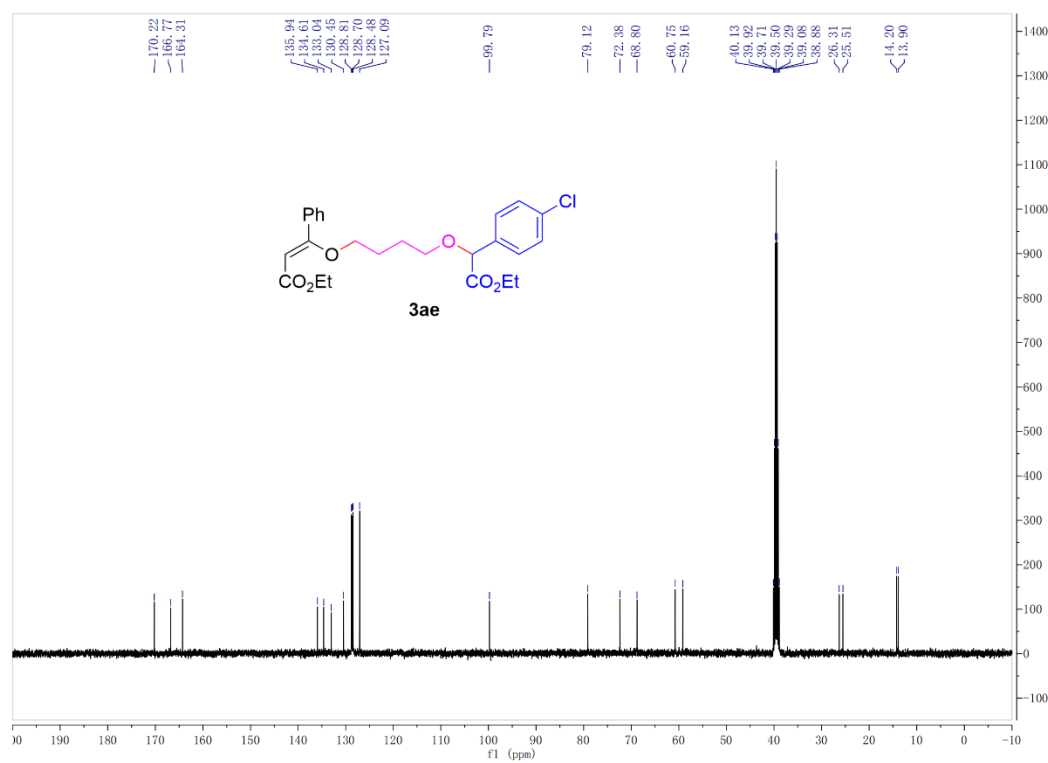

### $^1\text{H}$ NMR (400 MHz, $d_6$ -DMSO) Spectrum of 3af

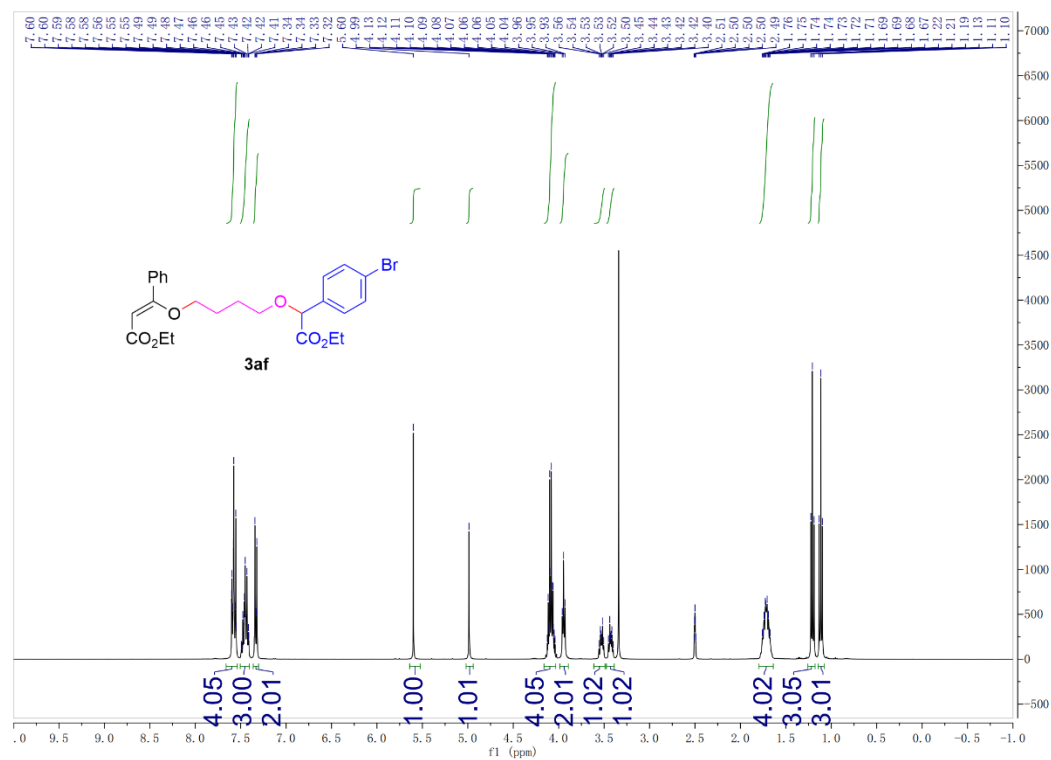

### $^{13}\text{C}\{^1\text{H}\}$ NMR (100 MHz, $d_6$ -DMSO) Spectrum of 3af

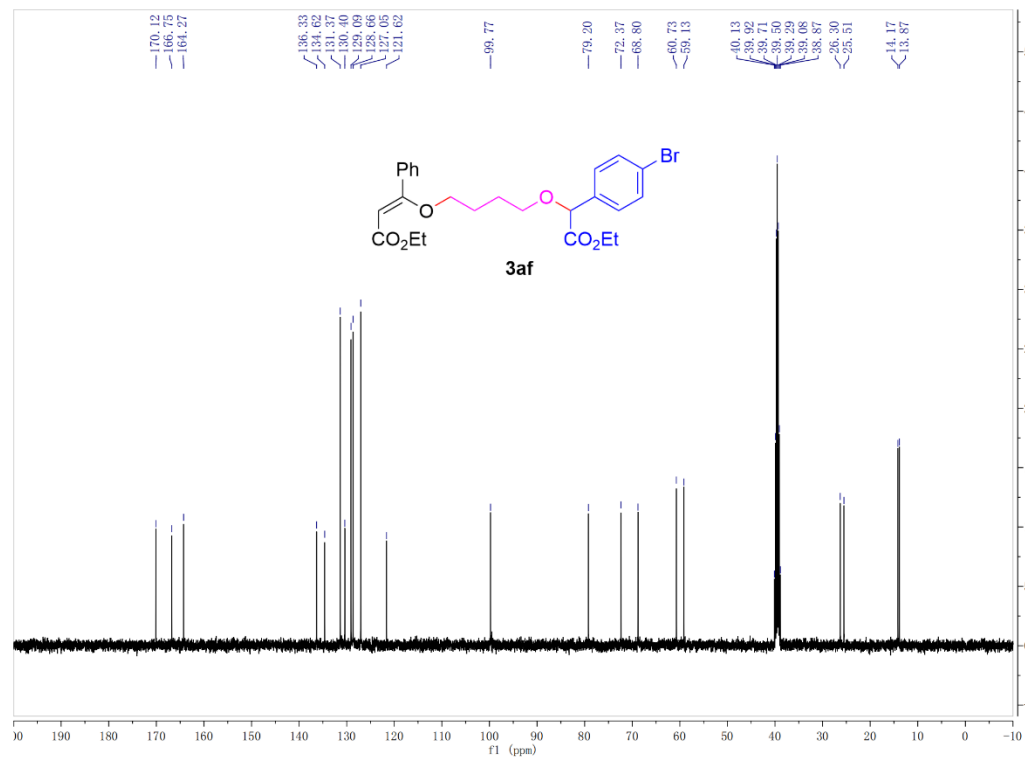

**<sup>1</sup>H NMR (400 MHz, CDCl<sub>3</sub>) Spectrum of 3ag**

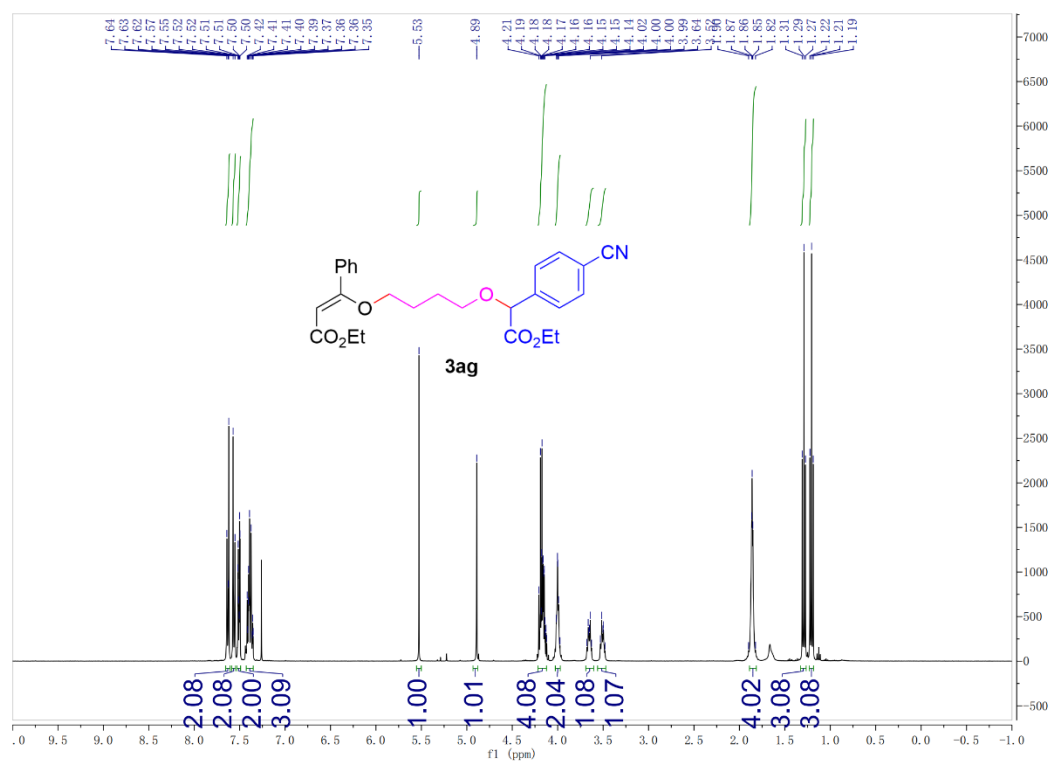

**<sup>13</sup>C{<sup>1</sup>H} NMR (100 MHz, d<sub>6</sub>-DMSO) Spectrum of 3ag**

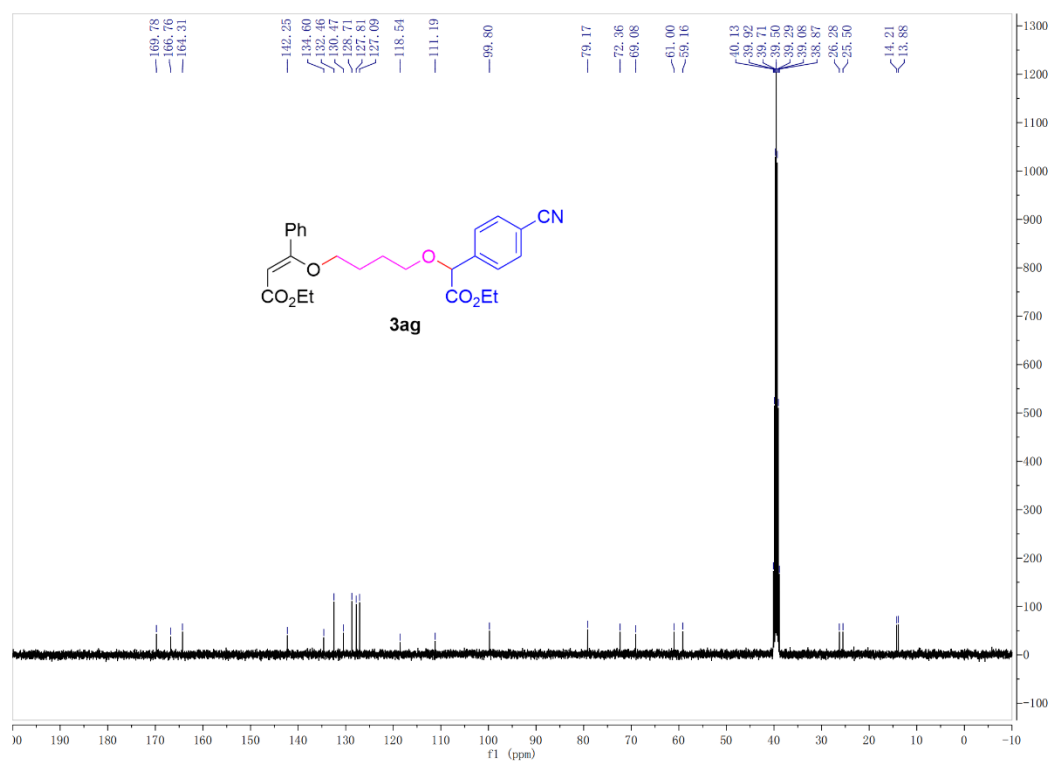

**<sup>1</sup>H NMR (400 MHz, CD<sub>3</sub>OD) Spectrum of 3ah**

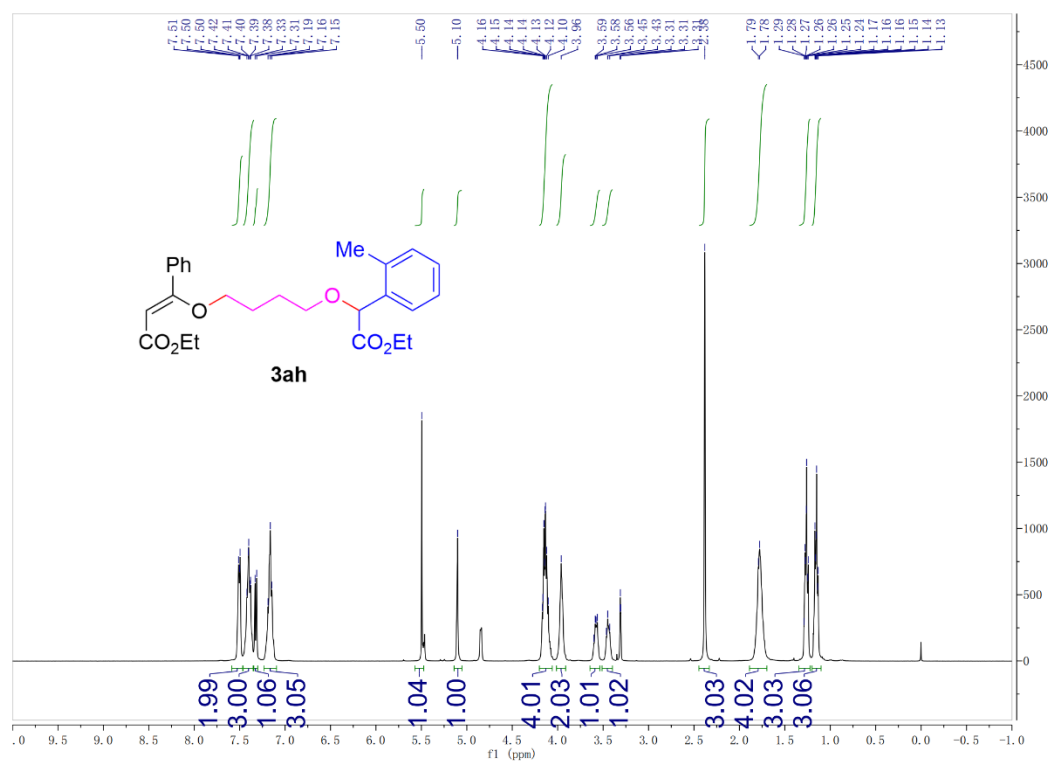

**<sup>13</sup>C{<sup>1</sup>H} NMR (100 MHz, CD<sub>3</sub>OD) Spectrum of 3ah**

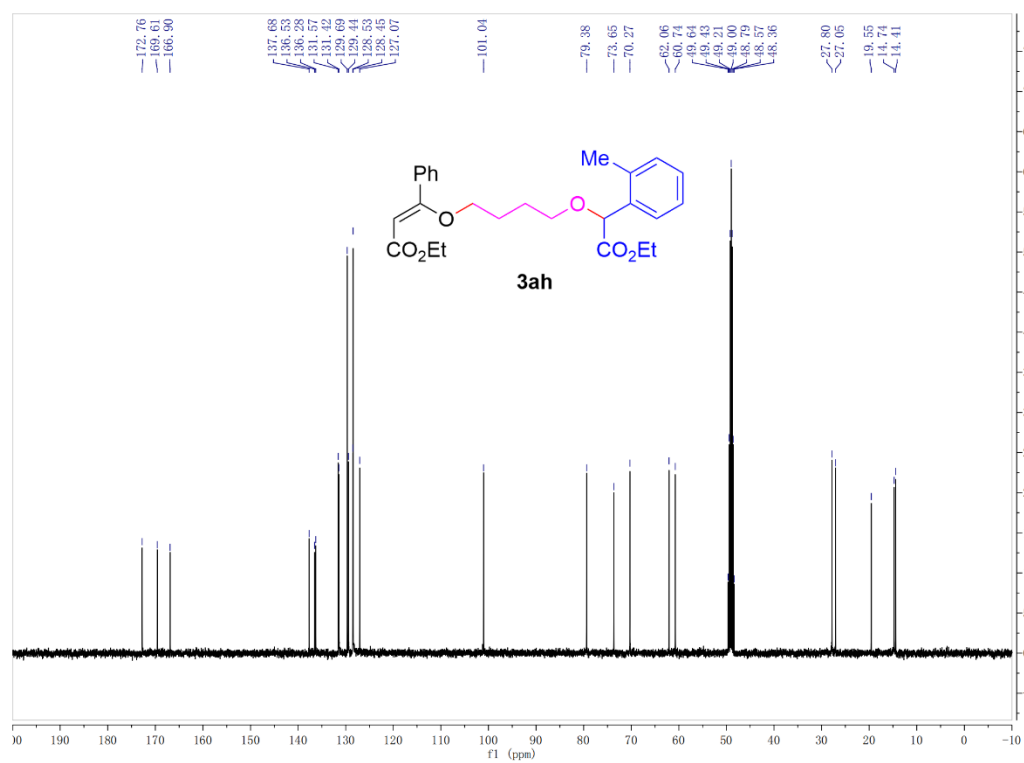

### <sup>1</sup>H NMR (400 MHz, CDCl<sub>3</sub>) Spectrum of 3ai

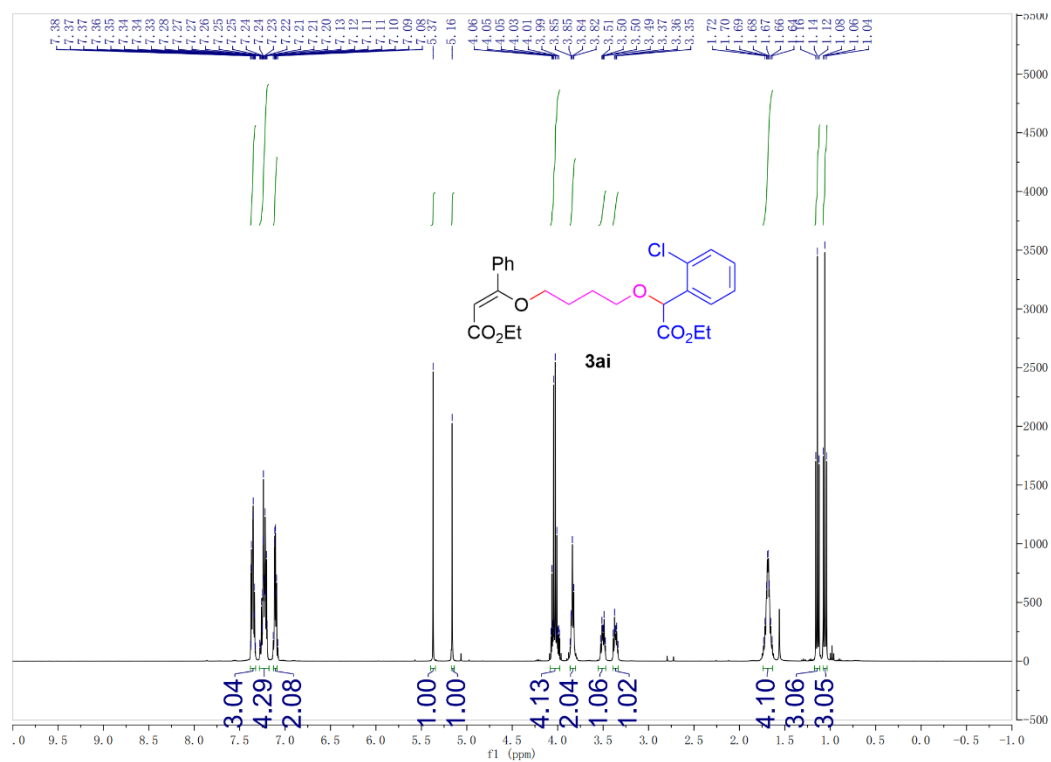

### <sup>13</sup>C{<sup>1</sup>H} NMR (100 MHz, CDCl<sub>3</sub>) Spectrum of 3ai

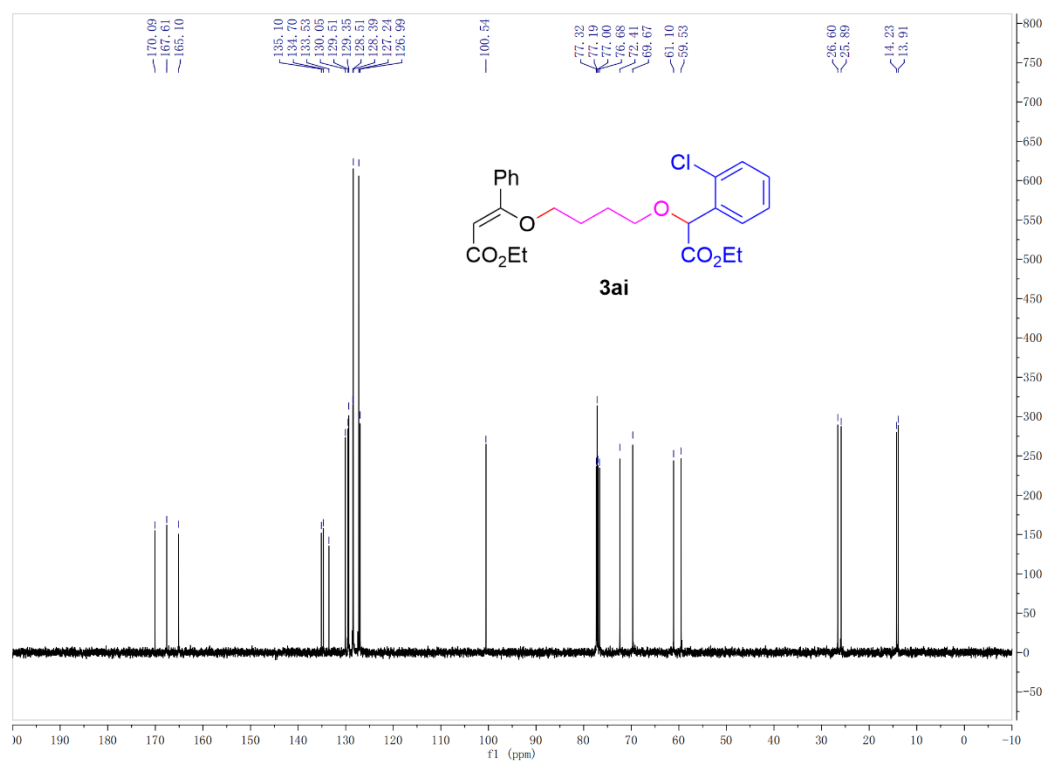

### $^1\text{H}$ NMR (400 MHz, $d_6$ -DMSO) Spectrum of 3aj

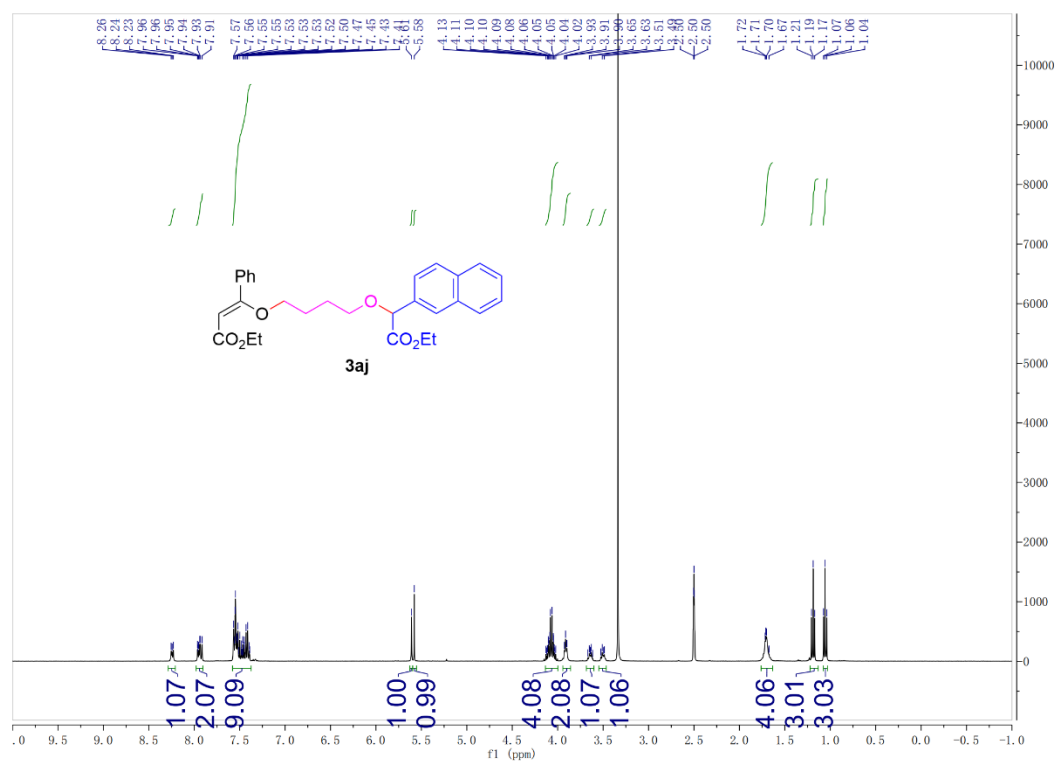

### $^{13}\text{C}\{^1\text{H}\}$ NMR (100 MHz, $\text{CD}_3\text{OD}$ ) Spectrum of 3aj

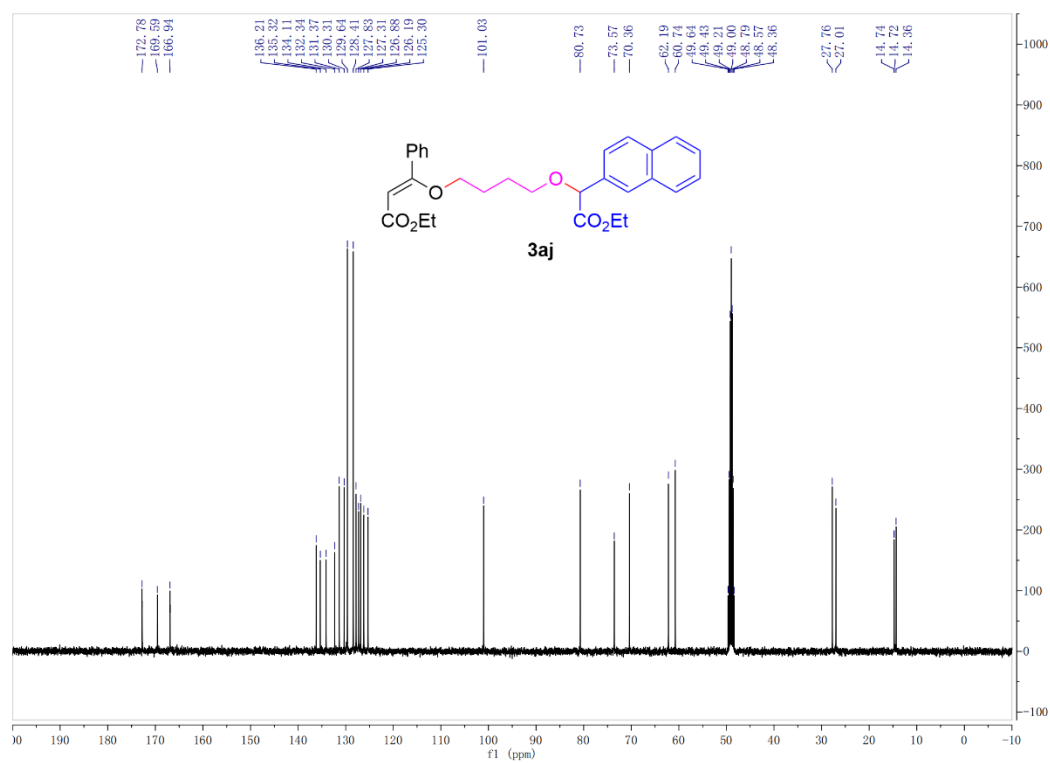

### <sup>1</sup>H NMR (400 MHz, CD<sub>3</sub>OD) Spectrum of 3ak

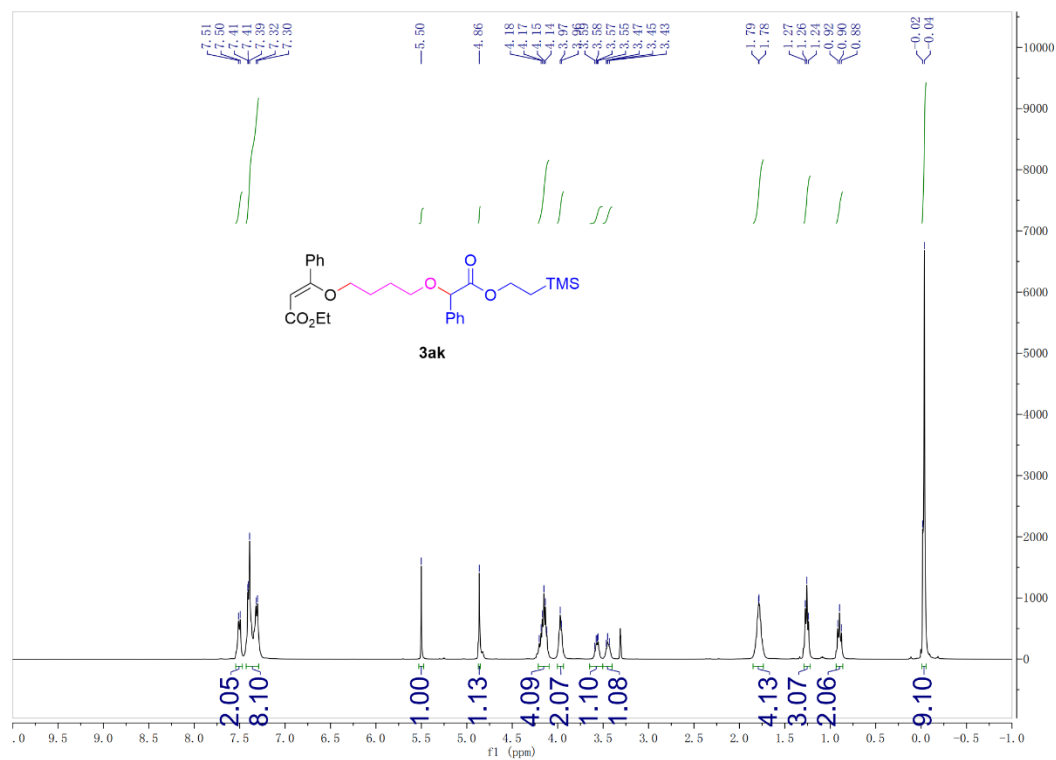

### <sup>13</sup>C{<sup>1</sup>H} NMR (100 MHz, CD<sub>3</sub>OD) Spectrum of 3ak

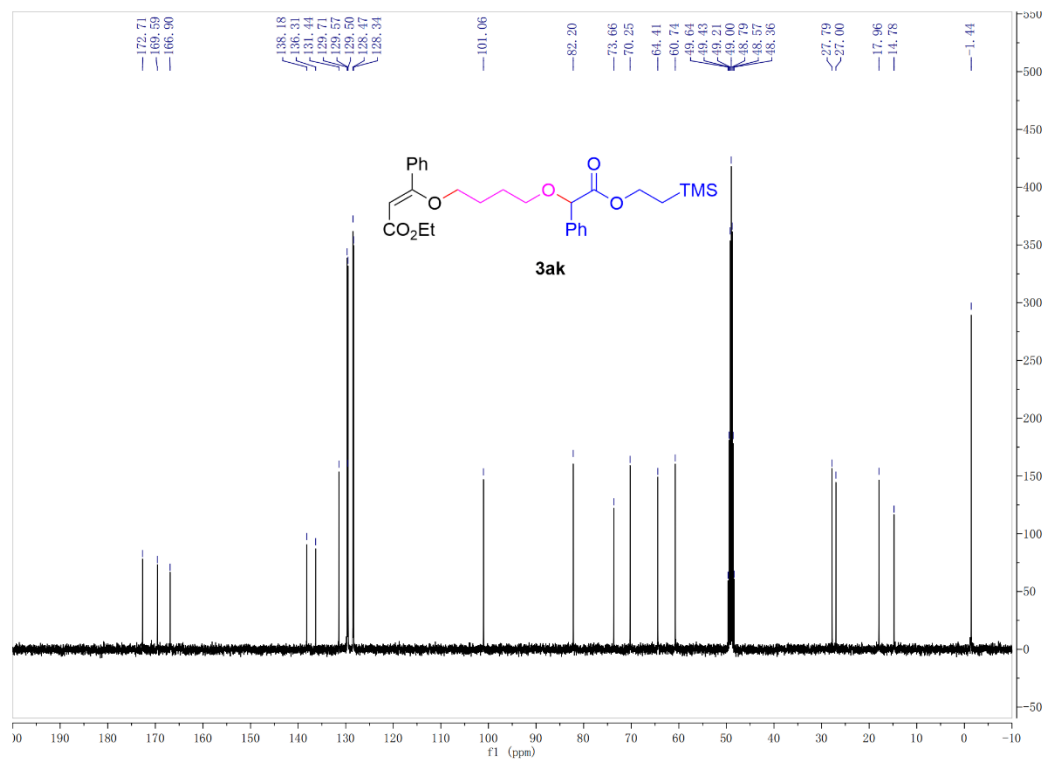



### $^1\text{H}$ NMR (400 MHz, $d_6$ -DMSO) Spectrum of 3al

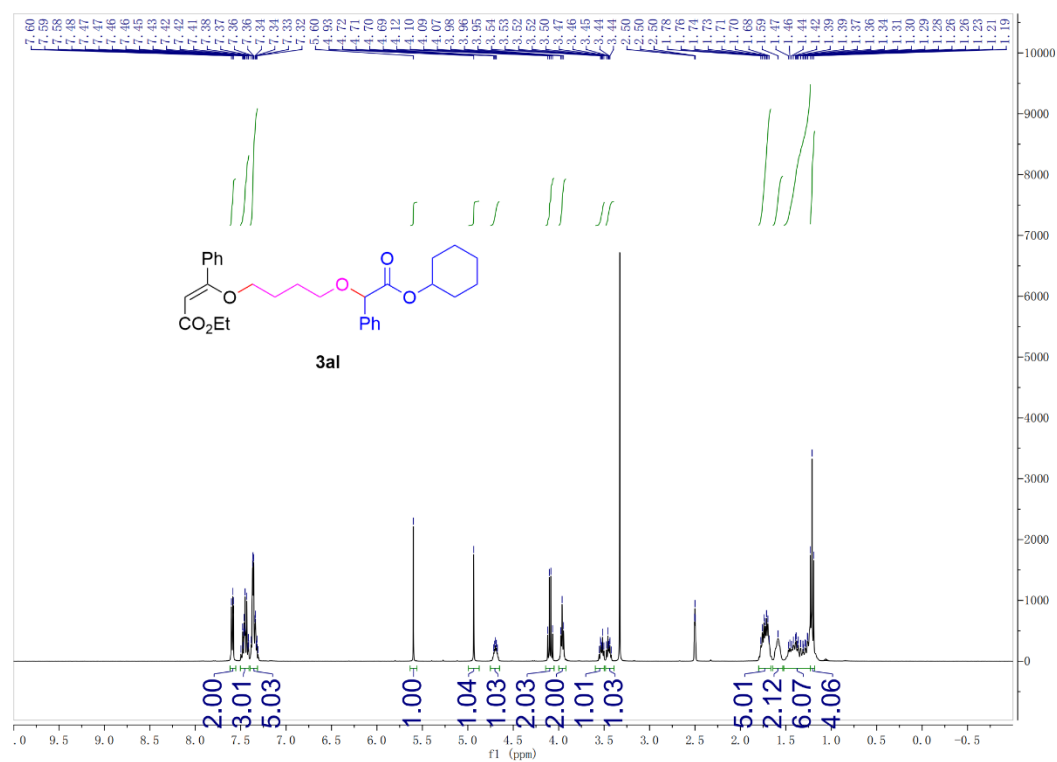

### $^{13}\text{C}\{^1\text{H}\}$ NMR (100 MHz, $d_6$ -DMSO) Spectrum of 3al

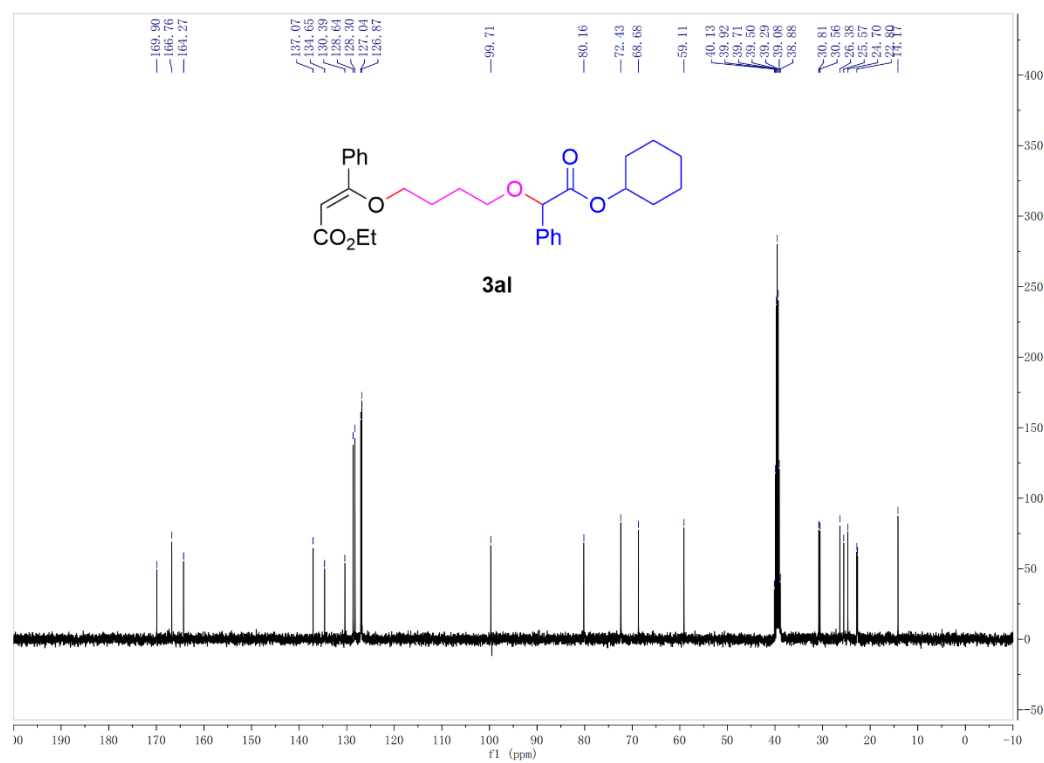

### $^1\text{H}$ NMR (400 MHz, $\text{CD}_3\text{OD}$ ) Spectrum of 3am

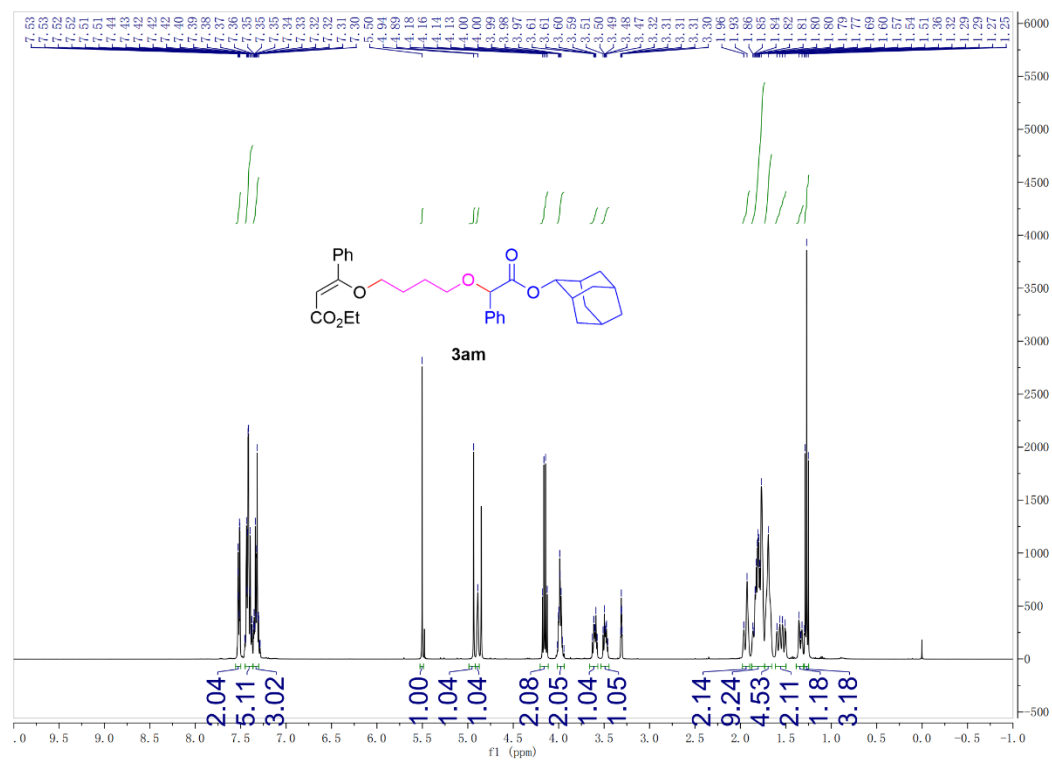

### $^{13}\text{C}\{^1\text{H}\}$ NMR (100 MHz, $d_6$ -DMSO) Spectrum of 3am

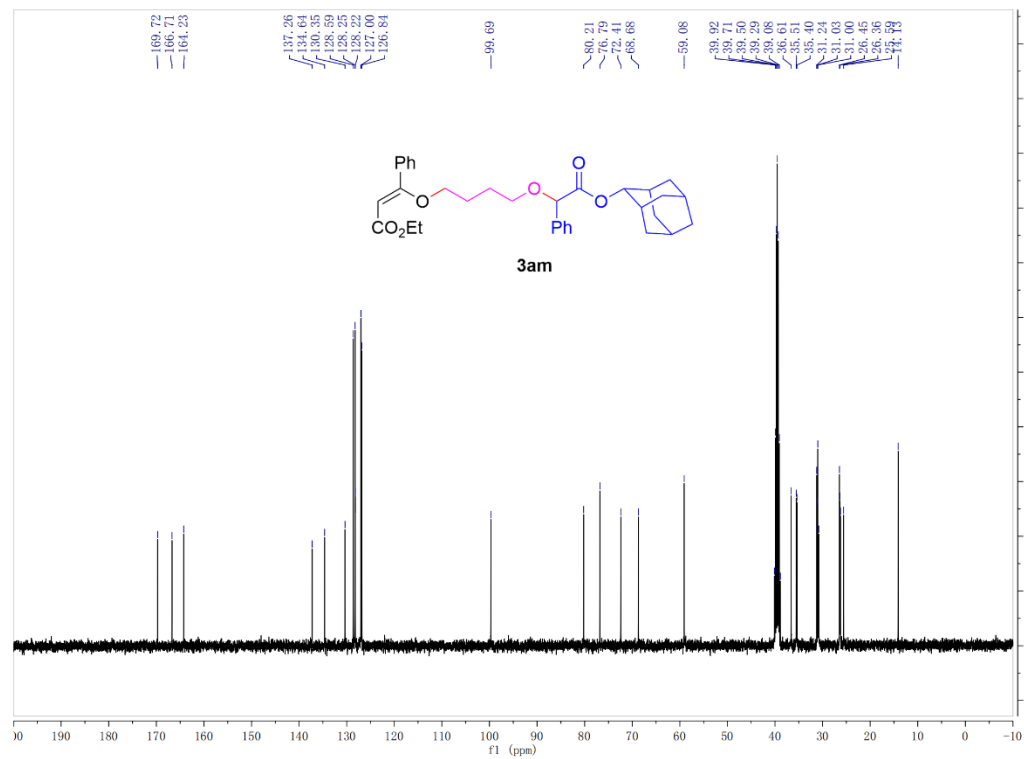

### <sup>1</sup>H NMR (400 MHz, d<sub>6</sub>-DMSO) Spectrum of 3an

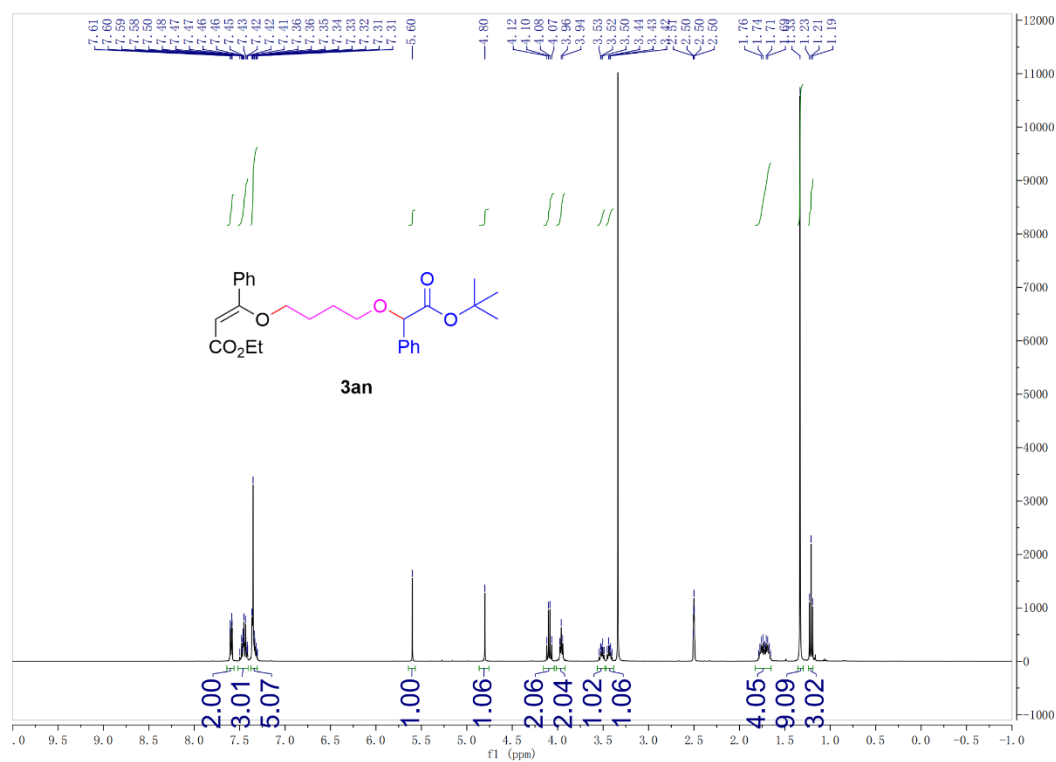

### <sup>13</sup>C{<sup>1</sup>H} NMR (100 MHz, d<sub>6</sub>-DMSO) Spectrum of 3an

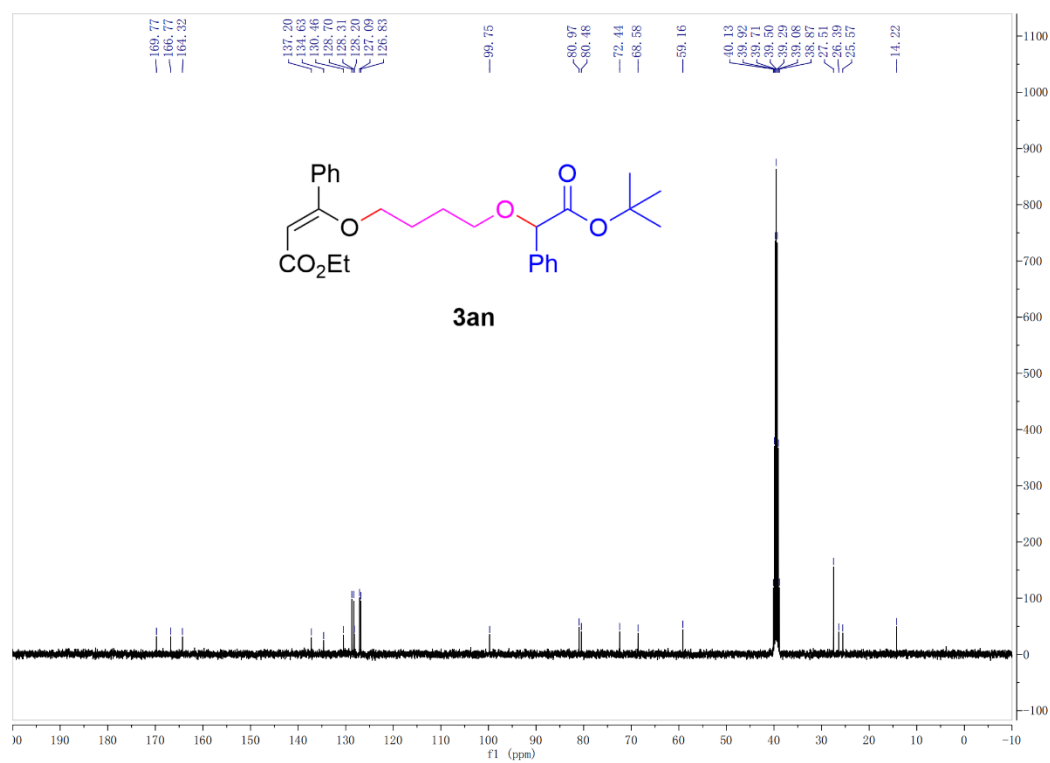

### $^1\text{H}$ NMR (400 MHz, $d_6$ -DMSO) Spectrum of 3ao

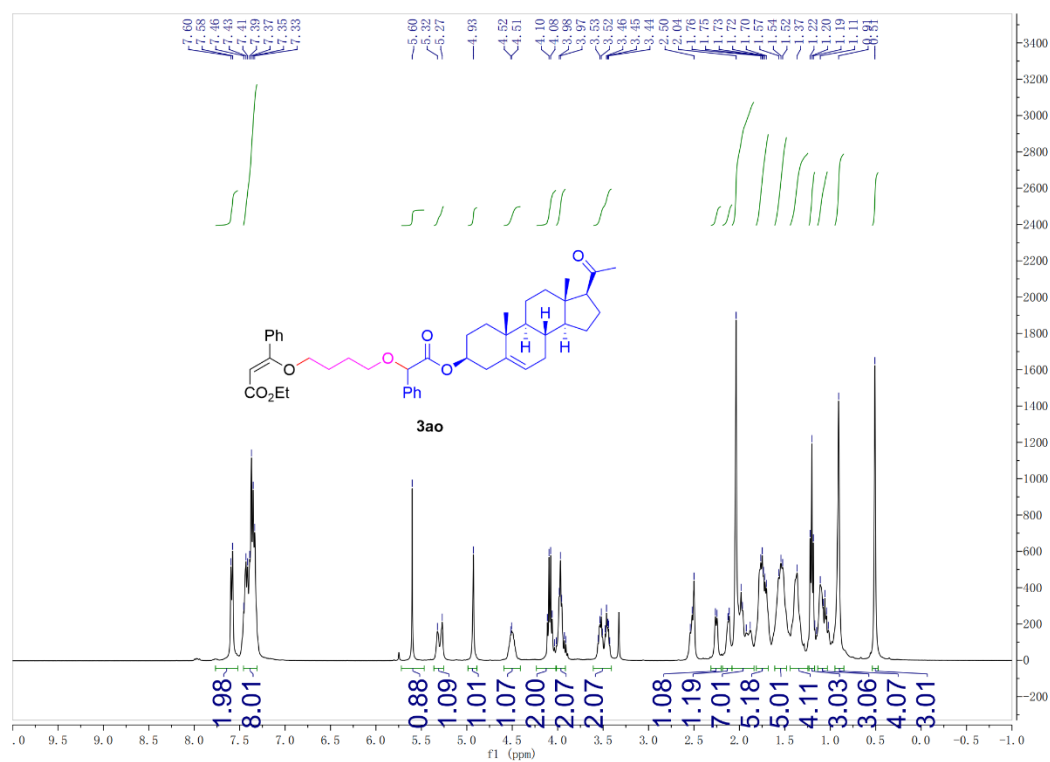

### $^{13}\text{C}\{^1\text{H}\}$ NMR (100 MHz, $d_6$ -DMSO) Spectrum of 3ao

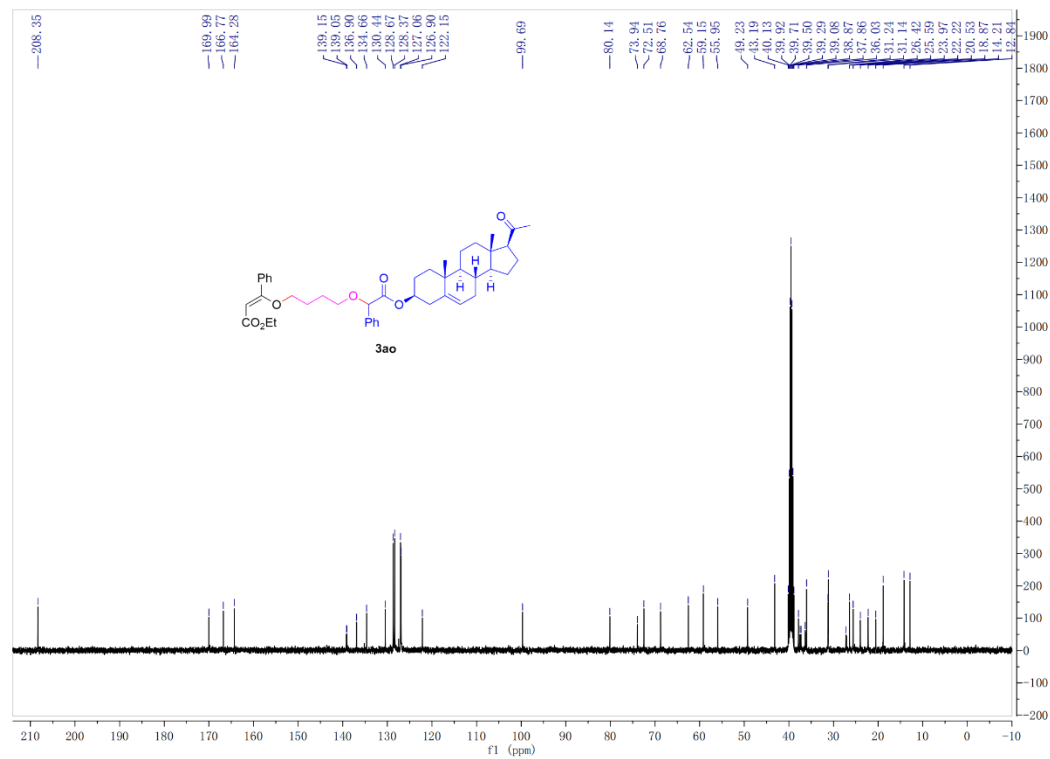

### <sup>1</sup>H NMR (300 MHz, CDCl<sub>3</sub>) Spectrum of 3ap

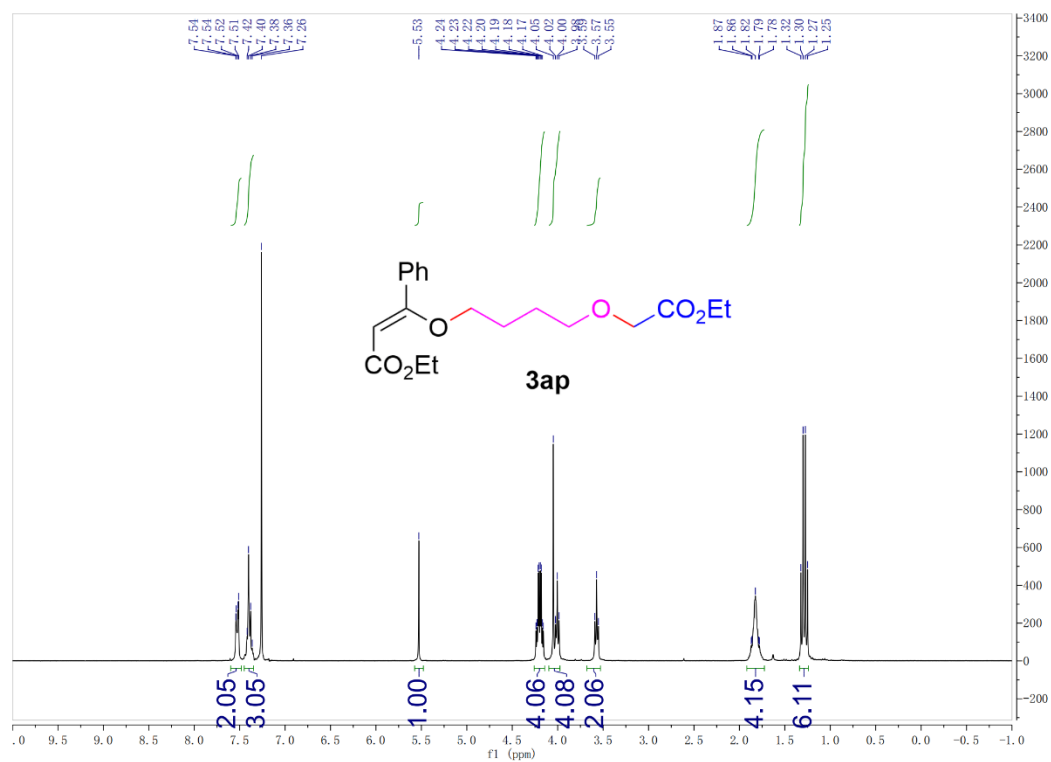

### <sup>13</sup>C{<sup>1</sup>H} NMR (75 MHz, CDCl<sub>3</sub>) Spectrum of 3ap

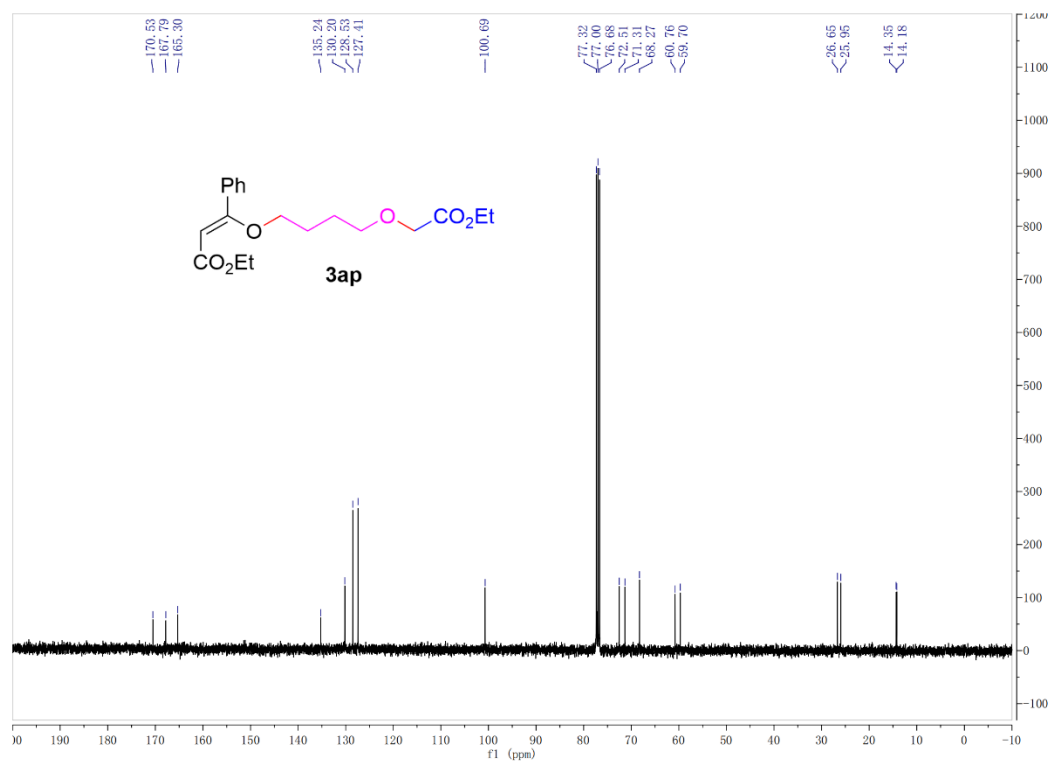

### $^1\text{H}$ NMR (400 MHz, $\text{CD}_3\text{OD}$ ) Spectrum of 4a

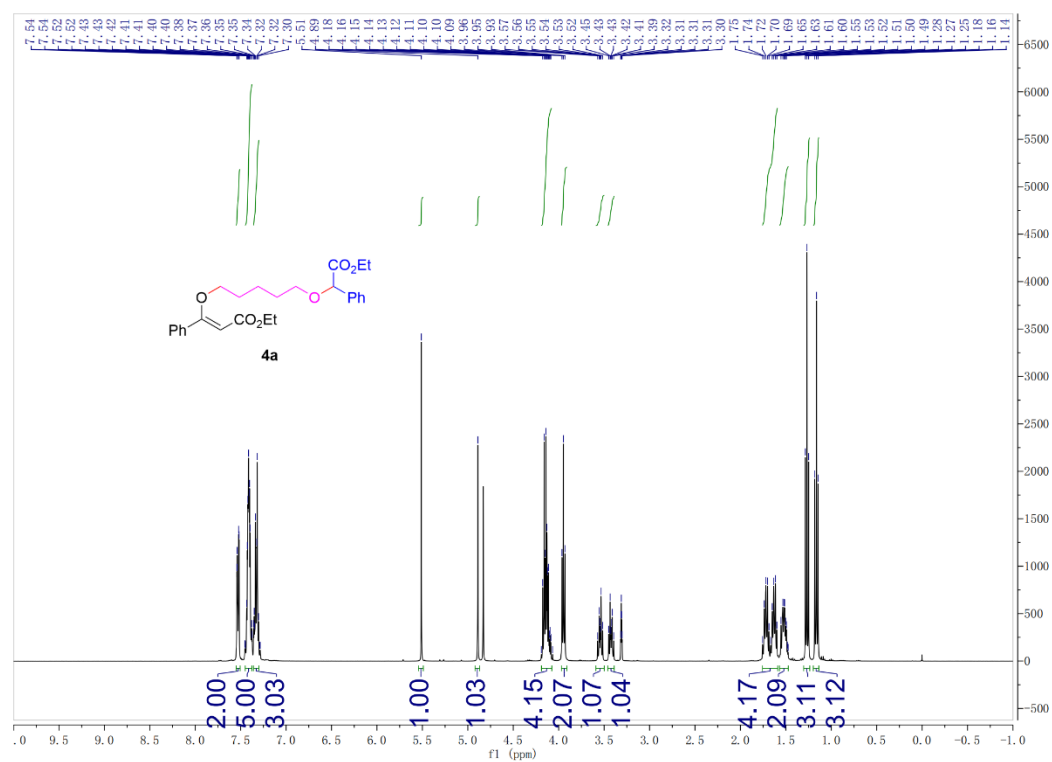

### $^{13}\text{C}\{^1\text{H}\}$ NMR (100 MHz, $\text{CD}_3\text{OD}$ ) Spectrum of 4a

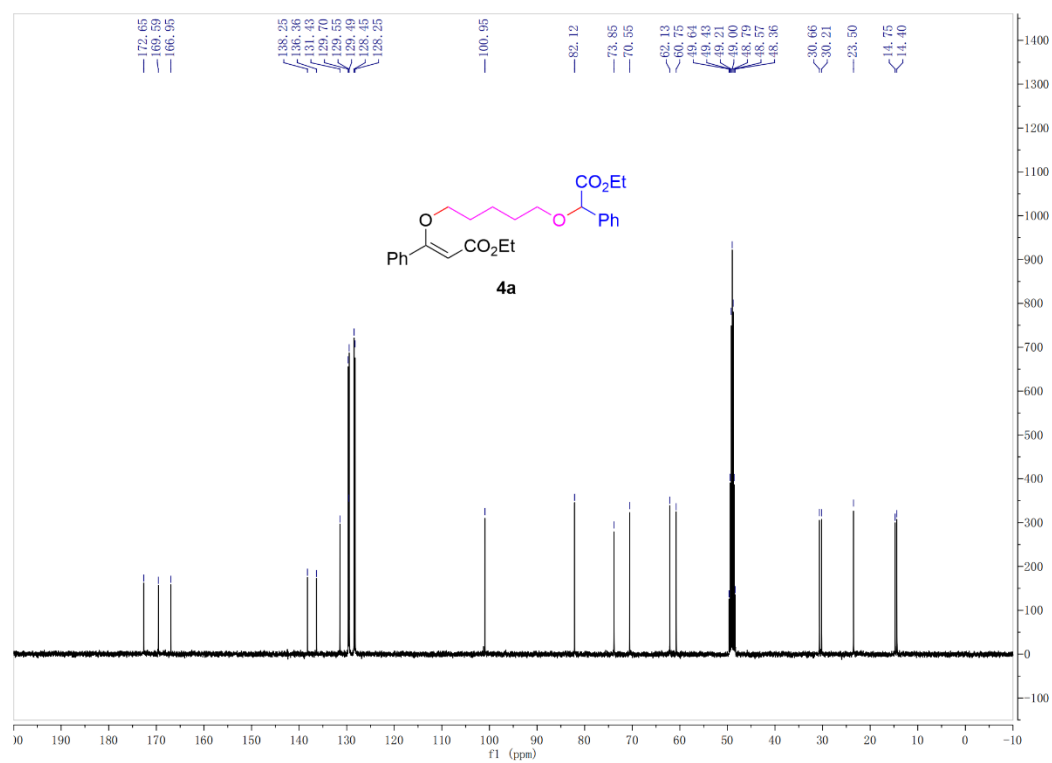

**<sup>1</sup>H NMR (400 MHz, CD<sub>3</sub>OD) Spectrum of 4b**

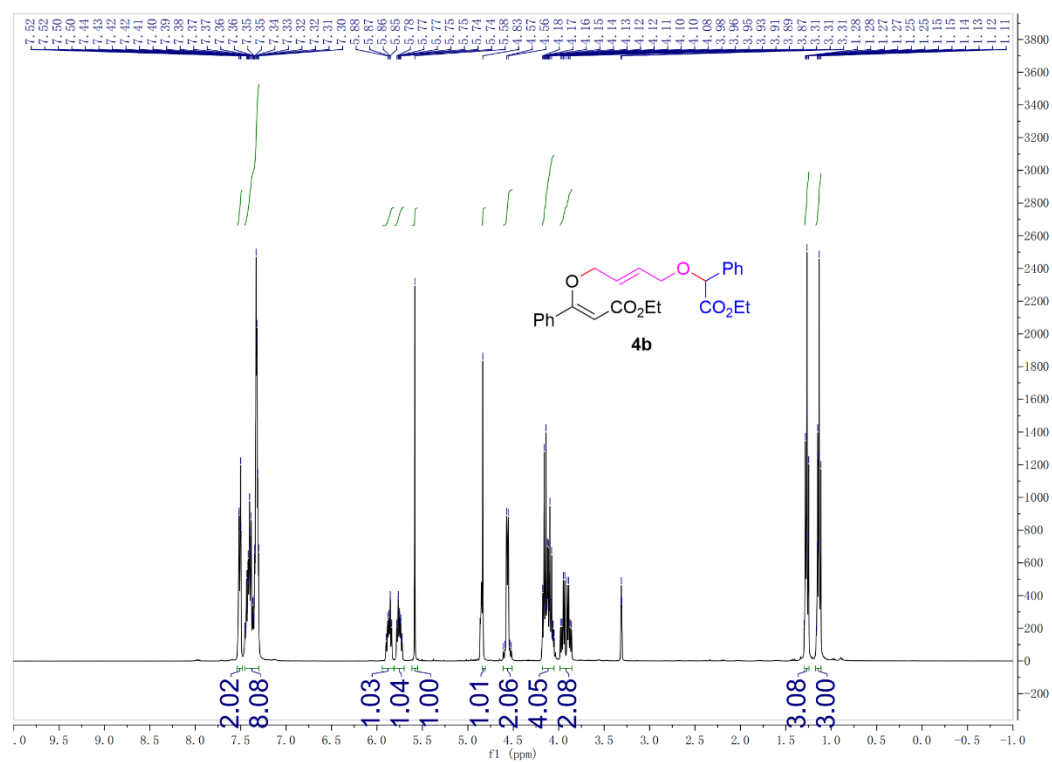

**<sup>13</sup>C{<sup>1</sup>H} NMR (100 MHz, CD<sub>3</sub>OD) Spectrum of 4b**

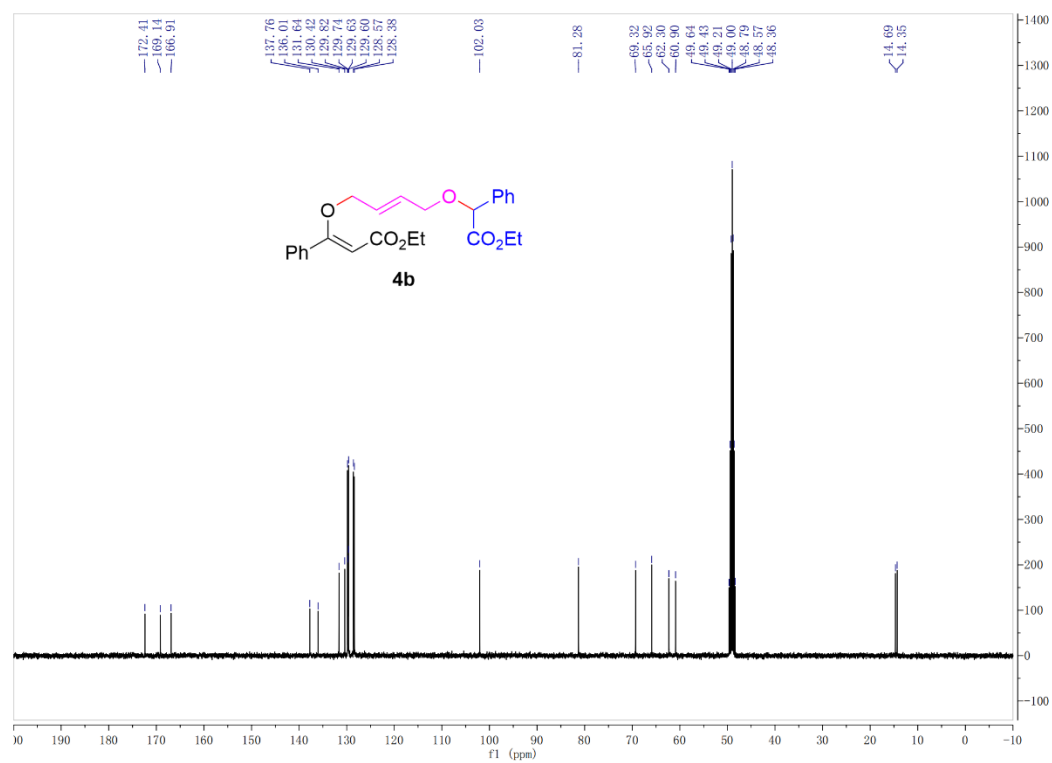

**<sup>1</sup>H NMR (400 MHz, d<sub>6</sub>-DMSO) Spectrum of 4c**

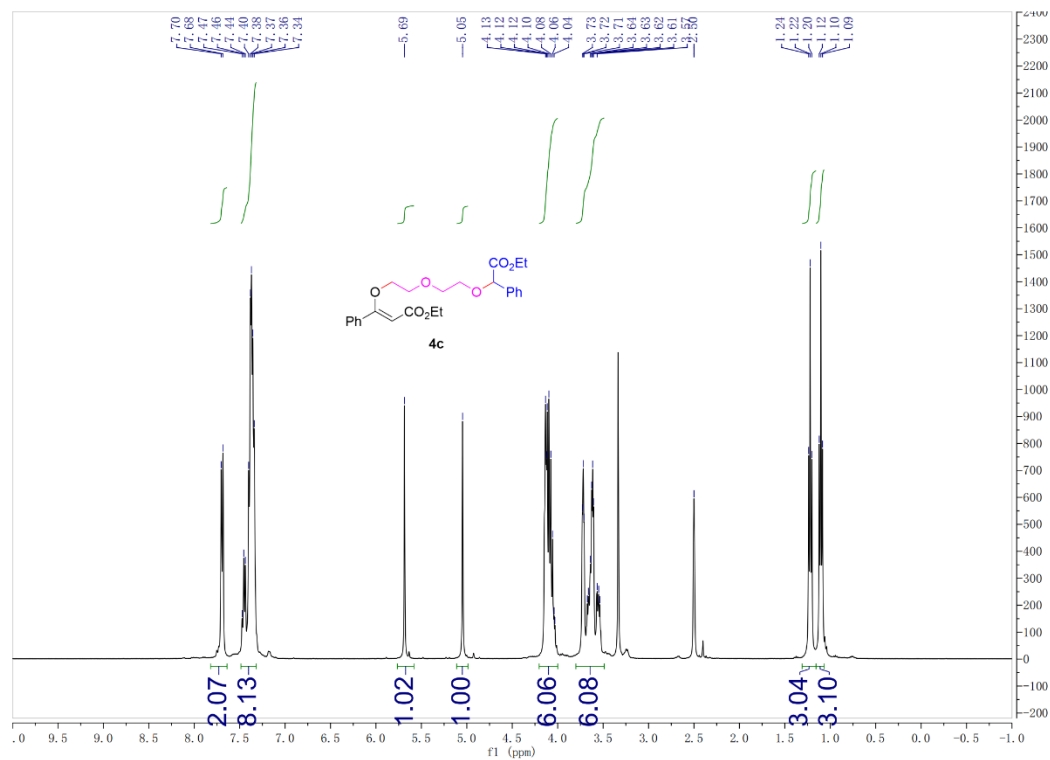

**<sup>13</sup>C{<sup>1</sup>H} NMR (100 MHz, d<sub>6</sub>-DMSO) Spectrum of 4c**

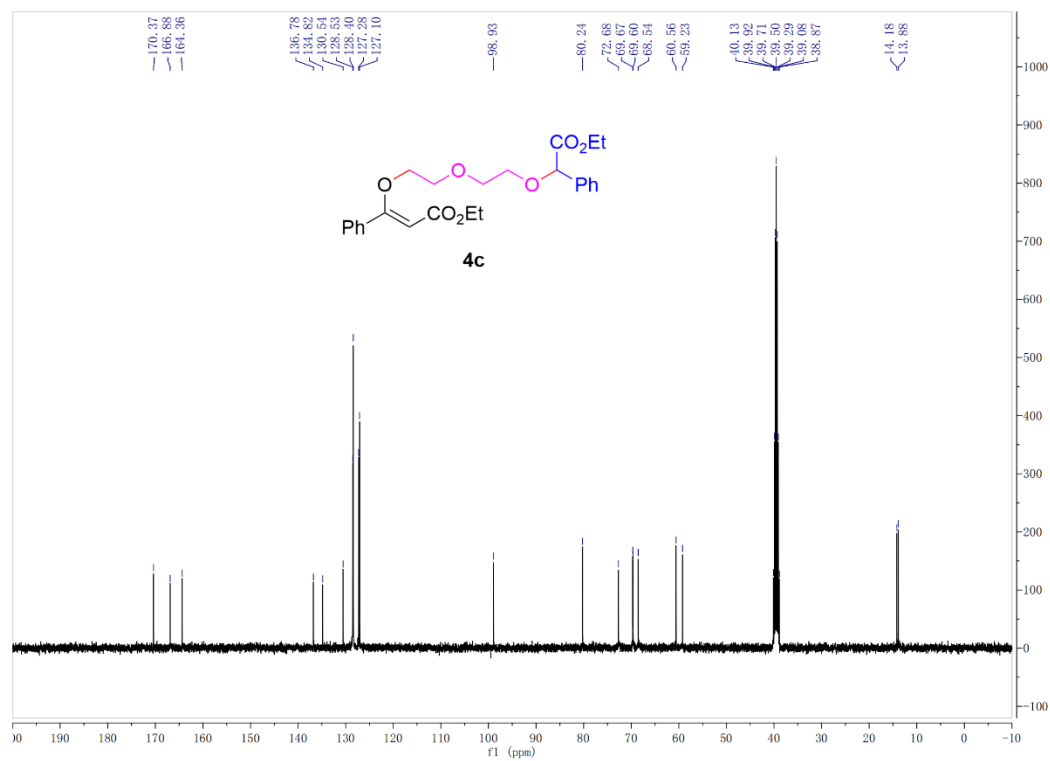

Supplement: d3cc03317a1.pdf [file d3cc03317a1.pdf]
